# Supplementary material for: Inequalities in Open Source Software Development: Analysis of Contributor’s Commits in Apache Software Foundation Projects
Source: PLoS One. 2016 Apr 20;11(4):e0152976. doi: 10.1371/journal.pone.0152976 (PMC4838325; doi:10.1371/journal.pone.0152976)
Supplement: S1 File — Apache Software Foundation Open Source projects source data. (XLSX) [file pone.0152976.s001.xlsx]

## Sheet: FULL DATA
name	total_code_lines	total_commit_count	main_language	contributor_name	commits	homepage	Commiter count
Apache Accumulo	279704	5563	Java	Andrew George Wells	1	http://accumulo.apache.org/	51
Apache Accumulo	279704	5563	Java	Arshak Navruzyan	1	http://accumulo.apache.org/	51
Apache Accumulo	279704	5563	Java	dallaybatta	1	http://accumulo.apache.org/	51
Apache Accumulo	279704	5563	Java	haydenmarchant	1	http://accumulo.apache.org/	51
Apache Accumulo	279704	5563	Java	Jared Winick	1	http://accumulo.apache.org/	51
Apache Accumulo	279704	5563	Java	Jeff Field	1	http://accumulo.apache.org/	51
Apache Accumulo	279704	5563	Java	Jessica Seastrom	1	http://accumulo.apache.org/	51
Apache Accumulo	279704	5563	Java	Jonathan Hsieh	1	http://accumulo.apache.org/	51
Apache Accumulo	279704	5563	Java	Jonathan Park	1	http://accumulo.apache.org/	51
Apache Accumulo	279704	5563	Java	meislerj	1	http://accumulo.apache.org/	51
Apache Accumulo	279704	5563	Java	Morgan Haskel	1	http://accumulo.apache.org/	51
Apache Accumulo	279704	5563	Java	Russ Weeks	1	http://accumulo.apache.org/	51
Apache Accumulo	279704	5563	Java	Vincent Russell	1	http://accumulo.apache.org/	51
Apache Accumulo	279704	5563	Java	Ed Coleman	2	http://accumulo.apache.org/	51
Apache Accumulo	279704	5563	Java	Gary Singh	2	http://accumulo.apache.org/	51
Apache Accumulo	279704	5563	Java	Hung Pham	2	http://accumulo.apache.org/	51
Apache Accumulo	279704	5563	Java	Jason Trost	2	http://accumulo.apache.org/	51
Apache Accumulo	279704	5563	Java	Michael Fagan	2	http://accumulo.apache.org/	51
Apache Accumulo	279704	5563	Java	ofishel	2	http://accumulo.apache.org/	51
Apache Accumulo	279704	5563	Java	Ryan Leary	2	http://accumulo.apache.org/	51
Apache Accumulo	279704	5563	Java	tmalaska	2	http://accumulo.apache.org/	51
Apache Accumulo	279704	5563	Java	Tony Stevenson	2	http://accumulo.apache.org/	51
Apache Accumulo	279704	5563	Java	David Protzman	3	http://accumulo.apache.org/	51
Apache Accumulo	279704	5563	Java	David S. Wang	3	http://accumulo.apache.org/	51
Apache Accumulo	279704	5563	Java	Drew Farris	3	http://accumulo.apache.org/	51
Apache Accumulo	279704	5563	Java	Jeffrey S. Schwartz	3	http://accumulo.apache.org/	51
Apache Accumulo	279704	5563	Java	Michael Wall	3	http://accumulo.apache.org/	51
Apache Accumulo	279704	5563	Java	John Stoneham	4	http://accumulo.apache.org/	51
Apache Accumulo	279704	5563	Java	jpmcnamee	4	http://accumulo.apache.org/	51
Apache Accumulo	279704	5563	Java	Andrew L. Farris	5	http://accumulo.apache.org/	51
Apache Accumulo	279704	5563	Java	Jonathan M Hsieh	5	http://accumulo.apache.org/	51
Apache Accumulo	279704	5563	Java	Alex Moundalexis	6	http://accumulo.apache.org/	51
Apache Accumulo	279704	5563	Java	Michael Allen	7	http://accumulo.apache.org/	51
Apache Accumulo	279704	5563	Java	Michael Berman	8	http://accumulo.apache.org/	51
Apache Accumulo	279704	5563	Java	Dave Marion	12	http://accumulo.apache.org/	51
Apache Accumulo	279704	5563	Java	Benson Margulies	13	http://accumulo.apache.org/	51
Apache Accumulo	279704	5563	Java	Vikram Srivastava	16	http://accumulo.apache.org/	51
Apache Accumulo	279704	5563	Java	Bill Slacum	23	http://accumulo.apache.org/	51
Apache Accumulo	279704	5563	Java	Sean Hickey	42	http://accumulo.apache.org/	51
Apache Accumulo	279704	5563	Java	Corey J. Nolet	52	http://accumulo.apache.org/	51
Apache Accumulo	279704	5563	Java	David Medinets	55	http://accumulo.apache.org/	51
Apache Accumulo	279704	5563	Java	Sean Busbey	96	http://accumulo.apache.org/	51
Apache Accumulo	279704	5563	Java	Mike Drob	169	http://accumulo.apache.org/	51
Apache Accumulo	279704	5563	Java	Bill Havanki	171	http://accumulo.apache.org/	51
Apache Accumulo	279704	5563	Java	Billie Rinaldi	322	http://accumulo.apache.org/	51
Apache Accumulo	279704	5563	Java	Christopher Tubbs	473	http://accumulo.apache.org/	51
Apache Accumulo	279704	5563	Java	Eric Newton	544	http://accumulo.apache.org/	51
Apache Accumulo	279704	5563	Java	John Vines	602	http://accumulo.apache.org/	51
Apache Accumulo	279704	5563	Java	Keith Turner	666	http://accumulo.apache.org/	51
Apache Accumulo	279704	5563	Java	Josh Elser	675	http://accumulo.apache.org/	51
Apache Accumulo	279704	5563	Java	Eric C. Newton	1068	http://accumulo.apache.org/	51
Apache ACE	84982	1464	Java	btopping	1	http://ace.apache.org/	13
Apache ACE	84982	1464	Java	danielsh	1	http://ace.apache.org/	13
Apache ACE	84982	1464	Java	joes	1	http://ace.apache.org/	13
Apache ACE	84982	1464	Java	cziegeler	2	http://ace.apache.org/	13
Apache ACE	84982	1464	Java	bdelacretaz	3	http://ace.apache.org/	13
Apache ACE	84982	1464	Java	paulb	7	http://ace.apache.org/	13
Apache ACE	84982	1464	Java	jbonofre	45	http://ace.apache.org/	13
Apache ACE	84982	1464	Java	angelos	66	http://ace.apache.org/	13
Apache ACE	84982	1464	Java	tonit	82	http://ace.apache.org/	13
Apache ACE	84982	1464	Java	bramk	121	http://ace.apache.org/	13
Apache ACE	84982	1464	Java	pauls	218	http://ace.apache.org/	13
Apache ACE	84982	1464	Java	jawi	274	http://ace.apache.org/	13
Apache ACE	84982	1464	Java	marrs	643	http://ace.apache.org/	13
Apache ActiveMQ	1582357	13938	Java	dain	1	http://activemq.apache.org/	58
Apache ActiveMQ	1582357	13938	Java	Dain Sundstrom	1	http://activemq.apache.org/	58
Apache ActiveMQ	1582357	13938	Java	foconer	1	http://activemq.apache.org/	58
Apache ActiveMQ	1582357	13938	Java	Henri Yandell	1	http://activemq.apache.org/	58
Apache ActiveMQ	1582357	13938	Java	James Carman	1	http://activemq.apache.org/	58
Apache ActiveMQ	1582357	13938	Java	Jason Sherman	1	http://activemq.apache.org/	58
Apache ActiveMQ	1582357	13938	Java	Jean-Baptiste Onofre	1	http://activemq.apache.org/	58
Apache ActiveMQ	1582357	13938	Java	Krzysztof Sobkowiak	1	http://activemq.apache.org/	58
Apache ActiveMQ	1582357	13938	Java	Les Hazlewood	1	http://activemq.apache.org/	58
Apache ActiveMQ	1582357	13938	Java	adc	2	http://activemq.apache.org/	58
Apache ActiveMQ	1582357	13938	Java	Alex Dean	2	http://activemq.apache.org/	58
Apache ActiveMQ	1582357	13938	Java	alexd	2	http://activemq.apache.org/	58
Apache ActiveMQ	1582357	13938	Java	brianm	2	http://activemq.apache.org/	58
Apache ActiveMQ	1582357	13938	Java	Colin W Macnaughton	4	http://activemq.apache.org/	58
Apache ActiveMQ	1582357	13938	Java	David Blevins	5	http://activemq.apache.org/	58
Apache ActiveMQ	1582357	13938	Java	bayard	7	http://activemq.apache.org/	58
Apache ActiveMQ	1582357	13938	Java	Brian McCallister	7	http://activemq.apache.org/	58
Apache ActiveMQ	1582357	13938	Java	Dennis Cook	7	http://activemq.apache.org/	58
Apache ActiveMQ	1582357	13938	Java	Daniel Kulp	8	http://activemq.apache.org/	58
Apache ActiveMQ	1582357	13938	Java	Joseph Dennis O. Gapuz	8	http://activemq.apache.org/	58
Apache ActiveMQ	1582357	13938	Java	Patrick Edward Lapus Villacorta	8	http://activemq.apache.org/	58
Apache ActiveMQ	1582357	13938	Java	Darwin G. Flores	9	http://activemq.apache.org/	58
Apache ActiveMQ	1582357	13938	Java	ningjiang	9	http://activemq.apache.org/	58
Apache ActiveMQ	1582357	13938	Java	Willem Ning Jiang	9	http://activemq.apache.org/	58
Apache ActiveMQ	1582357	13938	Java	artnaseef	10	http://activemq.apache.org/	58
Apache ActiveMQ	1582357	13938	Java	Alan Cabrera	11	http://activemq.apache.org/	58
Apache ActiveMQ	1582357	13938	Java	bsnyder	13	http://activemq.apache.org/	58
Apache ActiveMQ	1582357	13938	Java	Bruce Snyder	14	http://activemq.apache.org/	58
Apache ActiveMQ	1582357	13938	Java	Dhiraj Bokde	15	http://activemq.apache.org/	58
Apache ActiveMQ	1582357	13938	Java	jlim	17	http://activemq.apache.org/	58
Apache ActiveMQ	1582357	13938	Java	Nathan Christopher Mittler	20	http://activemq.apache.org/	58
Apache ActiveMQ	1582357	13938	Java	aco	23	http://activemq.apache.org/	58
Apache ActiveMQ	1582357	13938	Java	tmielke	26	http://activemq.apache.org/	58
Apache ActiveMQ	1582357	13938	Java	Gregory John Wilkins	31	http://activemq.apache.org/	58
Apache ActiveMQ	1582357	13938	Java	janstey	31	http://activemq.apache.org/	58
Apache ActiveMQ	1582357	13938	Java	ceposta	40	http://activemq.apache.org/	58
Apache ActiveMQ	1582357	13938	Java	David Jencks	40	http://activemq.apache.org/	58
Apache ActiveMQ	1582357	13938	Java	Christian Posta	43	http://activemq.apache.org/	58
Apache ActiveMQ	1582357	13938	Java	djencks	43	http://activemq.apache.org/	58
Apache ActiveMQ	1582357	13938	Java	Jonas B. Lim	59	http://activemq.apache.org/	58
Apache ActiveMQ	1582357	13938	Java	Kevin Earls	60	http://activemq.apache.org/	58
Apache ActiveMQ	1582357	13938	Java	Dejan Bosanac	63	http://activemq.apache.org/	58
Apache ActiveMQ	1582357	13938	Java	hadrian	66	http://activemq.apache.org/	58
Apache ActiveMQ	1582357	13938	Java	gnodet	67	http://activemq.apache.org/	58
Apache ActiveMQ	1582357	13938	Java	cmacnaug	70	http://activemq.apache.org/	58
Apache ActiveMQ	1582357	13938	Java	Frederick G. Oconer	90	http://activemq.apache.org/	58
Apache ActiveMQ	1582357	13938	Java	Hiram Chirino	92	http://activemq.apache.org/	58
Apache ActiveMQ	1582357	13938	Java	Adrian T. Co	183	http://activemq.apache.org/	58
Apache ActiveMQ	1582357	13938	Java	jstrachan	283	http://activemq.apache.org/	58
Apache ActiveMQ	1582357	13938	Java	davsclaus	373	http://activemq.apache.org/	58
Apache ActiveMQ	1582357	13938	Java	James Strachan	916	http://activemq.apache.org/	58
Apache ActiveMQ	1582357	13938	Java	Bosanac Dejan	942	http://activemq.apache.org/	58
Apache ActiveMQ	1582357	13938	Java	dejanb	982	http://activemq.apache.org/	58
Apache ActiveMQ	1582357	13938	Java	chirino	1316	http://activemq.apache.org/	58
Apache ActiveMQ	1582357	13938	Java	Hiram R. Chirino	1408	http://activemq.apache.org/	58
Apache ActiveMQ	1582357	13938	Java	tabish	1844	http://activemq.apache.org/	58
Apache ActiveMQ	1582357	13938	Java	rajdavies	2120	http://activemq.apache.org/	58
Apache ActiveMQ	1582357	13938	Java	gtully	2529	http://activemq.apache.org/	58
Apache ActiveMQ-CPP	207547	3110	C++	Henri Yandell	1	http://activemq.apache.org/cms/	5
Apache ActiveMQ-CPP	207547	3110	C++	James Strachan	3	http://activemq.apache.org/cms/	5
Apache ActiveMQ-CPP	207547	3110	C++	Hiram R. Chirino	27	http://activemq.apache.org/cms/	5
Apache ActiveMQ-CPP	207547	3110	C++	Nathan Christopher Mittler	205	http://activemq.apache.org/cms/	5
Apache ActiveMQ-CPP	207547	3110	C++	Timothy Bish	2874	http://activemq.apache.org/cms/	5
Apache Airavata	169706	3072	Java	shahani	1	http://airavata.apache.org	17
Apache Airavata	169706	3072	Java	gmcdonald	2	http://airavata.apache.org	17
Apache Airavata	169706	3072	Java	mattmann	2	http://airavata.apache.org	17
Apache Airavata	169706	3072	Java	pctony	2	http://airavata.apache.org	17
Apache Airavata	169706	3072	Java	thilina	6	http://airavata.apache.org	17
Apache Airavata	169706	3072	Java	mpierce	11	http://airavata.apache.org	17
Apache Airavata	169706	3072	Java	rgardler	11	http://airavata.apache.org	17
Apache Airavata	169706	3072	Java	aslom	13	http://airavata.apache.org	17
Apache Airavata	169706	3072	Java	amilaj	77	http://airavata.apache.org	17
Apache Airavata	169706	3072	Java	chathura	105	http://airavata.apache.org	17
Apache Airavata	169706	3072	Java	raminder	156	http://airavata.apache.org	17
Apache Airavata	169706	3072	Java	patanachai	190	http://airavata.apache.org	17
Apache Airavata	169706	3072	Java	chathuri	213	http://airavata.apache.org	17
Apache Airavata	169706	3072	Java	smarru	353	http://airavata.apache.org	17
Apache Airavata	169706	3072	Java	samindaw	455	http://airavata.apache.org	17
Apache Airavata	169706	3072	Java	heshan	489	http://airavata.apache.org	17
Apache Airavata	169706	3072	Java	lahiru	986	http://airavata.apache.org	17
Apache Ant	226589	13027	Java	akv	1	http://ant.apache.org	48
Apache Ant	226589	13027	Java	cduffy	1	http://ant.apache.org	48
Apache Ant	226589	13027	Java	Daniel Ferrin	1	http://ant.apache.org	48
Apache Ant	226589	13027	Java	Jan Materne	1	http://ant.apache.org	48
Apache Ant	226589	13027	Java	Pier Fumagalli	1	http://ant.apache.org	48
Apache Ant	226589	13027	Java	preston	1	http://ant.apache.org	48
Apache Ant	226589	13027	Java	Xavier Hanin	1	http://ant.apache.org	48
Apache Ant	226589	13027	Java	Craig R. McClanahan	3	http://ant.apache.org	48
Apache Ant	226589	13027	Java	Jason Hunter	3	http://ant.apache.org	48
Apache Ant	226589	13027	Java	Jonathan K. Schneider	4	http://ant.apache.org	48
Apache Ant	226589	13027	Java	Dominique Devienne	7	http://ant.apache.org	48
Apache Ant	226589	13027	Java	Alexey N. Solofnenko	8	http://ant.apache.org	48
Apache Ant	226589	13027	Java	Maarten Coene	8	http://ant.apache.org	48
Apache Ant	226589	13027	Java	mclarke	12	http://ant.apache.org	48
Apache Ant	226589	13027	Java	Scokart Gilles	13	http://ant.apache.org	48
Apache Ant	226589	13027	Java	Arnout J. Kuiper	14	http://ant.apache.org	48
Apache Ant	226589	13027	Java	nickdavis	17	http://ant.apache.org	48
Apache Ant	226589	13027	Java	Bruce Atherton	18	http://ant.apache.org	48
Apache Ant	226589	13027	Java	Darrell DeBoer	18	http://ant.apache.org	48
Apache Ant	226589	13027	Java	James Duncan Davidson	19	http://ant.apache.org	48
Apache Ant	226589	13027	Java	Jesse Stockall	22	http://ant.apache.org	48
Apache Ant	226589	13027	Java	Jon Scott Stevens	22	http://ant.apache.org	48
Apache Ant	226589	13027	Java	Christoph Wilhelms	24	http://ant.apache.org	48
Apache Ant	226589	13027	Java	Stefano Mazzocchi	27	http://ant.apache.org	48
Apache Ant	226589	13027	Java	Steven M. Cohen	27	http://ant.apache.org	48
Apache Ant	226589	13027	Java	glennm	34	http://ant.apache.org	48
Apache Ant	226589	13027	Java	Nico Seessle	36	http://ant.apache.org	48
Apache Ant	226589	13027	Java	Jon Skeet	37	http://ant.apache.org	48
Apache Ant	226589	13027	Java	Nicolas Lalevee	71	http://ant.apache.org	48
Apache Ant	226589	13027	Java	Diane Holt	90	http://ant.apache.org	48
Apache Ant	226589	13027	Java	metasim	90	http://ant.apache.org	48
Apache Ant	226589	13027	Java	Sam Ruby	104	http://ant.apache.org	48
Apache Ant	226589	13027	Java	adammurdoch	148	http://ant.apache.org	48
Apache Ant	226589	13027	Java	Costin Manolache	154	http://ant.apache.org	48
Apache Ant	226589	13027	Java	Kevin Jackson	169	http://ant.apache.org	48
Apache Ant	226589	13027	Java	Erik Hatcher	188	http://ant.apache.org	48
Apache Ant	226589	13027	Java	Magesh Umasankar	231	http://ant.apache.org	48
Apache Ant	226589	13027	Java	Jacobus Martinus Kruithof	244	http://ant.apache.org	48
Apache Ant	226589	13027	Java	Jesse N. Glick	274	http://ant.apache.org	48
Apache Ant	226589	13027	Java	Stephane Bailliez	348	http://ant.apache.org	48
Apache Ant	226589	13027	Java	Jan Materne	403	http://ant.apache.org	48
Apache Ant	226589	13027	Java	Antoine Levy-Lambert	691	http://ant.apache.org	48
Apache Ant	226589	13027	Java	Steve Loughran	727	http://ant.apache.org	48
Apache Ant	226589	13027	Java	Conor MacNeill	918	http://ant.apache.org	48
Apache Ant	226589	13027	Java	Matthew Jason Benson	975	http://ant.apache.org	48
Apache Ant	226589	13027	Java	Peter Reilly	1095	http://ant.apache.org	48
Apache Ant	226589	13027	Java	Peter Donald	1546	http://ant.apache.org	48
Apache Ant	226589	13027	Java	Stefan Bodewig	4180	http://ant.apache.org	48
Apache AntUnit	8317	197	Java	Antoine Levy-Lambert	1	http://ant.apache.org/antlibs/antunit/	11
Apache AntUnit	8317	197	Java	Jacobus Martinus Kruithof	1	http://ant.apache.org/antlibs/antunit/	11
Apache AntUnit	8317	197	Java	Nicolas Lalevee	2	http://ant.apache.org/antlibs/antunit/	11
Apache AntUnit	8317	197	Java	Peter Reilly	2	http://ant.apache.org/antlibs/antunit/	11
Apache AntUnit	8317	197	Java	Jan Materne	3	http://ant.apache.org/antlibs/antunit/	11
Apache AntUnit	8317	197	Java	Steve Loughran	6	http://ant.apache.org/antlibs/antunit/	11
Apache AntUnit	8317	197	Java	Jan Materne	7	http://ant.apache.org/antlibs/antunit/	11
Apache AntUnit	8317	197	Java	Kevin Jackson	10	http://ant.apache.org/antlibs/antunit/	11
Apache AntUnit	8317	197	Java	Matthew Jason Benson	15	http://ant.apache.org/antlibs/antunit/	11
Apache AntUnit	8317	197	Java	Scokart Gilles	23	http://ant.apache.org/antlibs/antunit/	11
Apache AntUnit	8317	197	Java	Stefan Bodewig	127	http://ant.apache.org/antlibs/antunit/	11
Apache Any23	61055	1423	Java	sarahp098	1	http://code.google.com/p/any23	17
Apache Any23	61055	1423	Java	scor	1	http://code.google.com/p/any23	17
Apache Any23	61055	1423	Java	Szymon Danielczyk	1	http://code.google.com/p/any23	17
Apache Any23	61055	1423	Java	Tony Stevenson	1	http://code.google.com/p/any23	17
Apache Any23	61055	1423	Java	Lev Khomich	2	http://code.google.com/p/any23	17
Apache Any23	61055	1423	Java	olamy	2	http://code.google.com/p/any23	17
Apache Any23	61055	1423	Java	Eugene Dzhurinsky	3	http://code.google.com/p/any23	17
Apache Any23	61055	1423	Java	levkhomich	3	http://code.google.com/p/any23	17
Apache Any23	61055	1423	Java	pirroh	10	http://code.google.com/p/any23	17
Apache Any23	61055	1423	Java	lewismc	31	http://code.google.com/p/any23	17
Apache Any23	61055	1423	Java	Lewis John McGibbney	52	http://code.google.com/p/any23	17
Apache Any23	61055	1423	Java	juer...@umbrich.net	55	http://code.google.com/p/any23	17
Apache Any23	61055	1423	Java	Peter Ansell	65	http://code.google.com/p/any23	17
Apache Any23	61055	1423	Java	rich...@cyganiak.de	104	http://code.google.com/p/any23	17
Apache Any23	61055	1423	Java	Davide Palmisano	123	http://code.google.com/p/any23	17
Apache Any23	61055	1423	Java	Simone Tripodi	340	http://code.google.com/p/any23	17
Apache Any23	61055	1423	Java	michele.mostarda	628	http://code.google.com/p/any23	17
Apache Apollo	93815	2227	Scala	Guillaume Nodet	1	http://activemq.apache.org/apollo	11
Apache Apollo	93815	2227	Scala	Robert Davies	1	http://activemq.apache.org/apollo	11
Apache Apollo	93815	2227	Scala	David Jencks	2	http://activemq.apache.org/apollo	11
Apache Apollo	93815	2227	Scala	Gary Tully	2	http://activemq.apache.org/apollo	11
Apache Apollo	93815	2227	Scala	leiqin	2	http://activemq.apache.org/apollo	11
Apache Apollo	93815	2227	Scala	Bosanac Dejan	21	http://activemq.apache.org/apollo	11
Apache Apollo	93815	2227	Scala	Timothy A. Bish	23	http://activemq.apache.org/apollo	11
Apache Apollo	93815	2227	Scala	Christian Posta	25	http://activemq.apache.org/apollo	11
Apache Apollo	93815	2227	Scala	Hiram Chirino	41	http://activemq.apache.org/apollo	11
Apache Apollo	93815	2227	Scala	Colin W Macnaughton	66	http://activemq.apache.org/apollo	11
Apache Apollo	93815	2227	Scala	Hiram R. Chirino	2043	http://activemq.apache.org/apollo	11
Apache Archiva	2732441	11276	Java	brianf	1	http://archiva.apache.org	40
Apache Archiva	2732441	11276	Java	Eric	1	http://archiva.apache.org	40
Apache Archiva	2732441	11276	Java	hboutemy	1	http://archiva.apache.org	40
Apache Archiva	2732441	11276	Java	vsiveton	1	http://archiva.apache.org	40
Apache Archiva	2732441	11276	Java	alecharp	2	http://archiva.apache.org	40
Apache Archiva	2732441	11276	Java	Fabrizio Giustina	2	http://archiva.apache.org	40
Apache Archiva	2732441	11276	Java	John Dennis Casey	2	http://archiva.apache.org	40
Apache Archiva	2732441	11276	Java	Martin Cooper	2	http://archiva.apache.org	40
Apache Archiva	2732441	11276	Java	Sascha Vogt	2	http://archiva.apache.org	40
Apache Archiva	2732441	11276	Java	Andrew Williams	4	http://archiva.apache.org	40
Apache Archiva	2732441	11276	Java	jbonofre	4	http://archiva.apache.org	40
Apache Archiva	2732441	11276	Java	Jean-Baptiste Onofre	6	http://archiva.apache.org	40
Apache Archiva	2732441	11276	Java	Kenney Westerhof	6	http://archiva.apache.org	40
Apache Archiva	2732441	11276	Java	aheritier	7	http://archiva.apache.org	40
Apache Archiva	2732441	11276	Java	oching	7	http://archiva.apache.org	40
Apache Archiva	2732441	11276	Java	Dennis Lundberg	8	http://archiva.apache.org	40
Apache Archiva	2732441	11276	Java	Ernesto S. Tolentino Jr	8	http://archiva.apache.org	40
Apache Archiva	2732441	11276	Java	joakime	16	http://archiva.apache.org	40
Apache Archiva	2732441	11276	Java	Eric Barboni	18	http://archiva.apache.org	40
Apache Archiva	2732441	11276	Java	jdumay	18	http://archiva.apache.org	40
Apache Archiva	2732441	11276	Java	Fabrice Bellingard	24	http://archiva.apache.org	40
Apache Archiva	2732441	11276	Java	Arnaud Heritier	26	http://archiva.apache.org	40
Apache Archiva	2732441	11276	Java	Marecor M. Baclay	26	http://archiva.apache.org	40
Apache Archiva	2732441	11276	Java	Nicolas De Loof	38	http://archiva.apache.org	40
Apache Archiva	2732441	11276	Java	Jevica Arianne B. Zurbano	45	http://archiva.apache.org	40
Apache Archiva	2732441	11276	Java	carlos	62	http://archiva.apache.org	40
Apache Archiva	2732441	11276	Java	brett	80	http://archiva.apache.org	40
Apache Archiva	2732441	11276	Java	Henri Yandell	86	http://archiva.apache.org	40
Apache Archiva	2732441	11276	Java	skygo	104	http://archiva.apache.org	40
Apache Archiva	2732441	11276	Java	Wendy Smoak	138	http://archiva.apache.org	40
Apache Archiva	2732441	11276	Java	Jesse McConnell	212	http://archiva.apache.org	40
Apache Archiva	2732441	11276	Java	Carlos Sanchez Gonzalez	218	http://archiva.apache.org	40
Apache Archiva	2732441	11276	Java	Emmanuel Venisse	220	http://archiva.apache.org	40
Apache Archiva	2732441	11276	Java	James William Dumay	226	http://archiva.apache.org	40
Apache Archiva	2732441	11276	Java	Jason van Zyl	260	http://archiva.apache.org	40
Apache Archiva	2732441	11276	Java	Edwin L. Punzalan	350	http://archiva.apache.org	40
Apache Archiva	2732441	11276	Java	Joakim Erdfelt	830	http://archiva.apache.org	40
Apache Archiva	2732441	11276	Java	Maria Odea B. Ching	1098	http://archiva.apache.org	40
Apache Archiva	2732441	11276	Java	Brett Porter	2471	http://archiva.apache.org	40
Apache Archiva	2732441	11276	Java	olamy	4646	http://archiva.apache.org	40
Apache Aries	184906	3599	Java	gmcdonald	1	http://aries.apache.org	34
Apache Aries	184906	3599	Java	kevan	1	http://aries.apache.org	34
Apache Aries	184906	3599	Java	ngn	1	http://aries.apache.org	34
Apache Aries	184906	3599	Java	fmeschbe	2	http://aries.apache.org	34
Apache Aries	184906	3599	Java	irobins	2	http://aries.apache.org	34
Apache Aries	184906	3599	Java	dims	3	http://aries.apache.org	34
Apache Aries	184906	3599	Java	rickmcguire	3	http://aries.apache.org	34
Apache Aries	184906	3599	Java	violetagg	3	http://aries.apache.org	34
Apache Aries	184906	3599	Java	cschneider	6	http://aries.apache.org	34
Apache Aries	184906	3599	Java	rwonly	7	http://aries.apache.org	34
Apache Aries	184906	3599	Java	adc	10	http://aries.apache.org	34
Apache Aries	184906	3599	Java	sergeyb	10	http://aries.apache.org	34
Apache Aries	184906	3599	Java	jbonofre	16	http://aries.apache.org	34
Apache Aries	184906	3599	Java	cwilkin	18	http://aries.apache.org	34
Apache Aries	184906	3599	Java	atk	23	http://aries.apache.org	34
Apache Aries	184906	3599	Java	gcc	31	http://aries.apache.org	34
Apache Aries	184906	3599	Java	ozzy	35	http://aries.apache.org	34
Apache Aries	184906	3599	Java	awojtuniak	36	http://aries.apache.org	34
Apache Aries	184906	3599	Java	djencks	66	http://aries.apache.org	34
Apache Aries	184906	3599	Java	ejiang	75	http://aries.apache.org	34
Apache Aries	184906	3599	Java	gawor	116	http://aries.apache.org	34
Apache Aries	184906	3599	Java	linsun	131	http://aries.apache.org	34
Apache Aries	184906	3599	Java	jbohn	141	http://aries.apache.org	34
Apache Aries	184906	3599	Java	mahrwald	178	http://aries.apache.org	34
Apache Aries	184906	3599	Java	hughesj	209	http://aries.apache.org	34
Apache Aries	184906	3599	Java	gnodet	218	http://aries.apache.org	34
Apache Aries	184906	3599	Java	jwross	234	http://aries.apache.org	34
Apache Aries	184906	3599	Java	not	238	http://aries.apache.org	34
Apache Aries	184906	3599	Java	dkulp	239	http://aries.apache.org	34
Apache Aries	184906	3599	Java	mnuttall	279	http://aries.apache.org	34
Apache Aries	184906	3599	Java	zoe	283	http://aries.apache.org	34
Apache Aries	184906	3599	Java	davidb	289	http://aries.apache.org	34
Apache Aries	184906	3599	Java	timothyjward	337	http://aries.apache.org	34
Apache Aries	184906	3599	Java	cumminsh	358	http://aries.apache.org	34
Apache Avalon	155471	10673	Java	aaron	1	http://avalon.apache.org	81
Apache Avalon	155471	10673	Java	conor	1	http://avalon.apache.org	81
Apache Avalon	155471	10673	Java	ghoward	1	http://avalon.apache.org	81
Apache Avalon	155471	10673	Java	gregames	1	http://avalon.apache.org	81
Apache Avalon	155471	10673	Java	ianh	1	http://avalon.apache.org	81
Apache Avalon	155471	10673	Java	jsl	1	http://avalon.apache.org	81
Apache Avalon	155471	10673	Java	mschier	1	http://avalon.apache.org	81
Apache Avalon	155471	10673	Java	pepper	1	http://avalon.apache.org	81
Apache Avalon	155471	10673	Java	rubys	1	http://avalon.apache.org	81
Apache Avalon	155471	10673	Java	sctemme	1	http://avalon.apache.org	81
Apache Avalon	155471	10673	Java	stephan	1	http://avalon.apache.org	81
Apache Avalon	155471	10673	Java	ake	2	http://avalon.apache.org	81
Apache Avalon	155471	10673	Java	lars	2	http://avalon.apache.org	81
Apache Avalon	155471	10673	Java	unico	2	http://avalon.apache.org	81
Apache Avalon	155471	10673	Java	gozer	3	http://avalon.apache.org	81
Apache Avalon	155471	10673	Java	gstein	3	http://avalon.apache.org	81
Apache Avalon	155471	10673	Java	jwoolley	3	http://avalon.apache.org	81
Apache Avalon	155471	10673	Java	mccreedy	3	http://avalon.apache.org	81
Apache Avalon	155471	10673	Java	mjc	3	http://avalon.apache.org	81
Apache Avalon	155471	10673	Java	morpheus	3	http://avalon.apache.org	81
Apache Avalon	155471	10673	Java	ramc	3	http://avalon.apache.org	81
Apache Avalon	155471	10673	Java	fede	4	http://avalon.apache.org	81
Apache Avalon	155471	10673	Java	theory	4	http://avalon.apache.org	81
Apache Avalon	155471	10673	Java	vinayc	4	http://avalon.apache.org	81
Apache Avalon	155471	10673	Java	rbowen	5	http://avalon.apache.org	81
Apache Avalon	155471	10673	Java	froehlich	6	http://avalon.apache.org	81
Apache Avalon	155471	10673	Java	maczniak	6	http://avalon.apache.org	81
Apache Avalon	155471	10673	Java	grisha	7	http://avalon.apache.org	81
Apache Avalon	155471	10673	Java	martin	7	http://avalon.apache.org	81
Apache Avalon	155471	10673	Java	sylvain	9	http://avalon.apache.org	81
Apache Avalon	155471	10673	Java	jfclere	10	http://avalon.apache.org	81
Apache Avalon	155471	10673	Java	jim	12	http://avalon.apache.org	81
Apache Avalon	155471	10673	Java	bruno	13	http://avalon.apache.org	81
Apache Avalon	155471	10673	Java	cfieber	14	http://avalon.apache.org	81
Apache Avalon	155471	10673	Java	vgritsenko	14	http://avalon.apache.org	81
Apache Avalon	155471	10673	Java	clar	15	http://avalon.apache.org	81
Apache Avalon	155471	10673	Java	kawai	17	http://avalon.apache.org	81
Apache Avalon	155471	10673	Java	striker	17	http://avalon.apache.org	81
Apache Avalon	155471	10673	Java	giacomo	18	http://avalon.apache.org	81
Apache Avalon	155471	10673	Java	charlesb	19	http://avalon.apache.org	81
Apache Avalon	155471	10673	Java	niq	19	http://avalon.apache.org	81
Apache Avalon	155471	10673	Java	atagunov	20	http://avalon.apache.org	81
Apache Avalon	155471	10673	Java	slive	22	http://avalon.apache.org	81
Apache HTTP Server	2277628	94588	C	pqf	1	http://httpd.apache.org/	114
Apache Avalon	155471	10673	Java	akarasulu	28	http://avalon.apache.org	81
Apache Avalon	155471	10673	Java	huw	29	http://avalon.apache.org	81
Apache Avalon	155471	10673	Java	minfrin	31	http://avalon.apache.org	81
Apache Avalon	155471	10673	Java	geoff	35	http://avalon.apache.org	81
Apache Avalon	155471	10673	Java	randyk	38	http://avalon.apache.org	81
Apache Avalon	155471	10673	Java	kess	40	http://avalon.apache.org	81
Apache Avalon	155471	10673	Java	stoddard	44	http://avalon.apache.org	81
Apache Avalon	155471	10673	Java	neeme	45	http://avalon.apache.org	81
Apache Avalon	155471	10673	Java	farra	47	http://avalon.apache.org	81
Apache Avalon	155471	10673	Java	jerenkrantz	48	http://avalon.apache.org	81
Apache Avalon	155471	10673	Java	trawick	48	http://avalon.apache.org	81
Apache Avalon	155471	10673	Java	tbennett	50	http://avalon.apache.org	81
Apache Avalon	155471	10673	Java	stas	55	http://avalon.apache.org	81
Apache Avalon	155471	10673	Java	yoshiki	58	http://avalon.apache.org	81
Apache Avalon	155471	10673	Java	bnicholes	69	http://avalon.apache.org	81
Apache Avalon	155471	10673	Java	mturk	77	http://avalon.apache.org	81
Apache Avalon	155471	10673	Java	mirceatoma	83	http://avalon.apache.org	81
Apache Avalon	155471	10673	Java	nicolaken	89	http://avalon.apache.org	81
Apache Avalon	155471	10673	Java	wrowe	97	http://avalon.apache.org	81
Apache Avalon	155471	10673	Java	jorton	99	http://avalon.apache.org	81
Apache Avalon	155471	10673	Java	crafterm	106	http://avalon.apache.org	81
Apache Avalon	155471	10673	Java	leosutic	118	http://avalon.apache.org	81
Apache Avalon	155471	10673	Java	oberhack	128	http://avalon.apache.org	81
Apache Avalon	155471	10673	Java	hammett	129	http://avalon.apache.org	81
Apache Avalon	155471	10673	Java	joes	166	http://avalon.apache.org	81
Apache Avalon	155471	10673	Java	jefft	183	http://avalon.apache.org	81
Apache Avalon	155471	10673	Java	nd	184	http://avalon.apache.org	81
Apache Avalon	155471	10673	Java	cziegeler	210	http://avalon.apache.org	81
Apache Avalon	155471	10673	Java	colus	222	http://avalon.apache.org	81
Apache Avalon	155471	10673	Java	proyal	236	http://avalon.apache.org	81
Apache Avalon	155471	10673	Java	leif	324	http://avalon.apache.org	81
Apache Avalon	155471	10673	Java	leosimons	337	http://avalon.apache.org	81
Apache Avalon	155471	10673	Java	hammant	410	http://avalon.apache.org	81
Apache Avalon	155471	10673	Java	niclas	724	http://avalon.apache.org	81
Apache Avalon	155471	10673	Java	bloritsch	965	http://avalon.apache.org	81
Apache Avalon	155471	10673	Java	mcconnell	2095	http://avalon.apache.org	81
Apache Avalon	155471	10673	Java	donaldp	2677	http://avalon.apache.org	81
Apache Axiom	116655	2646	Java	barrettj	1	http://ws.apache.org/commons/axiom/index.html	31
Apache Axiom	116655	2646	Java	chamikara	1	http://ws.apache.org/commons/axiom/index.html	31
Apache Axiom	116655	2646	Java	danushka	1	http://ws.apache.org/commons/axiom/index.html	31
Apache Axiom	116655	2646	Java	hemapani	1	http://ws.apache.org/commons/axiom/index.html	31
Apache Axiom	116655	2646	Java	ngallardo	1	http://ws.apache.org/commons/axiom/index.html	31
Apache Axiom	116655	2646	Java	saminda	1	http://ws.apache.org/commons/axiom/index.html	31
Apache Axiom	116655	2646	Java	asankha	2	http://ws.apache.org/commons/axiom/index.html	31
Apache Axiom	116655	2646	Java	sagara	2	http://ws.apache.org/commons/axiom/index.html	31
Apache Axiom	116655	2646	Java	amilas	4	http://ws.apache.org/commons/axiom/index.html	31
Apache Axiom	116655	2646	Java	dsosnoski	4	http://ws.apache.org/commons/axiom/index.html	31
Apache Axiom	116655	2646	Java	nagy	4	http://ws.apache.org/commons/axiom/index.html	31
Apache Axiom	116655	2646	Java	senaka	4	http://ws.apache.org/commons/axiom/index.html	31
Apache Axiom	116655	2646	Java	pradine	5	http://ws.apache.org/commons/axiom/index.html	31
Apache Axiom	116655	2646	Java	azeez	6	http://ws.apache.org/commons/axiom/index.html	31
Apache Axiom	116655	2646	Java	chatra	6	http://ws.apache.org/commons/axiom/index.html	31
Apache Axiom	116655	2646	Java	woodroy	6	http://ws.apache.org/commons/axiom/index.html	31
Apache Axiom	116655	2646	Java	deepal	9	http://ws.apache.org/commons/axiom/index.html	31
Apache Axiom	116655	2646	Java	davidillsley	10	http://ws.apache.org/commons/axiom/index.html	31
Apache Axiom	116655	2646	Java	sanka	10	http://ws.apache.org/commons/axiom/index.html	31
Apache Axiom	116655	2646	Java	nandana	11	http://ws.apache.org/commons/axiom/index.html	31
Apache Axiom	116655	2646	Java	ajith	13	http://ws.apache.org/commons/axiom/index.html	31
Apache Axiom	116655	2646	Java	nthaker	13	http://ws.apache.org/commons/axiom/index.html	31
Apache Axiom	116655	2646	Java	jochen	27	http://ws.apache.org/commons/axiom/index.html	31
Apache Axiom	116655	2646	Java	gdaniels	28	http://ws.apache.org/commons/axiom/index.html	31
Apache Axiom	116655	2646	Java	gawor	37	http://ws.apache.org/commons/axiom/index.html	31
Apache Axiom	116655	2646	Java	thilina	53	http://ws.apache.org/commons/axiom/index.html	31
Apache Axiom	116655	2646	Java	ruchithf	58	http://ws.apache.org/commons/axiom/index.html	31
Apache Axiom	116655	2646	Java	scheu	142	http://ws.apache.org/commons/axiom/index.html	31
Apache Axiom	116655	2646	Java	dims	152	http://ws.apache.org/commons/axiom/index.html	31
Apache Axiom	116655	2646	Java	chinthaka	180	http://ws.apache.org/commons/axiom/index.html	31
Apache Axiom	116655	2646	Java	veithen	1854	http://ws.apache.org/commons/axiom/index.html	31
Apache Batik	223938	639	Java	lbernardo	1	http://xmlgraphics.apache.org/batik/	8
Apache Batik	223938	639	Java	jeremias	7	http://xmlgraphics.apache.org/batik/	8
Apache Batik	223938	639	Java	vhennebert	7	http://xmlgraphics.apache.org/batik/	8
Apache Batik	223938	639	Java	clay	8	http://xmlgraphics.apache.org/batik/	8
Apache Batik	223938	639	Java	helder	25	http://xmlgraphics.apache.org/batik/	8
Apache Batik	223938	639	Java	dvholten	92	http://xmlgraphics.apache.org/batik/	8
Apache Batik	223938	639	Java	deweese	110	http://xmlgraphics.apache.org/batik/	8
Apache Batik	223938	639	Java	cam	389	http://xmlgraphics.apache.org/batik/	8
Apache Bean Scripting Framework	14776	357	Java	henning	2	http://jakarta.apache.org/bsf/	10
Apache Bean Scripting Framework	14776	357	Java	rahul	3	http://jakarta.apache.org/bsf/	10
Apache Bean Scripting Framework	14776	357	Java	sanjiva	4	http://jakarta.apache.org/bsf/	10
Apache Bean Scripting Framework	14776	357	Java	bayard	11	http://jakarta.apache.org/bsf/	10
Apache Bean Scripting Framework	14776	357	Java	sanka	33	http://jakarta.apache.org/bsf/	10
Apache Bean Scripting Framework	14776	357	Java	chuck	36	http://jakarta.apache.org/bsf/	10
Apache Bean Scripting Framework	14776	357	Java	rony	38	http://jakarta.apache.org/bsf/	10
Apache Bean Scripting Framework	14776	357	Java	orlikowski	51	http://jakarta.apache.org/bsf/	10
Apache Bean Scripting Framework	14776	357	Java	antelder	73	http://jakarta.apache.org/bsf/	10
Apache Bean Scripting Framework	14776	357	Java	sebb	106	http://jakarta.apache.org/bsf/	10
Apache Buildr	63962	4690	Ruby	Joe Schaefer	1	http://buildr.apache.org	16
Apache Buildr	63962	4690	Ruby	joes	1	http://buildr.apache.org	16
Apache Buildr	63962	4690	Ruby	Matthieu Riou	11	http://buildr.apache.org	16
Apache Buildr	63962	4690	Ruby	mriou	11	http://buildr.apache.org	16
Apache Buildr	63962	4690	Ruby	Antoine Contal	101	http://buildr.apache.org	16
Apache Buildr	63962	4690	Ruby	lacton	101	http://buildr.apache.org	16
Apache Buildr	63962	4690	Ruby	Daniel Spiewak	155	http://buildr.apache.org	16
Apache Buildr	63962	4690	Ruby	djspiewak	155	http://buildr.apache.org	16
Apache Buildr	63962	4690	Ruby	Antoine Toulme	175	http://buildr.apache.org	16
Apache Buildr	63962	4690	Ruby	toulmean	175	http://buildr.apache.org	16
Apache Buildr	63962	4690	Ruby	vborja	238	http://buildr.apache.org	16
Apache Buildr	63962	4690	Ruby	Victor Borja	238	http://buildr.apache.org	16
Apache Buildr	63962	4690	Ruby	assaf	530	http://buildr.apache.org	16
Apache Buildr	63962	4690	Ruby	Assaf Arkin	530	http://buildr.apache.org	16
Apache Buildr	63962	4690	Ruby	boisvert	1024	http://buildr.apache.org	16
Apache Buildr	63962	4690	Ruby	donaldp	1244	http://buildr.apache.org	16
Apache C++ Standard Library	786377	6143	C++	fielding	3	http://stdcxx.apache.org/	10
Apache C++ Standard Library	786377	6143	C++	steleman	4	http://stdcxx.apache.org/	10
Apache C++ Standard Library	786377	6143	C++	wrowe	7	http://stdcxx.apache.org/	10
Apache C++ Standard Library	786377	6143	C++	lnicoara	24	http://stdcxx.apache.org/	10
Apache C++ Standard Library	786377	6143	C++	ablack	80	http://stdcxx.apache.org/	10
Apache C++ Standard Library	786377	6143	C++	elemings	113	http://stdcxx.apache.org/	10
Apache C++ Standard Library	786377	6143	C++	antonp	222	http://stdcxx.apache.org/	10
Apache C++ Standard Library	786377	6143	C++	vitek	227	http://stdcxx.apache.org/	10
Apache C++ Standard Library	786377	6143	C++	faridz	1311	http://stdcxx.apache.org/	10
Apache C++ Standard Library	786377	6143	C++	sebor	4152	http://stdcxx.apache.org/	10
Apache Camel	959655	19946	Java	aco	1	http://camel.apache.org/	88
Apache Camel	959655	19946	Java	Adrian T. Co	1	http://camel.apache.org/	88
Apache Camel	959655	19946	Java	Alexander Lomov	1	http://camel.apache.org/	88
Apache Camel	959655	19946	Java	ancosen	1	http://camel.apache.org/	88
Apache Camel	959655	19946	Java	Bruce Snyder	1	http://camel.apache.org/	88
Apache Camel	959655	19946	Java	bsnyder	1	http://camel.apache.org/	88
Apache Camel	959655	19946	Java	carlo	1	http://camel.apache.org/	88
Apache Camel	959655	19946	Java	Clement Tamisier	1	http://camel.apache.org/	88
Apache Camel	959655	19946	Java	david	1	http://camel.apache.org/	88
Apache Camel	959655	19946	Java	David J. M. Karlsen	1	http://camel.apache.org/	88
Apache Camel	959655	19946	Java	Eduardo Macarron	1	http://camel.apache.org/	88
Apache Camel	959655	19946	Java	Fergus Nelson	1	http://camel.apache.org/	88
Apache Camel	959655	19946	Java	Geoffrey De Smet	1	http://camel.apache.org/	88
Apache Camel	959655	19946	Java	Hiram Chirino	1	http://camel.apache.org/	88
Apache Camel	959655	19946	Java	Jason Sherman	1	http://camel.apache.org/	88
Apache Camel	959655	19946	Java	Joe Schaefer	1	http://camel.apache.org/	88
Apache Camel	959655	19946	Java	joes	1	http://camel.apache.org/	88
Apache Camel	959655	19946	Java	Kevin Earls	1	http://camel.apache.org/	88
Apache Camel	959655	19946	Java	lldata	1	http://camel.apache.org/	88
Apache Camel	959655	19946	Java	Marco Zapletal	1	http://camel.apache.org/	88
Apache Camel	959655	19946	Java	neoramon	1	http://camel.apache.org/	88
Apache Camel	959655	19946	Java	perwalst	1	http://camel.apache.org/	88
Apache Camel	959655	19946	Java	Preben Asmussen	1	http://camel.apache.org/	88
Apache Camel	959655	19946	Java	Seiji Sogabe	1	http://camel.apache.org/	88
Apache Camel	959655	19946	Java	Tomohisa Igarashi	1	http://camel.apache.org/	88
Apache Camel	959655	19946	Java	Ashwin Karpe	2	http://camel.apache.org/	88
Apache Camel	959655	19946	Java	Carsten Erker	2	http://camel.apache.org/	88
Apache Camel	959655	19946	Java	David Keen	2	http://camel.apache.org/	88
Apache Camel	959655	19946	Java	Dhiraj Bokde	2	http://camel.apache.org/	88
Apache Camel	959655	19946	Java	Fabien Chaillou	2	http://camel.apache.org/	88
Apache Camel	959655	19946	Java	Freeman Fang	2	http://camel.apache.org/	88
Apache Camel	959655	19946	Java	ammulder	3	http://camel.apache.org/	88
Apache Camel	959655	19946	Java	Brett Meyer	3	http://camel.apache.org/	88
Apache Camel	959655	19946	Java	bvahdat	3	http://camel.apache.org/	88
Apache Camel	959655	19946	Java	Charles Moulliard	3	http://camel.apache.org/	88
Apache Camel	959655	19946	Java	Gary Tully	3	http://camel.apache.org/	88
Apache Camel	959655	19946	Java	Antoine DESSAIGNE	4	http://camel.apache.org/	88
Apache Camel	959655	19946	Java	Gerald Quintana	4	http://camel.apache.org/	88
Apache Camel	959655	19946	Java	James Carman	4	http://camel.apache.org/	88
Apache Camel	959655	19946	Java	James W. Carman	4	http://camel.apache.org/	88
Apache Camel	959655	19946	Java	Jean-Baptiste Onofre	4	http://camel.apache.org/	88
Apache Camel	959655	19946	Java	bibryam	5	http://camel.apache.org/	88
Apache Camel	959655	19946	Java	boday	5	http://camel.apache.org/	88
Apache Camel	959655	19946	Java	Charles Mouliard	5	http://camel.apache.org/	88
Apache Camel	959655	19946	Java	Christian Posta	6	http://camel.apache.org/	88
Apache Camel	959655	19946	Java	Raul Kripalani	6	http://camel.apache.org/	88
Apache Camel	959655	19946	Java	Aaron Mulder	7	http://camel.apache.org/	88
Apache Camel	959655	19946	Java	Stanley J. Lewis	7	http://camel.apache.org/	88
Apache Camel	959655	19946	Java	Tracy J. Snell	7	http://camel.apache.org/	88
Apache Camel	959655	19946	Java	Carl Johan Erik Edstrom	16	http://camel.apache.org/	88
Apache Camel	959655	19946	Java	Freeman Yue Fang	21	http://camel.apache.org/	88
Apache Camel	959655	19946	Java	jlim	21	http://camel.apache.org/	88
Apache Camel	959655	19946	Java	Jonas B. Lim	21	http://camel.apache.org/	88
Apache Camel	959655	19946	Java	romkal	24	http://camel.apache.org/	88
Apache Camel	959655	19946	Java	Gregor Zurowski	25	http://camel.apache.org/	88
Apache Camel	959655	19946	Java	Grzegorz Grzybek	29	http://camel.apache.org/	88
Apache Camel	959655	19946	Java	Jean-Baptiste Onofre	30	http://camel.apache.org/	88
Apache Camel	959655	19946	Java	Richard Kettelerij	30	http://camel.apache.org/	88
Apache Camel	959655	19946	Java	Benjamin P. O*Day	31	http://camel.apache.org/	88
Apache Camel	959655	19946	Java	Raul Kripalani	31	http://camel.apache.org/	88
Apache Camel	959655	19946	Java	David Brandon Valeri	34	http://camel.apache.org/	88
Apache Camel	959655	19946	Java	Ioannis Canellos	36	http://camel.apache.org/	88
Apache Camel	959655	19946	Java	wtam	37	http://camel.apache.org/	88
Apache Camel	959655	19946	Java	Bilgin Ismet Ibryam	38	http://camel.apache.org/	88
Apache Camel	959655	19946	Java	Roman Kalukiewicz	39	http://camel.apache.org/	88
Apache Camel	959655	19946	Java	Akitoshi Yoshida	41	http://camel.apache.org/	88
Apache Camel	959655	19946	Java	Scott England-Sullivan	41	http://camel.apache.org/	88
Apache Camel	959655	19946	Java	gnodet	44	http://camel.apache.org/	88
Apache Camel	959655	19946	Java	Martin Krasser	47	http://camel.apache.org/	88
Apache Camel	959655	19946	Java	Ashwin J. Karpe	64	http://camel.apache.org/	88
Apache Camel	959655	19946	Java	rajdavies	71	http://camel.apache.org/	88
Apache Camel	959655	19946	Java	Guillaume Nodet	95	http://camel.apache.org/	88
Apache Camel	959655	19946	Java	William Tam	98	http://camel.apache.org/	88
Apache Camel	959655	19946	Java	Henryk Konsek	115	http://camel.apache.org/	88
Apache Camel	959655	19946	Java	Moulliard Charles	130	http://camel.apache.org/	88
Apache Camel	959655	19946	Java	Christian Schneider	142	http://camel.apache.org/	88
Apache Camel	959655	19946	Java	gertv	173	http://camel.apache.org/	88
Apache Camel	959655	19946	Java	J. Daniel Kulp	173	http://camel.apache.org/	88
Apache Camel	959655	19946	Java	cmueller	174	http://camel.apache.org/	88
Apache Camel	959655	19946	Java	chirino	376	http://camel.apache.org/	88
Apache Camel	959655	19946	Java	Christian Mueller	476	http://camel.apache.org/	88
Apache Camel	959655	19946	Java	janstey	554	http://camel.apache.org/	88
Apache Camel	959655	19946	Java	Babak Vahdat	629	http://camel.apache.org/	88
Apache Camel	959655	19946	Java	hadrian	965	http://camel.apache.org/	88
Apache Camel	959655	19946	Java	jstrachan	2528	http://camel.apache.org/	88
Apache Camel	959655	19946	Java	ningjiang	4179	http://camel.apache.org/	88
Apache Camel	959655	19946	Java	davsclaus	8247	http://camel.apache.org/	88
Apache Chemistry	215557	2104	Java	timraff	1	http://chemistry.apache.org/	21
Apache Chemistry	215557	2104	Java	karstene	2	http://chemistry.apache.org/	21
Apache Chemistry	215557	2104	Java	pgoetz	2	http://chemistry.apache.org/	21
Apache Chemistry	215557	2104	Java	joes	4	http://chemistry.apache.org/	21
Apache Chemistry	215557	2104	Java	jukka	7	http://chemistry.apache.org/	21
Apache Chemistry	215557	2104	Java	sfermigier	9	http://chemistry.apache.org/	21
Apache Chemistry	215557	2104	Java	lgross	12	http://chemistry.apache.org/	21
Apache Chemistry	215557	2104	Java	peberlein	13	http://chemistry.apache.org/	21
Apache Chemistry	215557	2104	Java	jmpascal	15	http://chemistry.apache.org/	21
Apache Chemistry	215557	2104	Java	nick	17	http://chemistry.apache.org/	21
Apache Chemistry	215557	2104	Java	gavincornwell	19	http://chemistry.apache.org/	21
Apache Chemistry	215557	2104	Java	pweschmidt	19	http://chemistry.apache.org/	21
Apache Chemistry	215557	2104	Java	mduerig	21	http://chemistry.apache.org/	21
Apache Chemistry	215557	2104	Java	dcaruana	31	http://chemistry.apache.org/	21
Apache Chemistry	215557	2104	Java	richardm	39	http://chemistry.apache.org/	21
Apache Chemistry	215557	2104	Java	sklevenz	82	http://chemistry.apache.org/	21
Apache Chemistry	215557	2104	Java	jpotts	84	http://chemistry.apache.org/	21
Apache Chemistry	215557	2104	Java	fguillaume	109	http://chemistry.apache.org/	21
Apache Chemistry	215557	2104	Java	gabriele	132	http://chemistry.apache.org/	21
Apache Chemistry	215557	2104	Java	jens	379	http://chemistry.apache.org/	21
Apache Chemistry	215557	2104	Java	fmui	1107	http://chemistry.apache.org/	21
Apache Chukwa	81310	517	Java	ddas	1	http://hadoop.apache.org/chukwa	10
Apache Chukwa	81310	517	Java	johan	1	http://hadoop.apache.org/chukwa	10
Apache Chukwa	81310	517	Java	acmurthy	2	http://hadoop.apache.org/chukwa	10
Apache Chukwa	81310	517	Java	cutting	2	http://hadoop.apache.org/chukwa	10
Apache Chukwa	81310	517	Java	nigel	2	http://hadoop.apache.org/chukwa	10
Apache Chukwa	81310	517	Java	szetszwo	2	http://hadoop.apache.org/chukwa	10
Apache Chukwa	81310	517	Java	omalley	4	http://hadoop.apache.org/chukwa	10
Apache Chukwa	81310	517	Java	cdouglas	35	http://hadoop.apache.org/chukwa	10
Apache Chukwa	81310	517	Java	asrabkin	206	http://hadoop.apache.org/chukwa	10
Apache Chukwa	81310	517	Java	eyang	262	http://hadoop.apache.org/chukwa	10
Apache Click	47398	3062	Java	gmcdonald	2	http://click.apache.org/	10
Apache Click	47398	3062	Java	pbarnes	3	http://click.apache.org/	10
Apache Click	47398	3062	Java	shaberman	4	http://click.apache.org/	10
Apache Click	47398	3062	Java	chrisichris	20	http://click.apache.org/	10
Apache Click	47398	3062	Java	amohombe	24	http://click.apache.org/	10
Apache Click	47398	3062	Java	takezoe	51	http://click.apache.org/	10
Apache Click	47398	3062	Java	bckfnn	57	http://click.apache.org/	10
Apache Click	47398	3062	Java	aadrian	98	http://click.apache.org/	10
Apache Click	47398	3062	Java	sabob	1378	http://click.apache.org/	10
Apache Click	47398	3062	Java	malcolm_edgar	1425	http://click.apache.org/	10
Apache CloudStack	1540264	23569	Java	adefanti	1	http://cloudstack.apache.org	281
Apache CloudStack	1540264	23569	Java	afornie	1	http://cloudstack.apache.org	281
Apache CloudStack	1540264	23569	Java	al...@alexhitchins.com	1	http://cloudstack.apache.org	281
Apache CloudStack	1540264	23569	Java	amogh.vasekar	1	http://cloudstack.apache.org	281
Apache CloudStack	1540264	23569	Java	Andrew Bayer	1	http://cloudstack.apache.org	281
Apache CloudStack	1540264	23569	Java	Anish Kumar Bindal	1	http://cloudstack.apache.org	281
Apache CloudStack	1540264	23569	Java	Ashutosh	1	http://cloudstack.apache.org	281
Apache CloudStack	1540264	23569	Java	Atsushi Midorikawa	1	http://cloudstack.apache.org	281
Apache CloudStack	1540264	23569	Java	bharat kumar	1	http://cloudstack.apache.org	281
Apache CloudStack	1540264	23569	Java	Bill Rich	1	http://cloudstack.apache.org	281
Apache CloudStack	1540264	23569	Java	brito wang	1	http://cloudstack.apache.org	281
Apache CloudStack	1540264	23569	Java	Chandan Krishna Reddy Purushothama	1	http://cloudstack.apache.org	281
Apache CloudStack	1540264	23569	Java	Chandan Purushothama	1	http://cloudstack.apache.org	281
Apache CloudStack	1540264	23569	Java	Channy Yun	1	http://cloudstack.apache.org	281
Apache CloudStack	1540264	23569	Java	chriscameronv	1	http://cloudstack.apache.org	281
Apache CloudStack	1540264	23569	Java	Clayton Weise	1	http://cloudstack.apache.org	281
Apache CloudStack	1540264	23569	Java	Dariusz Nejbauer	1	http://cloudstack.apache.org	281
Apache CloudStack	1540264	23569	Java	David Bierce	1	http://cloudstack.apache.org	281
Apache CloudStack	1540264	23569	Java	dhoogland	1	http://cloudstack.apache.org	281
Apache CloudStack	1540264	23569	Java	Ding Yuan	1	http://cloudstack.apache.org	281
Apache CloudStack	1540264	23569	Java	Dmitry Batkovich	1	http://cloudstack.apache.org	281
Apache CloudStack	1540264	23569	Java	Edison Xu	1	http://cloudstack.apache.org	281
Apache CloudStack	1540264	23569	Java	eric pretorious	1	http://cloudstack.apache.org	281
Apache CloudStack	1540264	23569	Java	fjkdf	1	http://cloudstack.apache.org	281
Apache CloudStack	1540264	23569	Java	Frank.Zhang	1	http://cloudstack.apache.org	281
Apache CloudStack	1540264	23569	Java	Girish Chaudhari	1	http://cloudstack.apache.org	281
Apache CloudStack	1540264	23569	Java	Greenqloud	1	http://cloudstack.apache.org	281
Apache CloudStack	1540264	23569	Java	Hari Patanala	1	http://cloudstack.apache.org	281
Apache CloudStack	1540264	23569	Java	Hiroki Ohashi	1	http://cloudstack.apache.org	281
Apache CloudStack	1540264	23569	Java	Ian Service	1	http://cloudstack.apache.org	281
Apache CloudStack	1540264	23569	Java	Ilya Musayev, CloudSand.com	1	http://cloudstack.apache.org	281
Apache CloudStack	1540264	23569	Java	Jamshid Afshar	1	http://cloudstack.apache.org	281
Apache CloudStack	1540264	23569	Java	Jan-Arve Nygard	1	http://cloudstack.apache.org	281
Apache CloudStack	1540264	23569	Java	Jason Bausewein	1	http://cloudstack.apache.org	281
Apache CloudStack	1540264	23569	Java	jayapal	1	http://cloudstack.apache.org	281
Apache CloudStack	1540264	23569	Java	jeff	1	http://cloudstack.apache.org	281
Apache CloudStack	1540264	23569	Java	Jie Feng	1	http://cloudstack.apache.org	281
Apache CloudStack	1540264	23569	Java	Jijun	1	http://cloudstack.apache.org	281
Apache CloudStack	1540264	23569	Java	joesan	1	http://cloudstack.apache.org	281
Apache CloudStack	1540264	23569	Java	Jonathan Creasy	1	http://cloudstack.apache.org	281
Apache CloudStack	1540264	23569	Java	Justin Grudzien	1	http://cloudstack.apache.org	281
Apache CloudStack	1540264	23569	Java	kyrameng	1	http://cloudstack.apache.org	281
Apache CloudStack	1540264	23569	Java	lafferty	1	http://cloudstack.apache.org	281
Apache CloudStack	1540264	23569	Java	Leo Simons	1	http://cloudstack.apache.org	281
Apache CloudStack	1540264	23569	Java	Mandar Barve	1	http://cloudstack.apache.org	281
Apache CloudStack	1540264	23569	Java	Manikanta Kattamuri	1	http://cloudstack.apache.org	281
Apache CloudStack	1540264	23569	Java	Matty Courtney	1	http://cloudstack.apache.org	281
Apache CloudStack	1540264	23569	Java	mice xia	1	http://cloudstack.apache.org	281
Apache CloudStack	1540264	23569	Java	Miguel Ferreira	1	http://cloudstack.apache.org	281
Apache CloudStack	1540264	23569	Java	Mikhail Mikhaliov	1	http://cloudstack.apache.org	281
Apache CloudStack	1540264	23569	Java	monism	1	http://cloudstack.apache.org	281
Apache CloudStack	1540264	23569	Java	name=Radhika PC	1	http://cloudstack.apache.org	281
Apache CloudStack	1540264	23569	Java	Nicolas Lamirault	1	http://cloudstack.apache.org	281
Apache CloudStack	1540264	23569	Java	Nils	1	http://cloudstack.apache.org	281
Apache CloudStack	1540264	23569	Java	Olivier Lemasle	1	http://cloudstack.apache.org	281
Apache CloudStack	1540264	23569	Java	Ove Ewerlid	1	http://cloudstack.apache.org	281
Apache CloudStack	1540264	23569	Java	Pedro Marques	1	http://cloudstack.apache.org	281
Apache CloudStack	1540264	23569	Java	punith-cloudbyte	1	http://cloudstack.apache.org	281
Apache CloudStack	1540264	23569	Java	Radoslaw Smigielski	1	http://cloudstack.apache.org	281
Apache CloudStack	1540264	23569	Java	Rayeesn	1	http://cloudstack.apache.org	281
Apache CloudStack	1540264	23569	Java	Roeland Kuipers	1	http://cloudstack.apache.org	281
Apache CloudStack	1540264	23569	Java	Ron Wheeler	1	http://cloudstack.apache.org	281
Apache CloudStack	1540264	23569	Java	saksham	1	http://cloudstack.apache.org	281
Apache CloudStack	1540264	23569	Java	Sam Schmit	1	http://cloudstack.apache.org	281
Apache CloudStack	1540264	23569	Java	Sander Botman	1	http://cloudstack.apache.org	281
Apache CloudStack	1540264	23569	Java	Sangeetha	1	http://cloudstack.apache.org	281
Apache CloudStack	1540264	23569	Java	Sangeetha Hariharan	1	http://cloudstack.apache.org	281
Apache CloudStack	1540264	23569	Java	Sanjeev Neelarapu	1	http://cloudstack.apache.org	281
Apache CloudStack	1540264	23569	Java	Sebastien Goasquen	1	http://cloudstack.apache.org	281
Apache CloudStack	1540264	23569	Java	sedukull	1	http://cloudstack.apache.org	281
Apache CloudStack	1540264	23569	Java	Shane Witbeck	1	http://cloudstack.apache.org	281
Apache CloudStack	1540264	23569	Java	Shanker Balan	1	http://cloudstack.apache.org	281
Apache CloudStack	1540264	23569	Java	Soheil Eizadi	1	http://cloudstack.apache.org	281
Apache CloudStack	1540264	23569	Java	suresh	1	http://cloudstack.apache.org	281
Apache CloudStack	1540264	23569	Java	Syed	1	http://cloudstack.apache.org	281
Apache CloudStack	1540264	23569	Java	Tanner Danzey	1	http://cloudstack.apache.org	281
Apache CloudStack	1540264	23569	Java	Tim Mackey	1	http://cloudstack.apache.org	281
Apache CloudStack	1540264	23569	Java	tom...@midokura.jp	1	http://cloudstack.apache.org	281
Apache CloudStack	1540264	23569	Java	Tomoe Sugihara	1	http://cloudstack.apache.org	281
Apache CloudStack	1540264	23569	Java	toshiaki.hatano	1	http://cloudstack.apache.org	281
Apache CloudStack	1540264	23569	Java	Tuna	1	http://cloudstack.apache.org	281
Apache CloudStack	1540264	23569	Java	U-aprateek-PC\\aprateek	1	http://cloudstack.apache.org	281
Apache CloudStack	1540264	23569	Java	U-CITRITE\\\\koushikd	1	http://cloudstack.apache.org	281
Apache CloudStack	1540264	23569	Java	U-CITRITE\\vijayendra1	1	http://cloudstack.apache.org	281
Apache CloudStack	1540264	23569	Java	Upendra Moturi	1	http://cloudstack.apache.org	281
Apache CloudStack	1540264	23569	Java	Victor Rodionov	1	http://cloudstack.apache.org	281
Apache CloudStack	1540264	23569	Java	Will\u00A0Stevens\u00A0	1	http://cloudstack.apache.org	281
Apache CloudStack	1540264	23569	Java	youribonnaffe	1	http://cloudstack.apache.org	281
Apache CloudStack	1540264	23569	Java	Ahmad E	2	http://cloudstack.apache.org	281
Apache CloudStack	1540264	23569	Java	Alex Ough	2	http://cloudstack.apache.org	281
Apache CloudStack	1540264	23569	Java	Brenn Oosterbaan	2	http://cloudstack.apache.org	281
Apache CloudStack	1540264	23569	Java	butanet	2	http://cloudstack.apache.org	281
Apache CloudStack	1540264	23569	Java	Chirag Jog	2	http://cloudstack.apache.org	281
Apache CloudStack	1540264	23569	Java	David Noland	2	http://cloudstack.apache.org	281
Apache CloudStack	1540264	23569	Java	Dennis Lawler	2	http://cloudstack.apache.org	281
Apache CloudStack	1540264	23569	Java	Doug Clark	2	http://cloudstack.apache.org	281
Apache CloudStack	1540264	23569	Java	Funs Kessen	2	http://cloudstack.apache.org	281
Apache CloudStack	1540264	23569	Java	Geoff Higginbottom	2	http://cloudstack.apache.org	281
Apache CloudStack	1540264	23569	Java	Hongtu Zang	2	http://cloudstack.apache.org	281
Apache CloudStack	1540264	23569	Java	Jayapal Reddy	2	http://cloudstack.apache.org	281
Apache CloudStack	1540264	23569	Java	JijunLiu	2	http://cloudstack.apache.org	281
Apache CloudStack	1540264	23569	Java	Joe Mills	2	http://cloudstack.apache.org	281
Apache CloudStack	1540264	23569	Java	Kanzhe Jiang	2	http://cloudstack.apache.org	281
Apache CloudStack	1540264	23569	Java	kelven	2	http://cloudstack.apache.org	281
Apache CloudStack	1540264	23569	Java	Logan McNaughton	2	http://cloudstack.apache.org	281
Apache CloudStack	1540264	23569	Java	marcus	2	http://cloudstack.apache.org	281
Apache CloudStack	1540264	23569	Java	Marty Sweet	2	http://cloudstack.apache.org	281
Apache CloudStack	1540264	23569	Java	Meghna Kale	2	http://cloudstack.apache.org	281
Apache CloudStack	1540264	23569	Java	Meng Han	2	http://cloudstack.apache.org	281
Apache CloudStack	1540264	23569	Java	nitin	2	http://cloudstack.apache.org	281
Apache CloudStack	1540264	23569	Java	pranav	2	http://cloudstack.apache.org	281
Apache CloudStack	1540264	23569	Java	Ricardo P. Katz	2	http://cloudstack.apache.org	281
Apache CloudStack	1540264	23569	Java	Robert Schweikert	2	http://cloudstack.apache.org	281
Apache CloudStack	1540264	23569	Java	Ryan Dietrich	2	http://cloudstack.apache.org	281
Apache CloudStack	1540264	23569	Java	sailajam	2	http://cloudstack.apache.org	281
Apache CloudStack	1540264	23569	Java	santhoshe	2	http://cloudstack.apache.org	281
Apache CloudStack	1540264	23569	Java	Satoshi Kobayashi	2	http://cloudstack.apache.org	281
Apache CloudStack	1540264	23569	Java	Saurav Lahiri	2	http://cloudstack.apache.org	281
Apache CloudStack	1540264	23569	Java	Simon Waterhouse	2	http://cloudstack.apache.org	281
Apache CloudStack	1540264	23569	Java	suresh sadhu	2	http://cloudstack.apache.org	281
Apache CloudStack	1540264	23569	Java	Thomas O*Dowd	2	http://cloudstack.apache.org	281
Apache CloudStack	1540264	23569	Java	Venkata Swamybabu Budumuru	2	http://cloudstack.apache.org	281
Apache CloudStack	1540264	23569	Java	vetrivelc	2	http://cloudstack.apache.org	281
Apache CloudStack	1540264	23569	Java	Vijay	2	http://cloudstack.apache.org	281
Apache CloudStack	1540264	23569	Java	vinayvarmav	2	http://cloudstack.apache.org	281
Apache CloudStack	1540264	23569	Java	Will Stevens	2	http://cloudstack.apache.org	281
Apache CloudStack	1540264	23569	Java	Yichi Lu	2	http://cloudstack.apache.org	281
Apache CloudStack	1540264	23569	Java	ahmad	3	http://cloudstack.apache.org	281
Apache CloudStack	1540264	23569	Java	Alena	3	http://cloudstack.apache.org	281
Apache CloudStack	1540264	23569	Java	Ashutosh Kelkar	3	http://cloudstack.apache.org	281
Apache CloudStack	1540264	23569	Java	ashutoshkelkar	3	http://cloudstack.apache.org	281
Apache CloudStack	1540264	23569	Java	Brian Spindler	3	http://cloudstack.apache.org	281
Apache CloudStack	1540264	23569	Java	hongtu_zang	3	http://cloudstack.apache.org	281
Apache CloudStack	1540264	23569	Java	Joris van Lieshout	3	http://cloudstack.apache.org	281
Apache CloudStack	1540264	23569	Java	Konstantina Chremmou	3	http://cloudstack.apache.org	281
Apache CloudStack	1540264	23569	Java	miguelaferreira	3	http://cloudstack.apache.org	281
Apache CloudStack	1540264	23569	Java	Niels de Vos	3	http://cloudstack.apache.org	281
Apache CloudStack	1540264	23569	Java	Nikita	3	http://cloudstack.apache.org	281
Apache CloudStack	1540264	23569	Java	Parth Jagirdar	3	http://cloudstack.apache.org	281
Apache CloudStack	1540264	23569	Java	Rayees Namathponnan	3	http://cloudstack.apache.org	281
Apache CloudStack	1540264	23569	Java	Srikanteswararao Talluri	3	http://cloudstack.apache.org	281
Apache CloudStack	1540264	23569	Java	Syed Ahmed	3	http://cloudstack.apache.org	281
Apache CloudStack	1540264	23569	Java	Vijay Vekatachalam	3	http://cloudstack.apache.org	281
Apache CloudStack	1540264	23569	Java	Deepak Garg	4	http://cloudstack.apache.org	281
Apache CloudStack	1540264	23569	Java	Pascal Borreli	4	http://cloudstack.apache.org	281
Apache CloudStack	1540264	23569	Java	Phong Nguyen	4	http://cloudstack.apache.org	281
Apache CloudStack	1540264	23569	Java	Pradeep	4	http://cloudstack.apache.org	281
Apache CloudStack	1540264	23569	Java	Radhika Puthiyetath	4	http://cloudstack.apache.org	281
Apache CloudStack	1540264	23569	Java	santhosh	4	http://cloudstack.apache.org	281
Apache CloudStack	1540264	23569	Java	Shiva Teja	4	http://cloudstack.apache.org	281
Apache CloudStack	1540264	23569	Java	Ian Southam	5	http://cloudstack.apache.org	281
Apache CloudStack	1540264	23569	Java	ilya musayev	5	http://cloudstack.apache.org	281
Apache CloudStack	1540264	23569	Java	sateesh	5	http://cloudstack.apache.org	281
Apache CloudStack	1540264	23569	Java	Toshiaki Hatano	5	http://cloudstack.apache.org	281
Apache CloudStack	1540264	23569	Java	yichi.lu	5	http://cloudstack.apache.org	281
Apache CloudStack	1540264	23569	Java	Deepti Dohare	6	http://cloudstack.apache.org	281
Apache CloudStack	1540264	23569	Java	Jayapal Uradi	6	http://cloudstack.apache.org	281
Apache CloudStack	1540264	23569	Java	Rene Diepstraten	6	http://cloudstack.apache.org	281
Apache CloudStack	1540264	23569	Java	Sachchidanand Vaidya	6	http://cloudstack.apache.org	281
Apache CloudStack	1540264	23569	Java	sbalineni	6	http://cloudstack.apache.org	281
Apache CloudStack	1540264	23569	Java	venkataswamybabu budumuru	6	http://cloudstack.apache.org	281
Apache CloudStack	1540264	23569	Java	Vijay venkatachalam	6	http://cloudstack.apache.org	281
Apache CloudStack	1540264	23569	Java	Vijay Venkatachalam	6	http://cloudstack.apache.org	281
Apache CloudStack	1540264	23569	Java	wilderrodrigues	6	http://cloudstack.apache.org	281
Apache CloudStack	1540264	23569	Java	Alex Hitchins	7	http://cloudstack.apache.org	281
Apache CloudStack	1540264	23569	Java	edison su	7	http://cloudstack.apache.org	281
Apache CloudStack	1540264	23569	Java	Ewan Mellor	7	http://cloudstack.apache.org	281
Apache CloudStack	1540264	23569	Java	Gabor Apati-Nagy	7	http://cloudstack.apache.org	281
Apache CloudStack	1540264	23569	Java	Mihaela Stoica	7	http://cloudstack.apache.org	281
Apache CloudStack	1540264	23569	Java	wrodrigues	7	http://cloudstack.apache.org	281
Apache CloudStack	1540264	23569	Java	Dave Brosius	8	http://cloudstack.apache.org	281
Apache CloudStack	1540264	23569	Java	Osamu	8	http://cloudstack.apache.org	281
Apache CloudStack	1540264	23569	Java	Pradeep Soundararajan	8	http://cloudstack.apache.org	281
Apache CloudStack	1540264	23569	Java	Amogh Vasekar	9	http://cloudstack.apache.org	281
Apache CloudStack	1540264	23569	Java	Dave Cahill	9	http://cloudstack.apache.org	281
Apache CloudStack	1540264	23569	Java	ahuang	10	http://cloudstack.apache.org	281
Apache CloudStack	1540264	23569	Java	Donal Lafferty	10	http://cloudstack.apache.org	281
Apache CloudStack	1540264	23569	Java	Noa Resare	10	http://cloudstack.apache.org	281
Apache CloudStack	1540264	23569	Java	Ragnar B. Johannsson	10	http://cloudstack.apache.org	281
Apache CloudStack	1540264	23569	Java	Talluri	10	http://cloudstack.apache.org	281
Apache CloudStack	1540264	23569	Java	Antonio Fornie	11	http://cloudstack.apache.org	281
Apache CloudStack	1540264	23569	Java	David Grizzanti	12	http://cloudstack.apache.org	281
Apache CloudStack	1540264	23569	Java	ynojima	12	http://cloudstack.apache.org	281
Apache CloudStack	1540264	23569	Java	Hiroaki Kawai	13	http://cloudstack.apache.org	281
Apache CloudStack	1540264	23569	Java	sanjeevneelarapu	13	http://cloudstack.apache.org	281
Apache CloudStack	1540264	23569	Java	James Martin	14	http://cloudstack.apache.org	281
Apache CloudStack	1540264	23569	Java	chip.ch...@gmail.com	16	http://cloudstack.apache.org	281
Apache CloudStack	1540264	23569	Java	Edison.Su	16	http://cloudstack.apache.org	281
Apache CloudStack	1540264	23569	Java	rayeesn	17	http://cloudstack.apache.org	281
Apache CloudStack	1540264	23569	Java	Sowmya Krishnan	17	http://cloudstack.apache.org	281
Apache CloudStack	1540264	23569	Java	Isaac Chiang	18	http://cloudstack.apache.org	281
Apache CloudStack	1540264	23569	Java	John Burwell	18	http://cloudstack.apache.org	281
Apache CloudStack	1540264	23569	Java	Sam Robertson	18	http://cloudstack.apache.org	281
Apache CloudStack	1540264	23569	Java	Gavin Lee	21	http://cloudstack.apache.org	281
Apache CloudStack	1540264	23569	Java	olgasmola	21	http://cloudstack.apache.org	281
Apache CloudStack	1540264	23569	Java	Damodar Reddy	22	http://cloudstack.apache.org	281
Apache CloudStack	1540264	23569	Java	Fang Wang	22	http://cloudstack.apache.org	281
Apache CloudStack	1540264	23569	Java	Frank Zhang	22	http://cloudstack.apache.org	281
Apache CloudStack	1540264	23569	Java	John Kinsella	22	http://cloudstack.apache.org	281
Apache CloudStack	1540264	23569	Java	Ian Duffy	24	http://cloudstack.apache.org	281
Apache CloudStack	1540264	23569	Java	Chris Suich	26	http://cloudstack.apache.org	281
Apache CloudStack	1540264	23569	Java	Hiroaki KAWAI	27	http://cloudstack.apache.org	281
Apache CloudStack	1540264	23569	Java	Rajani Karuturi	27	http://cloudstack.apache.org	281
Apache CloudStack	1540264	23569	Java	Ashutosh K	28	http://cloudstack.apache.org	281
Apache CloudStack	1540264	23569	Java	tuna	28	http://cloudstack.apache.org	281
Apache CloudStack	1540264	23569	Java	Saksham Srivastava	30	http://cloudstack.apache.org	281
Apache CloudStack	1540264	23569	Java	olivier lamy	31	http://cloudstack.apache.org	281
Apache CloudStack	1540264	23569	Java	Kevin Kluge	33	http://cloudstack.apache.org	281
Apache CloudStack	1540264	23569	Java	Salvatore Orlando	34	http://cloudstack.apache.org	281
Apache CloudStack	1540264	23569	Java	Milamber	36	http://cloudstack.apache.org	281
Apache CloudStack	1540264	23569	Java	jessica	39	http://cloudstack.apache.org	281
Apache CloudStack	1540264	23569	Java	Anshul Gangwar	40	http://cloudstack.apache.org	281
Apache CloudStack	1540264	23569	Java	abhi	42	http://cloudstack.apache.org	281
Apache CloudStack	1540264	23569	Java	Jessica	43	http://cloudstack.apache.org	281
Apache CloudStack	1540264	23569	Java	keshav	50	http://cloudstack.apache.org	281
Apache CloudStack	1540264	23569	Java	Santhosh Edukulla	57	http://cloudstack.apache.org	281
Apache CloudStack	1540264	23569	Java	Sebastien Goasguen	59	http://cloudstack.apache.org	281
Apache CloudStack	1540264	23569	Java	Murali reddy	60	http://cloudstack.apache.org	281
Apache CloudStack	1540264	23569	Java	Mike Tutkowski	61	http://cloudstack.apache.org	281
Apache CloudStack	1540264	23569	Java	SrikanteswaraRao Talluri	64	http://cloudstack.apache.org	281
Apache CloudStack	1540264	23569	Java	Bharat Kumar	65	http://cloudstack.apache.org	281
Apache CloudStack	1540264	23569	Java	Rajesh Battala	71	http://cloudstack.apache.org	281
Apache CloudStack	1540264	23569	Java	Harikrishna Patnala	77	http://cloudstack.apache.org	281
Apache CloudStack	1540264	23569	Java	Vijayendra Bhamidipati	78	http://cloudstack.apache.org	281
Apache CloudStack	1540264	23569	Java	Girish Shilamkar	81	http://cloudstack.apache.org	281
Apache CloudStack	1540264	23569	Java	Darren Shepherd	82	http://cloudstack.apache.org	281
Apache CloudStack	1540264	23569	Java	Naredula Janardhana Reddy	82	http://cloudstack.apache.org	281
Apache CloudStack	1540264	23569	Java	Koushik Das	83	http://cloudstack.apache.org	281
Apache CloudStack	1540264	23569	Java	radhikap	85	http://cloudstack.apache.org	281
Apache CloudStack	1540264	23569	Java	Gaurav Aradhye	90	http://cloudstack.apache.org	281
Apache CloudStack	1540264	23569	Java	Nitin	94	http://cloudstack.apache.org	281
Apache CloudStack	1540264	23569	Java	Devdeep Singh	98	http://cloudstack.apache.org	281
Apache CloudStack	1540264	23569	Java	Joe Brockmeier	99	http://cloudstack.apache.org	281
Apache CloudStack	1540264	23569	Java	Manuel Amador (Rudd-O)	99	http://cloudstack.apache.org	281
Apache CloudStack	1540264	23569	Java	Mice Xia	105	http://cloudstack.apache.org	281
Apache CloudStack	1540264	23569	Java	Jayapal	107	http://cloudstack.apache.org	281
Apache CloudStack	1540264	23569	Java	Laszlo Hornyak	107	http://cloudstack.apache.org	281
Apache CloudStack	1540264	23569	Java	Radhika PC	111	http://cloudstack.apache.org	281
Apache CloudStack	1540264	23569	Java	Sateesh Chodapuneedi	112	http://cloudstack.apache.org	281
Apache CloudStack	1540264	23569	Java	Sanjay Tripathi	116	http://cloudstack.apache.org	281
Apache CloudStack	1540264	23569	Java	Daan Hoogland	118	http://cloudstack.apache.org	281
Apache CloudStack	1540264	23569	Java	Jessica Tomechak	136	http://cloudstack.apache.org	281
Apache CloudStack	1540264	23569	Java	Wei Zhou	137	http://cloudstack.apache.org	281
Apache CloudStack	1540264	23569	Java	nit	145	http://cloudstack.apache.org	281
Apache CloudStack	1540264	23569	Java	Anthony Xu	147	http://cloudstack.apache.org	281
Apache CloudStack	1540264	23569	Java	prachi	161	http://cloudstack.apache.org	281
Apache CloudStack	1540264	23569	Java	Likitha Shetty	163	http://cloudstack.apache.org	281
Apache CloudStack	1540264	23569	Java	Frank	178	http://cloudstack.apache.org	281
Apache CloudStack	1540264	23569	Java	Marcus Sorensen	184	http://cloudstack.apache.org	281
Apache CloudStack	1540264	23569	Java	edison	190	http://cloudstack.apache.org	281
Apache CloudStack	1540264	23569	Java	Kris McQueen	204	http://cloudstack.apache.org	281
Apache CloudStack	1540264	23569	Java	Nitin Mehta	213	http://cloudstack.apache.org	281
Apache CloudStack	1540264	23569	Java	Abhinandan Prateek	216	http://cloudstack.apache.org	281
Apache CloudStack	1540264	23569	Java	ke4qqq	246	http://cloudstack.apache.org	281
Apache CloudStack	1540264	23569	Java	Murali Reddy	247	http://cloudstack.apache.org	281
Apache CloudStack	1540264	23569	Java	Chip Childers	270	http://cloudstack.apache.org	281
Apache CloudStack	1540264	23569	Java	bfederle	272	http://cloudstack.apache.org	281
Apache CloudStack	1540264	23569	Java	Prachi Damle	277	http://cloudstack.apache.org	281
Apache CloudStack	1540264	23569	Java	NIKITA	278	http://cloudstack.apache.org	281
Apache CloudStack	1540264	23569	Java	will	290	http://cloudstack.apache.org	281
Apache CloudStack	1540264	23569	Java	Wido den Hollander	302	http://cloudstack.apache.org	281
Apache CloudStack	1540264	23569	Java	Pranav Saxena	352	http://cloudstack.apache.org	281
Apache CloudStack	1540264	23569	Java	Chiradeep Vittal	415	http://cloudstack.apache.org	281
Apache CloudStack	1540264	23569	Java	frank	422	http://cloudstack.apache.org	281
Apache CloudStack	1540264	23569	Java	Hugo Trippaers	442	http://cloudstack.apache.org	281
Apache CloudStack	1540264	23569	Java	kishan	480	http://cloudstack.apache.org	281
Apache CloudStack	1540264	23569	Java	abhishek	517	http://cloudstack.apache.org	281
Apache CloudStack	1540264	23569	Java	Prasanna Santhanam	617	http://cloudstack.apache.org	281
Apache CloudStack	1540264	23569	Java	Rohit Yadav	635	http://cloudstack.apache.org	281
Apache CloudStack	1540264	23569	Java	Min Chen	711	http://cloudstack.apache.org	281
Apache CloudStack	1540264	23569	Java	Sheng Yang	724	http://cloudstack.apache.org	281
Apache CloudStack	1540264	23569	Java	anthony	770	http://cloudstack.apache.org	281
Apache CloudStack	1540264	23569	Java	Kelven Yang	847	http://cloudstack.apache.org	281
Apache CloudStack	1540264	23569	Java	Alex Huang	861	http://cloudstack.apache.org	281
Apache CloudStack	1540264	23569	Java	Alena Prokharchyk	967	http://cloudstack.apache.org	281
Apache CloudStack	1540264	23569	Java	Edison Su	974	http://cloudstack.apache.org	281
Apache CloudStack	1540264	23569	Java	alena	1147	http://cloudstack.apache.org	281
Apache CloudStack	1540264	23569	Java	Brian Federle	1296	http://cloudstack.apache.org	281
Apache CloudStack	1540264	23569	Java	Jessica Wang	3508	http://cloudstack.apache.org	281
Apache Cocoon	1451780	24239	Java	ahochsteger	1	http://cocoon.apache.org/	85
Apache Cocoon	1451780	24239	Java	bmclaugh	1	http://cocoon.apache.org/	85
Apache Cocoon	1451780	24239	Java	brian	1	http://cocoon.apache.org/	85
Apache Cocoon	1451780	24239	Java	dlegg	1	http://cocoon.apache.org/	85
Apache Cocoon	1451780	24239	Java	lmorandini	1	http://cocoon.apache.org/	85
Apache Cocoon	1451780	24239	Java	prussell	1	http://cocoon.apache.org/	85
Apache Cocoon	1451780	24239	Java	twl	1	http://cocoon.apache.org/	85
Apache Cocoon	1451780	24239	Java	zvia	1	http://cocoon.apache.org/	85
Apache Cocoon	1451780	24239	Java	arje	2	http://cocoon.apache.org/	85
Apache Cocoon	1451780	24239	Java	josias	2	http://cocoon.apache.org/	85
Apache Cocoon	1451780	24239	Java	mlangham	2	http://cocoon.apache.org/	85
Apache Cocoon	1451780	24239	Java	morrijr	2	http://cocoon.apache.org/	85
Apache Cocoon	1451780	24239	Java	solprovider	2	http://cocoon.apache.org/	85
Apache Cocoon	1451780	24239	Java	dirkx	3	http://cocoon.apache.org/	85
Apache Cocoon	1451780	24239	Java	gregor	3	http://cocoon.apache.org/	85
Apache Cocoon	1451780	24239	Java	ard	4	http://cocoon.apache.org/	85
Apache Cocoon	1451780	24239	Java	shannon	6	http://cocoon.apache.org/	85
Apache Cocoon	1451780	24239	Java	dims	7	http://cocoon.apache.org/	85
Apache Cocoon	1451780	24239	Java	michaelm	7	http://cocoon.apache.org/	85
Apache Cocoon	1451780	24239	Java	proyal	8	http://cocoon.apache.org/	85
Apache Cocoon	1451780	24239	Java	javier	12	http://cocoon.apache.org/	85
Apache Cocoon	1451780	24239	Java	robbypelssers	12	http://cocoon.apache.org/	85
Apache Cocoon	1451780	24239	Java	rubys	12	http://cocoon.apache.org/	85
Apache Cocoon	1451780	24239	Java	jreijn	13	http://cocoon.apache.org/	85
Apache Cocoon	1451780	24239	Java	crafterm	14	http://cocoon.apache.org/	85
Apache Cocoon	1451780	24239	Java	michi	14	http://cocoon.apache.org/	85
Apache Cocoon	1451780	24239	Java	butlermh	16	http://cocoon.apache.org/	85
Apache Cocoon	1451780	24239	Java	mpfingsthorn	16	http://cocoon.apache.org/	85
Apache Cocoon	1451780	24239	Java	kpiroumian	18	http://cocoon.apache.org/	85
Apache Cocoon	1451780	24239	Java	jjohnston	19	http://cocoon.apache.org/	85
Apache Cocoon	1451780	24239	Java	ltrieloff	20	http://cocoon.apache.org/	85
Apache Cocoon	1451780	24239	Java	jasha	23	http://cocoon.apache.org/	85
Apache Cocoon	1451780	24239	Java	roku	23	http://cocoon.apache.org/	85
Apache Cocoon	1451780	24239	Java	rgardler	26	http://cocoon.apache.org/	85
Apache Cocoon	1451780	24239	Java	cdamioli	28	http://cocoon.apache.org/	85
Apache Cocoon	1451780	24239	Java	huber	34	http://cocoon.apache.org/	85
Apache Cocoon	1451780	24239	Java	asavory	37	http://cocoon.apache.org/	85
Apache Cocoon	1451780	24239	Java	andreas	42	http://cocoon.apache.org/	85
Apache Cocoon	1451780	24239	Java	nicolaken	42	http://cocoon.apache.org/	85
Apache Cocoon	1451780	24239	Java	stevendolg	43	http://cocoon.apache.org/	85
Apache Cocoon	1451780	24239	Java	simoneg	53	http://cocoon.apache.org/	85
Apache Cocoon	1451780	24239	Java	stevenn	58	http://cocoon.apache.org/	85
Apache Cocoon	1451780	24239	Java	bloritsch	63	http://cocoon.apache.org/	85
Apache Cocoon	1451780	24239	Java	gianugo	79	http://cocoon.apache.org/	85
Apache Cocoon	1451780	24239	Java	hepabolu	84	http://cocoon.apache.org/	85
Apache Cocoon	1451780	24239	Java	tony	85	http://cocoon.apache.org/	85
Apache Cocoon	1451780	24239	Java	rgoers	95	http://cocoon.apache.org/	85
Apache Cocoon	1451780	24239	Java	gcasper	97	http://cocoon.apache.org/	85
Apache Cocoon	1451780	24239	Java	jeremy	97	http://cocoon.apache.org/	85
Apache Cocoon	1451780	24239	Java	ricardo	97	http://cocoon.apache.org/	85
Apache Cocoon	1451780	24239	Java	tcurdt	101	http://cocoon.apache.org/	85
Apache Cocoon	1451780	24239	Java	jbq	126	http://cocoon.apache.org/	85
Apache Cocoon	1451780	24239	Java	ghoward	131	http://cocoon.apache.org/	85
Apache Cocoon	1451780	24239	Java	thorsten	139	http://cocoon.apache.org/	85
Apache Cocoon	1451780	24239	Java	jefft	150	http://cocoon.apache.org/	85
Apache Cocoon	1451780	24239	Java	haul	170	http://cocoon.apache.org/	85
Apache Cocoon	1451780	24239	Java	anathaniel	184	http://cocoon.apache.org/	85
Apache Cocoon	1451780	24239	Java	tim	199	http://cocoon.apache.org/	85
Apache Cocoon	1451780	24239	Java	pier	205	http://cocoon.apache.org/	85
Apache Cocoon	1451780	24239	Java	mpo	211	http://cocoon.apache.org/	85
Apache Cocoon	1451780	24239	Java	ugo	211	http://cocoon.apache.org/	85
Apache Cocoon	1451780	24239	Java	felixk	212	http://cocoon.apache.org/	85
Apache Cocoon	1451780	24239	Java	simonetripodi	218	http://cocoon.apache.org/	85
Apache Cocoon	1451780	24239	Java	balld	226	http://cocoon.apache.org/	85
Apache Cocoon	1451780	24239	Java	upayavira	231	http://cocoon.apache.org/	85
Apache Cocoon	1451780	24239	Java	lgawron	249	http://cocoon.apache.org/	85
Apache Cocoon	1451780	24239	Java	jheymans	305	http://cocoon.apache.org/	85
Apache Cocoon	1451780	24239	Java	giacomo	357	http://cocoon.apache.org/	85
Apache Cocoon	1451780	24239	Java	greenrd	366	http://cocoon.apache.org/	85
Apache Cocoon	1451780	24239	Java	ilgrosso	385	http://cocoon.apache.org/	85
Apache Cocoon	1451780	24239	Java	bdelacretaz	401	http://cocoon.apache.org/	85
Apache Cocoon	1451780	24239	Java	gkossakowski	464	http://cocoon.apache.org/	85
Apache Cocoon	1451780	24239	Java	stephan	467	http://cocoon.apache.org/	85
Apache Cocoon	1451780	24239	Java	danielf	492	http://cocoon.apache.org/	85
Apache Cocoon	1451780	24239	Java	coliver	538	http://cocoon.apache.org/	85
Apache Cocoon	1451780	24239	Java	sylvain	619	http://cocoon.apache.org/	85
Apache Cocoon	1451780	24239	Java	unico	723	http://cocoon.apache.org/	85
Apache Cocoon	1451780	24239	Java	stefano	792	http://cocoon.apache.org/	85
Apache Cocoon	1451780	24239	Java	crossley	872	http://cocoon.apache.org/	85
Apache Cocoon	1451780	24239	Java	bruno	878	http://cocoon.apache.org/	85
Apache Cocoon	1451780	24239	Java	antonio	1359	http://cocoon.apache.org/	85
Apache Cocoon	1451780	24239	Java	joerg	1518	http://cocoon.apache.org/	85
Apache Cocoon	1451780	24239	Java	vgritsenko	2089	http://cocoon.apache.org/	85
Apache Cocoon	1451780	24239	Java	reinhard	3148	http://cocoon.apache.org/	85
Apache Cocoon	1451780	24239	Java	cziegeler	4171	http://cocoon.apache.org/	85
Apache Cocoon 1.X	33971	1200	Java	bmclaugh	1	http://cocoon.apache.org/1.x/	20
Apache Cocoon 1.X	33971	1200	Java	brian	1	http://cocoon.apache.org/1.x/	20
Apache Cocoon 1.X	33971	1200	Java	pier	1	http://cocoon.apache.org/1.x/	20
Apache Cocoon 1.X	33971	1200	Java	prussell	1	http://cocoon.apache.org/1.x/	20
Apache Cocoon 1.X	33971	1200	Java	twl	1	http://cocoon.apache.org/1.x/	20
Apache Cocoon 1.X	33971	1200	Java	zvia	1	http://cocoon.apache.org/1.x/	20
Apache Cocoon 1.X	33971	1200	Java	cziegeler	2	http://cocoon.apache.org/1.x/	20
Apache Cocoon 1.X	33971	1200	Java	rubys	2	http://cocoon.apache.org/1.x/	20
Apache Cocoon 1.X	33971	1200	Java	dirkx	3	http://cocoon.apache.org/1.x/	20
Apache Cocoon 1.X	33971	1200	Java	jeremy	3	http://cocoon.apache.org/1.x/	20
Apache Cocoon 1.X	33971	1200	Java	joerg	4	http://cocoon.apache.org/1.x/	20
Apache Cocoon 1.X	33971	1200	Java	sylvain	6	http://cocoon.apache.org/1.x/	20
Apache Cocoon 1.X	33971	1200	Java	dims	7	http://cocoon.apache.org/1.x/	20
Apache Cocoon 1.X	33971	1200	Java	giacomo	7	http://cocoon.apache.org/1.x/	20
Apache Cocoon 1.X	33971	1200	Java	vgritsenko	12	http://cocoon.apache.org/1.x/	20
Apache Cocoon 1.X	33971	1200	Java	bloritsch	13	http://cocoon.apache.org/1.x/	20
Apache Cocoon 1.X	33971	1200	Java	ricardo	95	http://cocoon.apache.org/1.x/	20
Apache Cocoon 1.X	33971	1200	Java	balld	226	http://cocoon.apache.org/1.x/	20
Apache Cocoon 1.X	33971	1200	Java	greenrd	366	http://cocoon.apache.org/1.x/	20
Apache Cocoon 1.X	33971	1200	Java	stefano	448	http://cocoon.apache.org/1.x/	20
Apache Cocoon 2.1	491447	7648	Java	josias	1	http://svn.apache.org/repos/asf/cocoon/branches/BRANCH_2_1_X/	65
Apache Cocoon 2.1	491447	7648	Java	mlangham	1	http://svn.apache.org/repos/asf/cocoon/branches/BRANCH_2_1_X/	65
Apache Cocoon 2.1	491447	7648	Java	morrijr	1	http://svn.apache.org/repos/asf/cocoon/branches/BRANCH_2_1_X/	65
Apache Cocoon 2.1	491447	7648	Java	ricardo	1	http://svn.apache.org/repos/asf/cocoon/branches/BRANCH_2_1_X/	65
Apache Cocoon 2.1	491447	7648	Java	ard	2	http://svn.apache.org/repos/asf/cocoon/branches/BRANCH_2_1_X/	65
Apache Cocoon 2.1	491447	7648	Java	gregor	2	http://svn.apache.org/repos/asf/cocoon/branches/BRANCH_2_1_X/	65
Apache Cocoon 2.1	491447	7648	Java	jreijn	2	http://svn.apache.org/repos/asf/cocoon/branches/BRANCH_2_1_X/	65
Apache Cocoon 2.1	491447	7648	Java	solprovider	2	http://svn.apache.org/repos/asf/cocoon/branches/BRANCH_2_1_X/	65
Apache Cocoon 2.1	491447	7648	Java	michaelm	3	http://svn.apache.org/repos/asf/cocoon/branches/BRANCH_2_1_X/	65
Apache Cocoon 2.1	491447	7648	Java	shannon	3	http://svn.apache.org/repos/asf/cocoon/branches/BRANCH_2_1_X/	65
Apache Cocoon 2.1	491447	7648	Java	proyal	4	http://svn.apache.org/repos/asf/cocoon/branches/BRANCH_2_1_X/	65
Apache Cocoon 2.1	491447	7648	Java	jjohnston	5	http://svn.apache.org/repos/asf/cocoon/branches/BRANCH_2_1_X/	65
Apache Cocoon 2.1	491447	7648	Java	rubys	5	http://svn.apache.org/repos/asf/cocoon/branches/BRANCH_2_1_X/	65
Apache Cocoon 2.1	491447	7648	Java	thorsten	5	http://svn.apache.org/repos/asf/cocoon/branches/BRANCH_2_1_X/	65
Apache Cocoon 2.1	491447	7648	Java	crafterm	7	http://svn.apache.org/repos/asf/cocoon/branches/BRANCH_2_1_X/	65
Apache Cocoon 2.1	491447	7648	Java	butlermh	8	http://svn.apache.org/repos/asf/cocoon/branches/BRANCH_2_1_X/	65
Apache Cocoon 2.1	491447	7648	Java	danielf	8	http://svn.apache.org/repos/asf/cocoon/branches/BRANCH_2_1_X/	65
Apache Cocoon 2.1	491447	7648	Java	kpiroumian	9	http://svn.apache.org/repos/asf/cocoon/branches/BRANCH_2_1_X/	65
Apache Cocoon 2.1	491447	7648	Java	ilgrosso	10	http://svn.apache.org/repos/asf/cocoon/branches/BRANCH_2_1_X/	65
Apache Cocoon 2.1	491447	7648	Java	michi	10	http://svn.apache.org/repos/asf/cocoon/branches/BRANCH_2_1_X/	65
Apache Cocoon 2.1	491447	7648	Java	mpfingsthorn	10	http://svn.apache.org/repos/asf/cocoon/branches/BRANCH_2_1_X/	65
Apache Cocoon 2.1	491447	7648	Java	bloritsch	11	http://svn.apache.org/repos/asf/cocoon/branches/BRANCH_2_1_X/	65
Apache Cocoon 2.1	491447	7648	Java	jasha	11	http://svn.apache.org/repos/asf/cocoon/branches/BRANCH_2_1_X/	65
Apache Cocoon 2.1	491447	7648	Java	roku	11	http://svn.apache.org/repos/asf/cocoon/branches/BRANCH_2_1_X/	65
Apache Cocoon 2.1	491447	7648	Java	andreas	13	http://svn.apache.org/repos/asf/cocoon/branches/BRANCH_2_1_X/	65
Apache Cocoon 2.1	491447	7648	Java	gkossakowski	13	http://svn.apache.org/repos/asf/cocoon/branches/BRANCH_2_1_X/	65
Apache Cocoon 2.1	491447	7648	Java	huber	13	http://svn.apache.org/repos/asf/cocoon/branches/BRANCH_2_1_X/	65
Apache Cocoon 2.1	491447	7648	Java	nicolaken	15	http://svn.apache.org/repos/asf/cocoon/branches/BRANCH_2_1_X/	65
Apache Cocoon 2.1	491447	7648	Java	simoneg	15	http://svn.apache.org/repos/asf/cocoon/branches/BRANCH_2_1_X/	65
Apache Cocoon 2.1	491447	7648	Java	jheymans	17	http://svn.apache.org/repos/asf/cocoon/branches/BRANCH_2_1_X/	65
Apache Cocoon 2.1	491447	7648	Java	asavory	18	http://svn.apache.org/repos/asf/cocoon/branches/BRANCH_2_1_X/	65
Apache Cocoon 2.1	491447	7648	Java	cdamioli	27	http://svn.apache.org/repos/asf/cocoon/branches/BRANCH_2_1_X/	65
Apache Cocoon 2.1	491447	7648	Java	stevenn	29	http://svn.apache.org/repos/asf/cocoon/branches/BRANCH_2_1_X/	65
Apache Cocoon 2.1	491447	7648	Java	lgawron	31	http://svn.apache.org/repos/asf/cocoon/branches/BRANCH_2_1_X/	65
Apache Cocoon 2.1	491447	7648	Java	tony	35	http://svn.apache.org/repos/asf/cocoon/branches/BRANCH_2_1_X/	65
Apache Cocoon 2.1	491447	7648	Java	gianugo	39	http://svn.apache.org/repos/asf/cocoon/branches/BRANCH_2_1_X/	65
Apache Cocoon 2.1	491447	7648	Java	tcurdt	39	http://svn.apache.org/repos/asf/cocoon/branches/BRANCH_2_1_X/	65
Apache Cocoon 2.1	491447	7648	Java	jeremy	43	http://svn.apache.org/repos/asf/cocoon/branches/BRANCH_2_1_X/	65
Apache Cocoon 2.1	491447	7648	Java	hepabolu	45	http://svn.apache.org/repos/asf/cocoon/branches/BRANCH_2_1_X/	65
Apache Cocoon 2.1	491447	7648	Java	gcasper	46	http://svn.apache.org/repos/asf/cocoon/branches/BRANCH_2_1_X/	65
Apache Cocoon 2.1	491447	7648	Java	anathaniel	52	http://svn.apache.org/repos/asf/cocoon/branches/BRANCH_2_1_X/	65
Apache Cocoon 2.1	491447	7648	Java	tim	52	http://svn.apache.org/repos/asf/cocoon/branches/BRANCH_2_1_X/	65
Apache Cocoon 2.1	491447	7648	Java	rgoers	55	http://svn.apache.org/repos/asf/cocoon/branches/BRANCH_2_1_X/	65
Apache Cocoon 2.1	491447	7648	Java	ghoward	66	http://svn.apache.org/repos/asf/cocoon/branches/BRANCH_2_1_X/	65
Apache Cocoon 2.1	491447	7648	Java	jbq	73	http://svn.apache.org/repos/asf/cocoon/branches/BRANCH_2_1_X/	65
Apache Cocoon 2.1	491447	7648	Java	jefft	75	http://svn.apache.org/repos/asf/cocoon/branches/BRANCH_2_1_X/	65
Apache Cocoon 2.1	491447	7648	Java	haul	85	http://svn.apache.org/repos/asf/cocoon/branches/BRANCH_2_1_X/	65
Apache Cocoon 2.1	491447	7648	Java	giacomo	87	http://svn.apache.org/repos/asf/cocoon/branches/BRANCH_2_1_X/	65
Apache Cocoon 2.1	491447	7648	Java	pier	93	http://svn.apache.org/repos/asf/cocoon/branches/BRANCH_2_1_X/	65
Apache Cocoon 2.1	491447	7648	Java	mpo	103	http://svn.apache.org/repos/asf/cocoon/branches/BRANCH_2_1_X/	65
Apache Cocoon 2.1	491447	7648	Java	upayavira	103	http://svn.apache.org/repos/asf/cocoon/branches/BRANCH_2_1_X/	65
Apache Cocoon 2.1	491447	7648	Java	ugo	106	http://svn.apache.org/repos/asf/cocoon/branches/BRANCH_2_1_X/	65
Apache Cocoon 2.1	491447	7648	Java	reinhard	118	http://svn.apache.org/repos/asf/cocoon/branches/BRANCH_2_1_X/	65
Apache Cocoon 2.1	491447	7648	Java	stefano	149	http://svn.apache.org/repos/asf/cocoon/branches/BRANCH_2_1_X/	65
Apache Cocoon 2.1	491447	7648	Java	bdelacretaz	175	http://svn.apache.org/repos/asf/cocoon/branches/BRANCH_2_1_X/	65
Apache Cocoon 2.1	491447	7648	Java	stephan	228	http://svn.apache.org/repos/asf/cocoon/branches/BRANCH_2_1_X/	65
Apache Cocoon 2.1	491447	7648	Java	coliver	269	http://svn.apache.org/repos/asf/cocoon/branches/BRANCH_2_1_X/	65
Apache Cocoon 2.1	491447	7648	Java	sylvain	319	http://svn.apache.org/repos/asf/cocoon/branches/BRANCH_2_1_X/	65
Apache Cocoon 2.1	491447	7648	Java	unico	364	http://svn.apache.org/repos/asf/cocoon/branches/BRANCH_2_1_X/	65
Apache Cocoon 2.1	491447	7648	Java	crossley	401	http://svn.apache.org/repos/asf/cocoon/branches/BRANCH_2_1_X/	65
Apache Cocoon 2.1	491447	7648	Java	bruno	413	http://svn.apache.org/repos/asf/cocoon/branches/BRANCH_2_1_X/	65
Apache Cocoon 2.1	491447	7648	Java	joerg	729	http://svn.apache.org/repos/asf/cocoon/branches/BRANCH_2_1_X/	65
Apache Cocoon 2.1	491447	7648	Java	antonio	761	http://svn.apache.org/repos/asf/cocoon/branches/BRANCH_2_1_X/	65
Apache Cocoon 2.1	491447	7648	Java	vgritsenko	812	http://svn.apache.org/repos/asf/cocoon/branches/BRANCH_2_1_X/	65
Apache Cocoon 2.1	491447	7648	Java	cziegeler	1388	http://svn.apache.org/repos/asf/cocoon/branches/BRANCH_2_1_X/	65
Apache Cocoon 2.2	356195	13168	Java	ahochsteger	1	http://cocoon.apache.org	72
Apache Cocoon 2.2	356195	13168	Java	cdamioli	1	http://cocoon.apache.org	72
Apache Cocoon 2.2	356195	13168	Java	dlegg	1	http://cocoon.apache.org	72
Apache Cocoon 2.2	356195	13168	Java	gregor	1	http://cocoon.apache.org	72
Apache Cocoon 2.2	356195	13168	Java	josias	1	http://cocoon.apache.org	72
Apache Cocoon 2.2	356195	13168	Java	lmorandini	1	http://cocoon.apache.org	72
Apache Cocoon 2.2	356195	13168	Java	mlangham	1	http://cocoon.apache.org	72
Apache Cocoon 2.2	356195	13168	Java	morrijr	1	http://cocoon.apache.org	72
Apache Cocoon 2.2	356195	13168	Java	ricardo	1	http://cocoon.apache.org	72
Apache Cocoon 2.2	356195	13168	Java	ard	2	http://cocoon.apache.org	72
Apache Cocoon 2.2	356195	13168	Java	arje	2	http://cocoon.apache.org	72
Apache Cocoon 2.2	356195	13168	Java	javier	3	http://cocoon.apache.org	72
Apache Cocoon 2.2	356195	13168	Java	michi	3	http://cocoon.apache.org	72
Apache Cocoon 2.2	356195	13168	Java	shannon	3	http://cocoon.apache.org	72
Apache Cocoon 2.2	356195	13168	Java	michaelm	4	http://cocoon.apache.org	72
Apache Cocoon 2.2	356195	13168	Java	proyal	4	http://cocoon.apache.org	72
Apache Cocoon 2.2	356195	13168	Java	rubys	5	http://cocoon.apache.org	72
Apache Cocoon 2.2	356195	13168	Java	mpfingsthorn	6	http://cocoon.apache.org	72
Apache Cocoon 2.2	356195	13168	Java	butlermh	7	http://cocoon.apache.org	72
Apache Cocoon 2.2	356195	13168	Java	crafterm	7	http://cocoon.apache.org	72
Apache Cocoon 2.2	356195	13168	Java	kpiroumian	9	http://cocoon.apache.org	72
Apache Cocoon 2.2	356195	13168	Java	roku	11	http://cocoon.apache.org	72
Apache Cocoon 2.2	356195	13168	Java	andreas	12	http://cocoon.apache.org	72
Apache Cocoon 2.2	356195	13168	Java	jasha	12	http://cocoon.apache.org	72
Apache Cocoon 2.2	356195	13168	Java	jreijn	12	http://cocoon.apache.org	72
Apache Cocoon 2.2	356195	13168	Java	jjohnston	14	http://cocoon.apache.org	72
Apache Cocoon 2.2	356195	13168	Java	asavory	18	http://cocoon.apache.org	72
Apache Cocoon 2.2	356195	13168	Java	simonetripodi	19	http://cocoon.apache.org	72
Apache Cocoon 2.2	356195	13168	Java	huber	21	http://cocoon.apache.org	72
Apache Cocoon 2.2	356195	13168	Java	ltrieloff	26	http://cocoon.apache.org	72
Apache Cocoon 2.2	356195	13168	Java	nicolaken	27	http://cocoon.apache.org	72
Apache Cocoon 2.2	356195	13168	Java	stevenn	29	http://cocoon.apache.org	72
Apache Cocoon 2.2	356195	13168	Java	bloritsch	30	http://cocoon.apache.org	72
Apache Cocoon 2.2	356195	13168	Java	thorsten	31	http://cocoon.apache.org	72
Apache Cocoon 2.2	356195	13168	Java	simoneg	35	http://cocoon.apache.org	72
Apache Cocoon 2.2	356195	13168	Java	hepabolu	36	http://cocoon.apache.org	72
Apache Cocoon 2.2	356195	13168	Java	pier	36	http://cocoon.apache.org	72
Apache Cocoon 2.2	356195	13168	Java	gianugo	40	http://cocoon.apache.org	72
Apache Cocoon 2.2	356195	13168	Java	rgoers	40	http://cocoon.apache.org	72
Apache Cocoon 2.2	356195	13168	Java	tony	50	http://cocoon.apache.org	72
Apache Cocoon 2.2	356195	13168	Java	gcasper	51	http://cocoon.apache.org	72
Apache Cocoon 2.2	356195	13168	Java	jeremy	51	http://cocoon.apache.org	72
Apache Cocoon 2.2	356195	13168	Java	jbq	53	http://cocoon.apache.org	72
Apache Cocoon 2.2	356195	13168	Java	ghoward	62	http://cocoon.apache.org	72
Apache Cocoon 2.2	356195	13168	Java	tcurdt	62	http://cocoon.apache.org	72
Apache Cocoon 2.2	356195	13168	Java	jefft	75	http://cocoon.apache.org	72
Apache Cocoon 2.2	356195	13168	Java	anathaniel	78	http://cocoon.apache.org	72
Apache Cocoon 2.2	356195	13168	Java	haul	85	http://cocoon.apache.org	72
Apache Cocoon 2.2	356195	13168	Java	ugo	87	http://cocoon.apache.org	72
Apache Cocoon 2.2	356195	13168	Java	ilgrosso	90	http://cocoon.apache.org	72
Apache Cocoon 2.2	356195	13168	Java	tim	99	http://cocoon.apache.org	72
Apache Cocoon 2.2	356195	13168	Java	mpo	108	http://cocoon.apache.org	72
Apache Cocoon 2.2	356195	13168	Java	upayavira	113	http://cocoon.apache.org	72
Apache Cocoon 2.2	356195	13168	Java	bdelacretaz	181	http://cocoon.apache.org	72
Apache Cocoon 2.2	356195	13168	Java	stefano	189	http://cocoon.apache.org	72
Apache Cocoon 2.2	356195	13168	Java	felixk	220	http://cocoon.apache.org	72
Apache Cocoon 2.2	356195	13168	Java	lgawron	221	http://cocoon.apache.org	72
Apache Cocoon 2.2	356195	13168	Java	jheymans	234	http://cocoon.apache.org	72
Apache Cocoon 2.2	356195	13168	Java	stephan	234	http://cocoon.apache.org	72
Apache Cocoon 2.2	356195	13168	Java	giacomo	252	http://cocoon.apache.org	72
Apache Cocoon 2.2	356195	13168	Java	coliver	267	http://cocoon.apache.org	72
Apache Cocoon 2.2	356195	13168	Java	sylvain	293	http://cocoon.apache.org	72
Apache Cocoon 2.2	356195	13168	Java	unico	356	http://cocoon.apache.org	72
Apache Cocoon 2.2	356195	13168	Java	gkossakowski	419	http://cocoon.apache.org	72
Apache Cocoon 2.2	356195	13168	Java	danielf	420	http://cocoon.apache.org	72
Apache Cocoon 2.2	356195	13168	Java	crossley	431	http://cocoon.apache.org	72
Apache Cocoon 2.2	356195	13168	Java	bruno	454	http://cocoon.apache.org	72
Apache Cocoon 2.2	356195	13168	Java	antonio	580	http://cocoon.apache.org	72
Apache Cocoon 2.2	356195	13168	Java	joerg	789	http://cocoon.apache.org	72
Apache Cocoon 2.2	356195	13168	Java	vgritsenko	1226	http://cocoon.apache.org	72
Apache Cocoon 2.2	356195	13168	Java	reinhard	2171	http://cocoon.apache.org	72
Apache Cocoon 2.2	356195	13168	Java	cziegeler	2654	http://cocoon.apache.org	72
Apache Cocoon 3	43923	1182	Java	vgritsenko	3	http://cocoon.apache.org/3.0/	12
Apache Cocoon 3	43923	1182	Java	gkossakowski	4	http://cocoon.apache.org/3.0/	12
Apache Cocoon 3	43923	1182	Java	andreas	9	http://cocoon.apache.org/3.0/	12
Apache Cocoon 3	43923	1182	Java	javier	9	http://cocoon.apache.org/3.0/	12
Apache Cocoon 3	43923	1182	Java	cziegeler	10	http://cocoon.apache.org/3.0/	12
Apache Cocoon 3	43923	1182	Java	robbypelssers	12	http://cocoon.apache.org/3.0/	12
Apache Cocoon 3	43923	1182	Java	stevendolg	43	http://cocoon.apache.org/3.0/	12
Apache Cocoon 3	43923	1182	Java	anathaniel	51	http://cocoon.apache.org/3.0/	12
Apache Cocoon 3	43923	1182	Java	thorsten	94	http://cocoon.apache.org/3.0/	12
Apache Cocoon 3	43923	1182	Java	ilgrosso	158	http://cocoon.apache.org/3.0/	12
Apache Cocoon 3	43923	1182	Java	simonetripodi	199	http://cocoon.apache.org/3.0/	12
Apache Cocoon 3	43923	1182	Java	reinhard	590	http://cocoon.apache.org/3.0/	12
Apache Commons BCEL	38626	637	Java	dlr	1	http://commons.apache.org/proper/commons-bcel/	17
Apache Commons BCEL	38626	637	Java	olamy	1	http://commons.apache.org/proper/commons-bcel/	17
Apache Commons BCEL	38626	637	Java	rubys	1	http://commons.apache.org/proper/commons-bcel/	17
Apache Commons BCEL	38626	637	Java	skitching	1	http://commons.apache.org/proper/commons-bcel/	17
Apache Commons BCEL	38626	637	Java	conor	3	http://commons.apache.org/proper/commons-bcel/	17
Apache Commons BCEL	38626	637	Java	ddp	3	http://commons.apache.org/proper/commons-bcel/	17
Apache Commons BCEL	38626	637	Java	britter	4	http://commons.apache.org/proper/commons-bcel/	17
Apache Commons BCEL	38626	637	Java	markt	13	http://commons.apache.org/proper/commons-bcel/	17
Apache Commons BCEL	38626	637	Java	ggregory	14	http://commons.apache.org/proper/commons-bcel/	17
Apache Commons BCEL	38626	637	Java	bayard	18	http://commons.apache.org/proper/commons-bcel/	17
Apache Commons BCEL	38626	637	Java	jvanzyl	23	http://commons.apache.org/proper/commons-bcel/	17
Apache Commons BCEL	38626	637	Java	ebourg	45	http://commons.apache.org/proper/commons-bcel/	17
Apache Commons BCEL	38626	637	Java	enver	49	http://commons.apache.org/proper/commons-bcel/	17
Apache Commons BCEL	38626	637	Java	sebb	75	http://commons.apache.org/proper/commons-bcel/	17
Apache Commons BCEL	38626	637	Java	tcurdt	81	http://commons.apache.org/proper/commons-bcel/	17
Apache Commons BCEL	38626	637	Java	mdahm	138	http://commons.apache.org/proper/commons-bcel/	17
Apache Commons BCEL	38626	637	Java	dbrosius	166	http://commons.apache.org/proper/commons-bcel/	17
Apache Commons BeanUtils	43125	509	Java	brentworden	1	http://commons.apache.org/beanutils/	14
Apache Commons BeanUtils	43125	509	Java	dennisl	1	http://commons.apache.org/beanutils/	14
Apache Commons BeanUtils	43125	509	Java	ebourg	1	http://commons.apache.org/beanutils/	14
Apache Commons BeanUtils	43125	509	Java	mbenson	1	http://commons.apache.org/beanutils/	14
Apache Commons BeanUtils	43125	509	Java	psteitz	1	http://commons.apache.org/beanutils/	14
Apache Commons BeanUtils	43125	509	Java	rahul	1	http://commons.apache.org/beanutils/	14
Apache Commons BeanUtils	43125	509	Java	ggregory	5	http://commons.apache.org/beanutils/	14
Apache Commons BeanUtils	43125	509	Java	olamy	6	http://commons.apache.org/beanutils/	14
Apache Commons BeanUtils	43125	509	Java	bayard	11	http://commons.apache.org/beanutils/	14
Apache Commons BeanUtils	43125	509	Java	sebb	36	http://commons.apache.org/beanutils/	14
Apache Commons BeanUtils	43125	509	Java	oheger	76	http://commons.apache.org/beanutils/	14
Apache Commons BeanUtils	43125	509	Java	simonetripodi	105	http://commons.apache.org/beanutils/	14
Apache Commons BeanUtils	43125	509	Java	niallp	131	http://commons.apache.org/beanutils/	14
Apache Commons BeanUtils	43125	509	Java	britter	133	http://commons.apache.org/beanutils/	14
Apache Commons Betwixt	30120	47	Java	dennisl	1	http://commons.apache.org/proper/commons-betwixt/	9
Apache Commons Betwixt	30120	47	Java	ggregory	1	http://commons.apache.org/proper/commons-betwixt/	9
Apache Commons Betwixt	30120	47	Java	mbenson	1	http://commons.apache.org/proper/commons-betwixt/	9
Apache Commons Betwixt	30120	47	Java	olamy	2	http://commons.apache.org/proper/commons-betwixt/	9
Apache Commons Betwixt	30120	47	Java	rahul	2	http://commons.apache.org/proper/commons-betwixt/	9
Apache Commons Betwixt	30120	47	Java	dbrosius	3	http://commons.apache.org/proper/commons-betwixt/	9
Apache Commons Betwixt	30120	47	Java	sebb	6	http://commons.apache.org/proper/commons-betwixt/	9
Apache Commons Betwixt	30120	47	Java	bayard	8	http://commons.apache.org/proper/commons-betwixt/	9
Apache Commons Betwixt	30120	47	Java	niallp	23	http://commons.apache.org/proper/commons-betwixt/	9
Apache Commons Chain	14052	439	Java	dennisl	1	http://commons.apache.org/chain/	13
Apache Commons Chain	14052	439	Java	psteitz	1	http://commons.apache.org/chain/	13
Apache Commons Chain	14052	439	Java	rahul	1	http://commons.apache.org/chain/	13
Apache Commons Chain	14052	439	Java	skitching	1	http://commons.apache.org/chain/	13
Apache Commons Chain	14052	439	Java	ggregory	2	http://commons.apache.org/chain/	13
Apache Commons Chain	14052	439	Java	mbenson	2	http://commons.apache.org/chain/	13
Apache Commons Chain	14052	439	Java	olamy	2	http://commons.apache.org/chain/	13
Apache Commons Chain	14052	439	Java	elijah	5	http://commons.apache.org/chain/	13
Apache Commons Chain	14052	439	Java	bayard	11	http://commons.apache.org/chain/	13
Apache Commons Chain	14052	439	Java	sebb	18	http://commons.apache.org/chain/	13
Apache Commons Chain	14052	439	Java	niallp	80	http://commons.apache.org/chain/	13
Apache Commons Chain	14052	439	Java	britter	93	http://commons.apache.org/chain/	13
Apache Commons Chain	14052	439	Java	simonetripodi	222	http://commons.apache.org/chain/	13
Apache Commons CLI	8659	638	Java	bodewig	1	http://commons.apache.org/cli/	27
Apache Commons CLI	8659	638	Java	joehni	1	http://commons.apache.org/cli/	27
Apache Commons CLI	8659	638	Java	rahul	1	http://commons.apache.org/cli/	27
Apache Commons CLI	8659	638	Java	rdonkin	1	http://commons.apache.org/cli/	27
Apache Commons CLI	8659	638	Java	scolebourne	1	http://commons.apache.org/cli/	27
Apache Commons CLI	8659	638	Java	sgoeschl	1	http://commons.apache.org/cli/	27
Apache Commons CLI	8659	638	Java	yoavs	1	http://commons.apache.org/cli/	27
Apache Commons CLI	8659	638	Java	dennisl	2	http://commons.apache.org/cli/	27
Apache Commons CLI	8659	638	Java	jvanzyl	2	http://commons.apache.org/cli/	27
Apache Commons CLI	8659	638	Java	dion	3	http://commons.apache.org/cli/	27
Apache Commons CLI	8659	638	Java	jstrachan	3	http://commons.apache.org/cli/	27
Apache Commons CLI	8659	638	Java	werken	3	http://commons.apache.org/cli/	27
Apache Commons CLI	8659	638	Java	dirkv	4	http://commons.apache.org/cli/	27
Apache Commons CLI	8659	638	Java	jim	4	http://commons.apache.org/cli/	27
Apache Commons CLI	8659	638	Java	mvdb	5	http://commons.apache.org/cli/	27
Apache Commons CLI	8659	638	Java	mdiggory	7	http://commons.apache.org/cli/	27
Apache Commons CLI	8659	638	Java	tobrien	7	http://commons.apache.org/cli/	27
Apache Commons CLI	8659	638	Java	ggregory	10	http://commons.apache.org/cli/	27
Apache Commons CLI	8659	638	Java	simonetripodi	10	http://commons.apache.org/cli/	27
Apache Commons CLI	8659	638	Java	niallp	18	http://commons.apache.org/cli/	27
Apache Commons CLI	8659	638	Java	olamy	18	http://commons.apache.org/cli/	27
Apache Commons CLI	8659	638	Java	sebb	26	http://commons.apache.org/cli/	27
Apache Commons CLI	8659	638	Java	tn	52	http://commons.apache.org/cli/	27
Apache Commons CLI	8659	638	Java	roxspring	69	http://commons.apache.org/cli/	27
Apache Commons CLI	8659	638	Java	jkeyes	111	http://commons.apache.org/cli/	27
Apache Commons CLI	8659	638	Java	ebourg	129	http://commons.apache.org/cli/	27
Apache Commons CLI	8659	638	Java	bayard	147	http://commons.apache.org/cli/	27
Apache Commons Codec	18223	1337	Java	antoine	1	http://commons.apache.org/codec/	23
Apache Commons Codec	18223	1337	Java	craigmcc	1	http://commons.apache.org/codec/	23
Apache Commons Codec	18223	1337	Java	jochen	1	http://commons.apache.org/codec/	23
Apache Commons Codec	18223	1337	Java	joehni	1	http://commons.apache.org/codec/	23
Apache Commons Codec	18223	1337	Java	olegk	1	http://commons.apache.org/codec/	23
Apache Commons Codec	18223	1337	Java	psteitz	1	http://commons.apache.org/codec/	23
Apache Commons Codec	18223	1337	Java	yoavs	1	http://commons.apache.org/codec/	23
Apache Commons Codec	18223	1337	Java	brett	2	http://commons.apache.org/codec/	23
Apache Commons Codec	18223	1337	Java	dion	2	http://commons.apache.org/codec/	23
Apache Commons Codec	18223	1337	Java	mbenson	2	http://commons.apache.org/codec/	23
Apache Commons Codec	18223	1337	Java	scolebourne	2	http://commons.apache.org/codec/	23
Apache Commons Codec	18223	1337	Java	dennisl	4	http://commons.apache.org/codec/	23
Apache Commons Codec	18223	1337	Java	dirkv	5	http://commons.apache.org/codec/	23
Apache Commons Codec	18223	1337	Java	olamy	5	http://commons.apache.org/codec/	23
Apache Commons Codec	18223	1337	Java	rahul	5	http://commons.apache.org/codec/	23
Apache Commons Codec	18223	1337	Java	mdiggory	6	http://commons.apache.org/codec/	23
Apache Commons Codec	18223	1337	Java	julius	12	http://commons.apache.org/codec/	23
Apache Commons Codec	18223	1337	Java	niallp	52	http://commons.apache.org/codec/	23
Apache Commons Codec	18223	1337	Java	tn	53	http://commons.apache.org/codec/	23
Apache Commons Codec	18223	1337	Java	bayard	65	http://commons.apache.org/codec/	23
Apache Commons Codec	18223	1337	Java	tobrien	89	http://commons.apache.org/codec/	23
Apache Commons Codec	18223	1337	Java	sebb	155	http://commons.apache.org/codec/	23
Apache Commons Codec	18223	1337	Java	ggregory	870	http://commons.apache.org/codec/	23
Apache Commons Collections	107778	4296	Java	adriannistor	1	http://commons.apache.org/proper/commons-collections/	44
Apache Commons Collections	107778	4296	Java	amamment	2	http://commons.apache.org/proper/commons-collections/	44
Apache Commons Collections	107778	4296	Java	brett	2	http://commons.apache.org/proper/commons-collections/	44
Apache Commons Collections	107778	4296	Java	costin	2	http://commons.apache.org/proper/commons-collections/	44
Apache Commons Collections	107778	4296	Java	dbrosius	2	http://commons.apache.org/proper/commons-collections/	44
Apache Commons Collections	107778	4296	Java	dims	2	http://commons.apache.org/proper/commons-collections/	44
Apache Commons Collections	107778	4296	Java	dion	2	http://commons.apache.org/proper/commons-collections/	44
Apache Commons Collections	107778	4296	Java	mvdb	2	http://commons.apache.org/proper/commons-collections/	44
Apache Commons Collections	107778	4296	Java	rahul	3	http://commons.apache.org/proper/commons-collections/	44
Apache Commons Collections	107778	4296	Java	arron	4	http://commons.apache.org/proper/commons-collections/	44
Apache Commons Collections	107778	4296	Java	jefft	4	http://commons.apache.org/proper/commons-collections/	44
Apache Commons Collections	107778	4296	Java	joehni	4	http://commons.apache.org/proper/commons-collections/	44
Apache Commons Collections	107778	4296	Java	luc	4	http://commons.apache.org/proper/commons-collections/	44
Apache Commons Collections	107778	4296	Java	nuttycom	4	http://commons.apache.org/proper/commons-collections/	44
Apache Commons Collections	107778	4296	Java	dlr	6	http://commons.apache.org/proper/commons-collections/	44
Apache Commons Collections	107778	4296	Java	jochen	6	http://commons.apache.org/proper/commons-collections/	44
Apache Commons Collections	107778	4296	Java	dirkv	8	http://commons.apache.org/proper/commons-collections/	44
Apache Commons Collections	107778	4296	Java	neilotoole	8	http://commons.apache.org/proper/commons-collections/	44
Apache Commons Collections	107778	4296	Java	tobrien	8	http://commons.apache.org/proper/commons-collections/	44
Apache Commons Collections	107778	4296	Java	dennisl	9	http://commons.apache.org/proper/commons-collections/	44
Apache Commons Collections	107778	4296	Java	ebourg	10	http://commons.apache.org/proper/commons-collections/	44
Apache Commons Collections	107778	4296	Java	matth	12	http://commons.apache.org/proper/commons-collections/	44
Apache Commons Collections	107778	4296	Java	mdiggory	12	http://commons.apache.org/proper/commons-collections/	44
Apache Commons Collections	107778	4296	Java	rdonkin	12	http://commons.apache.org/proper/commons-collections/	44
Apache Commons Collections	107778	4296	Java	olamy	13	http://commons.apache.org/proper/commons-collections/	44
Apache Commons Collections	107778	4296	Java	brentworden	18	http://commons.apache.org/proper/commons-collections/	44
Apache Commons Collections	107778	4296	Java	jvanzyl	18	http://commons.apache.org/proper/commons-collections/	44
Apache Commons Collections	107778	4296	Java	craigmcc	20	http://commons.apache.org/proper/commons-collections/	44
Apache Commons Collections	107778	4296	Java	jcarman	20	http://commons.apache.org/proper/commons-collections/	44
Apache Commons Collections	107778	4296	Java	skestle	30	http://commons.apache.org/proper/commons-collections/	44
Apache Commons Collections	107778	4296	Java	geirm	38	http://commons.apache.org/proper/commons-collections/	44
Apache Commons Collections	107778	4296	Java	jstrachan	46	http://commons.apache.org/proper/commons-collections/	44
Apache Commons Collections	107778	4296	Java	mbenson	53	http://commons.apache.org/proper/commons-collections/	44
Apache Commons Collections	107778	4296	Java	niallp	53	http://commons.apache.org/proper/commons-collections/	44
Apache Commons Collections	107778	4296	Java	ggregory	70	http://commons.apache.org/proper/commons-collections/	44
Apache Commons Collections	107778	4296	Java	pjack	78	http://commons.apache.org/proper/commons-collections/	44
Apache Commons Collections	107778	4296	Java	psteitz	82	http://commons.apache.org/proper/commons-collections/	44
Apache Commons Collections	107778	4296	Java	mas	144	http://commons.apache.org/proper/commons-collections/	44
Apache Commons Collections	107778	4296	Java	sebb	207	http://commons.apache.org/proper/commons-collections/	44
Apache Commons Collections	107778	4296	Java	morgand	266	http://commons.apache.org/proper/commons-collections/	44
Apache Commons Collections	107778	4296	Java	rwaldhoff	300	http://commons.apache.org/proper/commons-collections/	44
Apache Commons Collections	107778	4296	Java	bayard	352	http://commons.apache.org/proper/commons-collections/	44
Apache Commons Collections	107778	4296	Java	tn	504	http://commons.apache.org/proper/commons-collections/	44
Apache Commons Collections	107778	4296	Java	scolebourne	1854	http://commons.apache.org/proper/commons-collections/	44
Apache Commons Compress	32433	1364	Java	mbenson	1	http://commons.apache.org/proper/commons-compress/	15
Apache Commons Compress	32433	1364	Java	olamy	1	http://commons.apache.org/proper/commons-compress/	15
Apache Commons Compress	32433	1364	Java	sgoeschl	1	http://commons.apache.org/proper/commons-compress/	15
Apache Commons Compress	32433	1364	Java	bayard	2	http://commons.apache.org/proper/commons-compress/	15
Apache Commons Compress	32433	1364	Java	dennisl	6	http://commons.apache.org/proper/commons-compress/	15
Apache Commons Compress	32433	1364	Java	jukka	6	http://commons.apache.org/proper/commons-compress/	15
Apache Commons Compress	32433	1364	Java	julius	8	http://commons.apache.org/proper/commons-compress/	15
Apache Commons Compress	32433	1364	Java	niallp	9	http://commons.apache.org/proper/commons-compress/	15
Apache Commons Compress	32433	1364	Java	damjan	19	http://commons.apache.org/proper/commons-compress/	15
Apache Commons Compress	32433	1364	Java	tcurdt	31	http://commons.apache.org/proper/commons-compress/	15
Apache Commons Compress	32433	1364	Java	ebourg	37	http://commons.apache.org/proper/commons-compress/	15
Apache Commons Compress	32433	1364	Java	ggregory	62	http://commons.apache.org/proper/commons-compress/	15
Apache Commons Compress	32433	1364	Java	grobmeier	93	http://commons.apache.org/proper/commons-compress/	15
Apache Commons Compress	32433	1364	Java	sebb	387	http://commons.apache.org/proper/commons-compress/	15
Apache Commons Compress	32433	1364	Java	bodewig	701	http://commons.apache.org/proper/commons-compress/	15
Apache Commons Configuration	316396	2303	Java	mbenson	1	http://commons.apache.org/configuration/	22
Apache Commons Configuration	316396	2303	Java	olamy	1	http://commons.apache.org/configuration/	22
Apache Commons Configuration	316396	2303	Java	psteitz	1	http://commons.apache.org/configuration/	22
Apache Commons Configuration	316396	2303	Java	tn	1	http://commons.apache.org/configuration/	22
Apache Commons Configuration	316396	2303	Java	yoavs	1	http://commons.apache.org/configuration/	22
Apache Commons Configuration	316396	2303	Java	rdonkin	2	http://commons.apache.org/configuration/	22
Apache Commons Configuration	316396	2303	Java	rahul	4	http://commons.apache.org/configuration/	22
Apache Commons Configuration	316396	2303	Java	brett	5	http://commons.apache.org/configuration/	22
Apache Commons Configuration	316396	2303	Java	dennisl	5	http://commons.apache.org/configuration/	22
Apache Commons Configuration	316396	2303	Java	mdiggory	5	http://commons.apache.org/configuration/	22
Apache Commons Configuration	316396	2303	Java	tobrien	5	http://commons.apache.org/configuration/	22
Apache Commons Configuration	316396	2303	Java	dirkv	7	http://commons.apache.org/configuration/	22
Apache Commons Configuration	316396	2303	Java	sebb	9	http://commons.apache.org/configuration/	22
Apache Commons Configuration	316396	2303	Java	ggregory	16	http://commons.apache.org/configuration/	22
Apache Commons Configuration	316396	2303	Java	joehni	16	http://commons.apache.org/configuration/	22
Apache Commons Configuration	316396	2303	Java	bayard	19	http://commons.apache.org/configuration/	22
Apache Commons Configuration	316396	2303	Java	niallp	44	http://commons.apache.org/configuration/	22
Apache Commons Configuration	316396	2303	Java	henning	66	http://commons.apache.org/configuration/	22
Apache Commons Configuration	316396	2303	Java	rgoers	86	http://commons.apache.org/configuration/	22
Apache Commons Configuration	316396	2303	Java	epugh	106	http://commons.apache.org/configuration/	22
Apache Commons Configuration	316396	2303	Java	ebourg	308	http://commons.apache.org/configuration/	22
Apache Commons Configuration	316396	2303	Java	oheger	1591	http://commons.apache.org/configuration/	22
Apache Commons CSV	4779	803	Java	dbrosius	1	http://commons.apache.org/proper/commons-csv/index.html	17
Apache Commons CSV	4779	803	Java	rahul	1	http://commons.apache.org/proper/commons-csv/index.html	17
Apache Commons CSV	4779	803	Java	scolebourne	1	http://commons.apache.org/proper/commons-csv/index.html	17
Apache Commons CSV	4779	803	Java	joehni	2	http://commons.apache.org/proper/commons-csv/index.html	17
Apache Commons CSV	4779	803	Java	olamy	2	http://commons.apache.org/proper/commons-csv/index.html	17
Apache Commons CSV	4779	803	Java	mbenson	3	http://commons.apache.org/proper/commons-csv/index.html	17
Apache Commons CSV	4779	803	Java	oglueck	3	http://commons.apache.org/proper/commons-csv/index.html	17
Apache Commons CSV	4779	803	Java	mvdb	5	http://commons.apache.org/proper/commons-csv/index.html	17
Apache Commons CSV	4779	803	Java	dennisl	7	http://commons.apache.org/proper/commons-csv/index.html	17
Apache Commons CSV	4779	803	Java	jacopoc	8	http://commons.apache.org/proper/commons-csv/index.html	17
Apache Commons CSV	4779	803	Java	niallp	14	http://commons.apache.org/proper/commons-csv/index.html	17
Apache Commons CSV	4779	803	Java	yonik	19	http://commons.apache.org/proper/commons-csv/index.html	17
Apache Commons CSV	4779	803	Java	ebourg	61	http://commons.apache.org/proper/commons-csv/index.html	17
Apache Commons CSV	4779	803	Java	bayard	67	http://commons.apache.org/proper/commons-csv/index.html	17
Apache Commons CSV	4779	803	Java	britter	129	http://commons.apache.org/proper/commons-csv/index.html	17
Apache Commons CSV	4779	803	Java	sebb	205	http://commons.apache.org/proper/commons-csv/index.html	17
Apache Commons CSV	4779	803	Java	ggregory	275	http://commons.apache.org/proper/commons-csv/index.html	17
Apache Commons Daemon	21615	522	C	dennisl	1	http://www.fulldiziizleyelim.net/kacak-16bolum-izle-28-ocak-2014-tek-parca.html	12
Apache Commons Daemon	21615	522	C	ebourg	1	http://www.fulldiziizleyelim.net/kacak-16bolum-izle-28-ocak-2014-tek-parca.html	12
Apache Commons Daemon	21615	522	C	mbenson	1	http://www.fulldiziizleyelim.net/kacak-16bolum-izle-28-ocak-2014-tek-parca.html	12
Apache Commons Daemon	21615	522	C	olamy	1	http://www.fulldiziizleyelim.net/kacak-16bolum-izle-28-ocak-2014-tek-parca.html	12
Apache Commons Daemon	21615	522	C	rahul	1	http://www.fulldiziizleyelim.net/kacak-16bolum-izle-28-ocak-2014-tek-parca.html	12
Apache Commons Daemon	21615	522	C	bayard	5	http://www.fulldiziizleyelim.net/kacak-16bolum-izle-28-ocak-2014-tek-parca.html	12
Apache Commons Daemon	21615	522	C	markt	5	http://www.fulldiziizleyelim.net/kacak-16bolum-izle-28-ocak-2014-tek-parca.html	12
Apache Commons Daemon	21615	522	C	ggregory	6	http://www.fulldiziizleyelim.net/kacak-16bolum-izle-28-ocak-2014-tek-parca.html	12
Apache Commons Daemon	21615	522	C	billbarker	9	http://www.fulldiziizleyelim.net/kacak-16bolum-izle-28-ocak-2014-tek-parca.html	12
Apache Commons Daemon	21615	522	C	niallp	36	http://www.fulldiziizleyelim.net/kacak-16bolum-izle-28-ocak-2014-tek-parca.html	12
Apache Commons Daemon	21615	522	C	sebb	162	http://www.fulldiziizleyelim.net/kacak-16bolum-izle-28-ocak-2014-tek-parca.html	12
Apache Commons Daemon	21615	522	C	mturk	294	http://www.fulldiziizleyelim.net/kacak-16bolum-izle-28-ocak-2014-tek-parca.html	12
Apache Commons DBCP	21626	869	Java	brett	1	http://commons.apache.org/dbcp/	14
Apache Commons DBCP	21626	869	Java	tn	1	http://commons.apache.org/dbcp/	14
Apache Commons DBCP	21626	869	Java	mbenson	2	http://commons.apache.org/dbcp/	14
Apache Commons DBCP	21626	869	Java	dennisl	3	http://commons.apache.org/dbcp/	14
Apache Commons DBCP	21626	869	Java	olamy	3	http://commons.apache.org/dbcp/	14
Apache Commons DBCP	21626	869	Java	rahul	3	http://commons.apache.org/dbcp/	14
Apache Commons DBCP	21626	869	Java	dain	4	http://commons.apache.org/dbcp/	14
Apache Commons DBCP	21626	869	Java	joehni	8	http://commons.apache.org/dbcp/	14
Apache Commons DBCP	21626	869	Java	bayard	9	http://commons.apache.org/dbcp/	14
Apache Commons DBCP	21626	869	Java	ggregory	20	http://commons.apache.org/dbcp/	14
Apache Commons DBCP	21626	869	Java	niallp	33	http://commons.apache.org/dbcp/	14
Apache Commons DBCP	21626	869	Java	psteitz	205	http://commons.apache.org/dbcp/	14
Apache Commons DBCP	21626	869	Java	sebb	208	http://commons.apache.org/dbcp/	14
Apache Commons DBCP	21626	869	Java	markt	369	http://commons.apache.org/dbcp/	14
Apache Commons DbUtils	6863	383	Java	dennisl	1	http://commons.apache.org/dbutils/	13
Apache Commons DbUtils	6863	383	Java	mbenson	1	http://commons.apache.org/dbutils/	13
Apache Commons DbUtils	6863	383	Java	olamy	1	http://commons.apache.org/dbutils/	13
Apache Commons DbUtils	6863	383	Java	psteitz	1	http://commons.apache.org/dbutils/	13
Apache Commons DbUtils	6863	383	Java	rahul	1	http://commons.apache.org/dbutils/	13
Apache Commons DbUtils	6863	383	Java	britter	4	http://commons.apache.org/dbutils/	13
Apache Commons DbUtils	6863	383	Java	ggregory	5	http://commons.apache.org/dbutils/	13
Apache Commons DbUtils	6863	383	Java	niallp	25	http://commons.apache.org/dbutils/	13
Apache Commons DbUtils	6863	383	Java	wspeirs	26	http://commons.apache.org/dbutils/	13
Apache Commons DbUtils	6863	383	Java	bayard	43	http://commons.apache.org/dbutils/	13
Apache Commons DbUtils	6863	383	Java	dfabulich	65	http://commons.apache.org/dbutils/	13
Apache Commons DbUtils	6863	383	Java	sebb	88	http://commons.apache.org/dbutils/	13
Apache Commons DbUtils	6863	383	Java	simonetripodi	122	http://commons.apache.org/dbutils/	13
Apache Commons Digester	27055	1783	Java	brett	1	http://commons.apache.org/proper/commons-digester/	30
Apache Commons Digester	27055	1783	Java	geirm	1	http://commons.apache.org/proper/commons-digester/	30
Apache Commons Digester	27055	1783	Java	ggregory	1	http://commons.apache.org/proper/commons-digester/	30
Apache Commons Digester	27055	1783	Java	husted	1	http://commons.apache.org/proper/commons-digester/	30
Apache Commons Digester	27055	1783	Java	nuttycom	1	http://commons.apache.org/proper/commons-digester/	30
Apache Commons Digester	27055	1783	Java	psteitz	1	http://commons.apache.org/proper/commons-digester/	30
Apache Commons Digester	27055	1783	Java	scolebourne	1	http://commons.apache.org/proper/commons-digester/	30
Apache Commons Digester	27055	1783	Java	yoavs	1	http://commons.apache.org/proper/commons-digester/	30
Apache Commons Digester	27055	1783	Java	dion	2	http://commons.apache.org/proper/commons-digester/	30
Apache Commons Digester	27055	1783	Java	elijah	2	http://commons.apache.org/proper/commons-digester/	30
Apache Commons Digester	27055	1783	Java	jefft	2	http://commons.apache.org/proper/commons-digester/	30
Apache Commons Digester	27055	1783	Java	mvdb	2	http://commons.apache.org/proper/commons-digester/	30
Apache Commons Digester	27055	1783	Java	dirkv	3	http://commons.apache.org/proper/commons-digester/	30
Apache Commons Digester	27055	1783	Java	jvanzyl	4	http://commons.apache.org/proper/commons-digester/	30
Apache Commons Digester	27055	1783	Java	dennisl	5	http://commons.apache.org/proper/commons-digester/	30
Apache Commons Digester	27055	1783	Java	patrickl	5	http://commons.apache.org/proper/commons-digester/	30
Apache Commons Digester	27055	1783	Java	mbenson	6	http://commons.apache.org/proper/commons-digester/	30
Apache Commons Digester	27055	1783	Java	mdiggory	6	http://commons.apache.org/proper/commons-digester/	30
Apache Commons Digester	27055	1783	Java	jstrachan	8	http://commons.apache.org/proper/commons-digester/	30
Apache Commons Digester	27055	1783	Java	olamy	12	http://commons.apache.org/proper/commons-digester/	30
Apache Commons Digester	27055	1783	Java	tobrien	21	http://commons.apache.org/proper/commons-digester/	30
Apache Commons Digester	27055	1783	Java	bayard	22	http://commons.apache.org/proper/commons-digester/	30
Apache Commons Digester	27055	1783	Java	niallp	29	http://commons.apache.org/proper/commons-digester/	30
Apache Commons Digester	27055	1783	Java	sebb	29	http://commons.apache.org/proper/commons-digester/	30
Apache Commons Digester	27055	1783	Java	sanders	33	http://commons.apache.org/proper/commons-digester/	30
Apache Commons Digester	27055	1783	Java	craigmcc	99	http://commons.apache.org/proper/commons-digester/	30
Apache Commons Digester	27055	1783	Java	rahul	134	http://commons.apache.org/proper/commons-digester/	30
Apache Commons Digester	27055	1783	Java	rdonkin	155	http://commons.apache.org/proper/commons-digester/	30
Apache Commons Digester	27055	1783	Java	skitching	195	http://commons.apache.org/proper/commons-digester/	30
Apache Commons Digester	27055	1783	Java	simonetripodi	1001	http://commons.apache.org/proper/commons-digester/	30
Apache Commons Discovery	4055	365	Java	mbenson	1	http://commons.apache.org/discovery/	10
Apache Commons Discovery	4055	365	Java	olamy	1	http://commons.apache.org/discovery/	10
Apache Commons Discovery	4055	365	Java	psteitz	1	http://commons.apache.org/discovery/	10
Apache Commons Discovery	4055	365	Java	rahul	1	http://commons.apache.org/discovery/	10
Apache Commons Discovery	4055	365	Java	dennisl	2	http://commons.apache.org/discovery/	10
Apache Commons Discovery	4055	365	Java	ggregory	3	http://commons.apache.org/discovery/	10
Apache Commons Discovery	4055	365	Java	bayard	8	http://commons.apache.org/discovery/	10
Apache Commons Discovery	4055	365	Java	sebb	17	http://commons.apache.org/discovery/	10
Apache Commons Discovery	4055	365	Java	niallp	24	http://commons.apache.org/discovery/	10
Apache Commons Discovery	4055	365	Java	simonetripodi	307	http://commons.apache.org/discovery/	10
Apache Commons EL	8525	75	Java	ebourg	1	http://commons.apache.org/el/	8
Apache Commons EL	8525	75	Java	ggregory	1	http://commons.apache.org/el/	8
Apache Commons EL	8525	75	Java	rahul	1	http://commons.apache.org/el/	8
Apache Commons EL	8525	75	Java	sebb	7	http://commons.apache.org/el/	8
Apache Commons EL	8525	75	Java	olamy	8	http://commons.apache.org/el/	8
Apache Commons EL	8525	75	Java	bayard	14	http://commons.apache.org/el/	8
Apache Commons EL	8525	75	Java	niallp	21	http://commons.apache.org/el/	8
Apache Commons EL	8525	75	Java	mbenson	22	http://commons.apache.org/el/	8
Apache Commons Email	8661	680	Java	craigmcc	1	http://commons.apache.org/proper/commons-email/	24
Apache Commons Email	8661	680	Java	dims	1	http://commons.apache.org/proper/commons-email/	24
Apache Commons Email	8661	680	Java	germuska	1	http://commons.apache.org/proper/commons-email/	24
Apache Commons Email	8661	680	Java	proyal	1	http://commons.apache.org/proper/commons-email/	24
Apache Commons Email	8661	680	Java	psteitz	1	http://commons.apache.org/proper/commons-email/	24
Apache Commons Email	8661	680	Java	matzew	2	http://commons.apache.org/proper/commons-email/	24
Apache Commons Email	8661	680	Java	rahul	2	http://commons.apache.org/proper/commons-email/	24
Apache Commons Email	8661	680	Java	mdiggory	3	http://commons.apache.org/proper/commons-email/	24
Apache Commons Email	8661	680	Java	olamy	3	http://commons.apache.org/proper/commons-email/	24
Apache Commons Email	8661	680	Java	scolebourne	3	http://commons.apache.org/proper/commons-email/	24
Apache Commons Email	8661	680	Java	dennisl	4	http://commons.apache.org/proper/commons-email/	24
Apache Commons Email	8661	680	Java	dirkv	4	http://commons.apache.org/proper/commons-email/	24
Apache Commons Email	8661	680	Java	ggregory	5	http://commons.apache.org/proper/commons-email/	24
Apache Commons Email	8661	680	Java	rdonkin	10	http://commons.apache.org/proper/commons-email/	24
Apache Commons Email	8661	680	Java	epugh	24	http://commons.apache.org/proper/commons-email/	24
Apache Commons Email	8661	680	Java	bayard	25	http://commons.apache.org/proper/commons-email/	24
Apache Commons Email	8661	680	Java	henning	32	http://commons.apache.org/proper/commons-email/	24
Apache Commons Email	8661	680	Java	niallp	35	http://commons.apache.org/proper/commons-email/	24
Apache Commons Email	8661	680	Java	sebb	39	http://commons.apache.org/proper/commons-email/	24
Apache Commons Email	8661	680	Java	britter	48	http://commons.apache.org/proper/commons-email/	24
Apache Commons Email	8661	680	Java	bspeakmon	55	http://commons.apache.org/proper/commons-email/	24
Apache Commons Email	8661	680	Java	dion	107	http://commons.apache.org/proper/commons-email/	24
Apache Commons Email	8661	680	Java	tn	109	http://commons.apache.org/proper/commons-email/	24
Apache Commons Email	8661	680	Java	sgoeschl	165	http://commons.apache.org/proper/commons-email/	24
Apache Commons FileUpload	6707	513	Java	mbenson	1	http://commons.apache.org/fileupload	18
Apache Commons FileUpload	6707	513	Java	nick	1	http://commons.apache.org/fileupload	18
Apache Commons FileUpload	6707	513	Java	olamy	1	http://commons.apache.org/fileupload	18
Apache Commons FileUpload	6707	513	Java	psteitz	1	http://commons.apache.org/fileupload	18
Apache Commons FileUpload	6707	513	Java	rahul	1	http://commons.apache.org/fileupload	18
Apache Commons FileUpload	6707	513	Java	dennisl	2	http://commons.apache.org/fileupload	18
Apache Commons FileUpload	6707	513	Java	martinc	2	http://commons.apache.org/fileupload	18
Apache Commons FileUpload	6707	513	Java	britter	3	http://commons.apache.org/fileupload	18
Apache Commons FileUpload	6707	513	Java	ecki	3	http://commons.apache.org/fileupload	18
Apache Commons FileUpload	6707	513	Java	ebourg	4	http://commons.apache.org/fileupload	18
Apache Commons FileUpload	6707	513	Java	tn	5	http://commons.apache.org/fileupload	18
Apache Commons FileUpload	6707	513	Java	bayard	11	http://commons.apache.org/fileupload	18
Apache Commons FileUpload	6707	513	Java	ggregory	19	http://commons.apache.org/fileupload	18
Apache Commons FileUpload	6707	513	Java	niallp	26	http://commons.apache.org/fileupload	18
Apache Commons FileUpload	6707	513	Java	markt	30	http://commons.apache.org/fileupload	18
Apache Commons FileUpload	6707	513	Java	jochen	48	http://commons.apache.org/fileupload	18
Apache Commons FileUpload	6707	513	Java	sebb	97	http://commons.apache.org/fileupload	18
Apache Commons FileUpload	6707	513	Java	simonetripodi	258	http://commons.apache.org/fileupload	18
Apache Commons Imaging	38809	699	Java	tn	1	http://commons.apache.org/proper/commons-imaging/	12
Apache Commons Imaging	38809	699	Java	jeremias	2	http://commons.apache.org/proper/commons-imaging/	12
Apache Commons Imaging	38809	699	Java	mbenson	4	http://commons.apache.org/proper/commons-imaging/	12
Apache Commons Imaging	38809	699	Java	olamy	4	http://commons.apache.org/proper/commons-imaging/	12
Apache Commons Imaging	38809	699	Java	britter	5	http://commons.apache.org/proper/commons-imaging/	12
Apache Commons Imaging	38809	699	Java	cziegeler	18	http://commons.apache.org/proper/commons-imaging/	12
Apache Commons Imaging	38809	699	Java	niallp	20	http://commons.apache.org/proper/commons-imaging/	12
Apache Commons Imaging	38809	699	Java	ggregory	85	http://commons.apache.org/proper/commons-imaging/	12
Apache Commons Imaging	38809	699	Java	ebourg	88	http://commons.apache.org/proper/commons-imaging/	12
Apache Commons Imaging	38809	699	Java	sebb	89	http://commons.apache.org/proper/commons-imaging/	12
Apache Commons Imaging	38809	699	Java	cmchen	106	http://commons.apache.org/proper/commons-imaging/	12
Apache Commons Imaging	38809	699	Java	damjan	277	http://commons.apache.org/proper/commons-imaging/	12
Apache Commons Javaflow	3392	214	Java	brett	1	http://commons.apache.org/sandbox/javaflow/	11
Apache Commons Javaflow	3392	214	Java	rahul	1	http://commons.apache.org/sandbox/javaflow/	11
Apache Commons Javaflow	3392	214	Java	martinc	2	http://commons.apache.org/sandbox/javaflow/	11
Apache Commons Javaflow	3392	214	Java	sebb	2	http://commons.apache.org/sandbox/javaflow/	11
Apache Commons Javaflow	3392	214	Java	dennisl	5	http://commons.apache.org/sandbox/javaflow/	11
Apache Commons Javaflow	3392	214	Java	ebourg	5	http://commons.apache.org/sandbox/javaflow/	11
Apache Commons Javaflow	3392	214	Java	dirkv	7	http://commons.apache.org/sandbox/javaflow/	11
Apache Commons Javaflow	3392	214	Java	bayard	14	http://commons.apache.org/sandbox/javaflow/	11
Apache Commons Javaflow	3392	214	Java	niallp	14	http://commons.apache.org/sandbox/javaflow/	11
Apache Commons Javaflow	3392	214	Java	tcurdt	77	http://commons.apache.org/sandbox/javaflow/	11
Apache Commons Javaflow	3392	214	Java	kohsuke	85	http://commons.apache.org/sandbox/javaflow/	11
Apache Commons JCI	5790	165	Java	bodewig	1	http://commons.apache.org/jci/	13
Apache Commons JCI	5790	165	Java	jcarman	1	http://commons.apache.org/jci/	13
Apache Commons JCI	5790	165	Java	mbenson	1	http://commons.apache.org/jci/	13
Apache Commons JCI	5790	165	Java	olamy	1	http://commons.apache.org/jci/	13
Apache Commons JCI	5790	165	Java	psteitz	1	http://commons.apache.org/jci/	13
Apache Commons JCI	5790	165	Java	rahul	1	http://commons.apache.org/jci/	13
Apache Commons JCI	5790	165	Java	dennisl	2	http://commons.apache.org/jci/	13
Apache Commons JCI	5790	165	Java	ggregory	4	http://commons.apache.org/jci/	13
Apache Commons JCI	5790	165	Java	bayard	5	http://commons.apache.org/jci/	13
Apache Commons JCI	5790	165	Java	tcurdt	22	http://commons.apache.org/jci/	13
Apache Commons JCI	5790	165	Java	niallp	25	http://commons.apache.org/jci/	13
Apache Commons JCI	5790	165	Java	ebourg	46	http://commons.apache.org/jci/	13
Apache Commons JCI	5790	165	Java	sebb	55	http://commons.apache.org/jci/	13
Apache Commons Jelly	51745	16	Java	mbenson	1	http://commons.apache.org/proper/commons-jelly/	8
Apache Commons Jelly	51745	16	Java	niallp	1	http://commons.apache.org/proper/commons-jelly/	8
Apache Commons Jelly	51745	16	Java	olamy	1	http://commons.apache.org/proper/commons-jelly/	8
Apache Commons Jelly	51745	16	Java	rahul	1	http://commons.apache.org/proper/commons-jelly/	8
Apache Commons Jelly	51745	16	Java	sebb	1	http://commons.apache.org/proper/commons-jelly/	8
Apache Commons Jelly	51745	16	Java	dbrosius	2	http://commons.apache.org/proper/commons-jelly/	8
Apache Commons Jelly	51745	16	Java	dennisl	4	http://commons.apache.org/proper/commons-jelly/	8
Apache Commons Jelly	51745	16	Java	bayard	5	http://commons.apache.org/proper/commons-jelly/	8
Apache Commons JXPath	28310	556	Java	craigmcc	1	http://commons.apache.org/jxpath	20
Apache Commons JXPath	28310	556	Java	jstrachan	1	http://commons.apache.org/jxpath	20
Apache Commons JXPath	28310	556	Java	scolebourne	1	http://commons.apache.org/jxpath	20
Apache Commons JXPath	28310	556	Java	mvdb	2	http://commons.apache.org/jxpath	20
Apache Commons JXPath	28310	556	Java	dion	3	http://commons.apache.org/jxpath	20
Apache Commons JXPath	28310	556	Java	jvanzyl	3	http://commons.apache.org/jxpath	20
Apache Commons JXPath	28310	556	Java	rdonkin	3	http://commons.apache.org/jxpath	20
Apache Commons JXPath	28310	556	Java	dennisl	4	http://commons.apache.org/jxpath	20
Apache Commons JXPath	28310	556	Java	dirkv	4	http://commons.apache.org/jxpath	20
Apache Commons JXPath	28310	556	Java	olamy	4	http://commons.apache.org/jxpath	20
Apache Commons JXPath	28310	556	Java	rahul	4	http://commons.apache.org/jxpath	20
Apache Commons JXPath	28310	556	Java	mdiggory	5	http://commons.apache.org/jxpath	20
Apache Commons JXPath	28310	556	Java	dbrosius	6	http://commons.apache.org/jxpath	20
Apache Commons JXPath	28310	556	Java	ebourg	6	http://commons.apache.org/jxpath	20
Apache Commons JXPath	28310	556	Java	ggregory	6	http://commons.apache.org/jxpath	20
Apache Commons JXPath	28310	556	Java	sebb	9	http://commons.apache.org/jxpath	20
Apache Commons JXPath	28310	556	Java	bayard	15	http://commons.apache.org/jxpath	20
Apache Commons JXPath	28310	556	Java	niallp	40	http://commons.apache.org/jxpath	20
Apache Commons JXPath	28310	556	Java	mbenson	212	http://commons.apache.org/jxpath	20
Apache Commons JXPath	28310	556	Java	dmitri	227	http://commons.apache.org/jxpath	20
Apache Commons Lang	72483	2365	Java	ebourg	1	http://commons.apache.org/lang/	26
Apache Commons Lang	72483	2365	Java	luc	1	http://commons.apache.org/lang/	26
Apache Commons Lang	72483	2365	Java	rahul	1	http://commons.apache.org/lang/	26
Apache Commons Lang	72483	2365	Java	bodewig	2	http://commons.apache.org/lang/	26
Apache Commons Lang	72483	2365	Java	brentworden	2	http://commons.apache.org/lang/	26
Apache Commons Lang	72483	2365	Java	bspeakmon	2	http://commons.apache.org/lang/	26
Apache Commons Lang	72483	2365	Java	dennisl	2	http://commons.apache.org/lang/	26
Apache Commons Lang	72483	2365	Java	julius	2	http://commons.apache.org/lang/	26
Apache Commons Lang	72483	2365	Java	kinow	2	http://commons.apache.org/lang/	26
Apache Commons Lang	72483	2365	Java	mcucchiara	3	http://commons.apache.org/lang/	26
Apache Commons Lang	72483	2365	Java	psteitz	8	http://commons.apache.org/lang/	26
Apache Commons Lang	72483	2365	Java	chas	9	http://commons.apache.org/lang/	26
Apache Commons Lang	72483	2365	Java	pbenedict	12	http://commons.apache.org/lang/	26
Apache Commons Lang	72483	2365	Java	tn	12	http://commons.apache.org/lang/	26
Apache Commons Lang	72483	2365	Java	olamy	15	http://commons.apache.org/lang/	26
Apache Commons Lang	72483	2365	Java	djones	22	http://commons.apache.org/lang/	26
Apache Commons Lang	72483	2365	Java	jcarman	22	http://commons.apache.org/lang/	26
Apache Commons Lang	72483	2365	Java	joehni	38	http://commons.apache.org/lang/	26
Apache Commons Lang	72483	2365	Java	oheger	71	http://commons.apache.org/lang/	26
Apache Commons Lang	72483	2365	Java	scolebourne	72	http://commons.apache.org/lang/	26
Apache Commons Lang	72483	2365	Java	niallp	79	http://commons.apache.org/lang/	26
Apache Commons Lang	72483	2365	Java	mbenson	221	http://commons.apache.org/lang/	26
Apache Commons Lang	72483	2365	Java	britter	252	http://commons.apache.org/lang/	26
Apache Commons Lang	72483	2365	Java	ggregory	288	http://commons.apache.org/lang/	26
Apache Commons Lang	72483	2365	Java	sebb	442	http://commons.apache.org/lang/	26
Apache Commons Lang	72483	2365	Java	bayard	784	http://commons.apache.org/lang/	26
Apache Commons Launcher	2992	8027	Java	ab	1	http://commons.apache.org/launcher/	406
Apache Commons Launcher	2992	8027	Java	angela	1	http://commons.apache.org/launcher/	406
Apache Commons Launcher	2992	8027	Java	apatel	1	http://commons.apache.org/launcher/	406
Apache Commons Launcher	2992	8027	Java	bgoodin	1	http://commons.apache.org/launcher/	406
Apache Commons Launcher	2992	8027	Java	billbarker	1	http://commons.apache.org/launcher/	406
Apache Commons Launcher	2992	8027	Java	blitchfield	1	http://commons.apache.org/launcher/	406
Apache Commons Launcher	2992	8027	Java	bpendleton	1	http://commons.apache.org/launcher/	406
Apache Commons Launcher	2992	8027	Java	dane0101	1	http://commons.apache.org/launcher/	406
Apache Commons Launcher	2992	8027	Java	davenewton	1	http://commons.apache.org/launcher/	406
Apache Commons Launcher	2992	8027	Java	dbrosius	1	http://commons.apache.org/launcher/	406
Apache Commons Launcher	2992	8027	Java	deepal	1	http://commons.apache.org/launcher/	406
Apache Commons Launcher	2992	8027	Java	dimuthu	1	http://commons.apache.org/launcher/	406
Apache Commons Launcher	2992	8027	Java	donsez	1	http://commons.apache.org/launcher/	406
Apache Commons Launcher	2992	8027	Java	dushshantha	1	http://commons.apache.org/launcher/	406
Apache Commons Launcher	2992	8027	Java	ersiner	1	http://commons.apache.org/launcher/	406
Apache Commons Launcher	2992	8027	Java	etnu	1	http://commons.apache.org/launcher/	406
Apache Commons Launcher	2992	8027	Java	evanthika	1	http://commons.apache.org/launcher/	406
Apache Commons Launcher	2992	8027	Java	fielding	1	http://commons.apache.org/launcher/	406
Apache Commons Launcher	2992	8027	Java	fuzzylogic	1	http://commons.apache.org/launcher/	406
Apache Commons Launcher	2992	8027	Java	gatfora	1	http://commons.apache.org/launcher/	406
Apache Commons Launcher	2992	8027	Java	gbayon	1	http://commons.apache.org/launcher/	406
Apache Commons Launcher	2992	8027	Java	ggregory	1	http://commons.apache.org/launcher/	406
Apache Commons Launcher	2992	8027	Java	gtully	1	http://commons.apache.org/launcher/	406
Apache Commons Launcher	2992	8027	Java	hammant	1	http://commons.apache.org/launcher/	406
Apache Commons Launcher	2992	8027	Java	hcunico	1	http://commons.apache.org/launcher/	406
Apache Commons Launcher	2992	8027	Java	issac	1	http://commons.apache.org/launcher/	406
Apache Commons Launcher	2992	8027	Java	kb	1	http://commons.apache.org/launcher/	406
Apache Commons Launcher	2992	8027	Java	kevj	1	http://commons.apache.org/launcher/	406
Apache Commons Launcher	2992	8027	Java	lars	1	http://commons.apache.org/launcher/	406
Apache Commons Launcher	2992	8027	Java	lenzi	1	http://commons.apache.org/launcher/	406
Apache Commons Launcher	2992	8027	Java	maddoc	1	http://commons.apache.org/launcher/	406
Apache Commons Launcher	2992	8027	Java	mamta	1	http://commons.apache.org/launcher/	406
Apache Commons Launcher	2992	8027	Java	markh	1	http://commons.apache.org/launcher/	406
Apache Commons Launcher	2992	8027	Java	mheath	1	http://commons.apache.org/launcher/	406
Apache Commons Launcher	2992	8027	Java	milinda	1	http://commons.apache.org/launcher/	406
Apache Commons Launcher	2992	8027	Java	mjc	1	http://commons.apache.org/launcher/	406
Apache Commons Launcher	2992	8027	Java	mrisaliti	1	http://commons.apache.org/launcher/	406
Apache Commons Launcher	2992	8027	Java	mwebb	1	http://commons.apache.org/launcher/	406
Apache Commons Launcher	2992	8027	Java	ndbeyer	1	http://commons.apache.org/launcher/	406
Apache Commons Launcher	2992	8027	Java	niklas	1	http://commons.apache.org/launcher/	406
Apache Commons Launcher	2992	8027	Java	niq	1	http://commons.apache.org/launcher/	406
Apache Commons Launcher	2992	8027	Java	nmaves	1	http://commons.apache.org/launcher/	406
Apache Commons Launcher	2992	8027	Java	pini	1	http://commons.apache.org/launcher/	406
Apache Commons Launcher	2992	8027	Java	proyal	1	http://commons.apache.org/launcher/	406
Apache Commons Launcher	2992	8027	Java	rolandw	1	http://commons.apache.org/launcher/	406
Apache Commons Launcher	2992	8027	Java	rsivaram	1	http://commons.apache.org/launcher/	406
Apache Commons Launcher	2992	8027	Java	rubys	1	http://commons.apache.org/launcher/	406
Apache Commons Launcher	2992	8027	Java	sctemme	1	http://commons.apache.org/launcher/	406
Apache Commons Launcher	2992	8027	Java	sdeboy	1	http://commons.apache.org/launcher/	406
Apache Commons Launcher	2992	8027	Java	seade	1	http://commons.apache.org/launcher/	406
Apache Commons Launcher	2992	8027	Java	sergeyb	1	http://commons.apache.org/launcher/	406
Apache Commons Launcher	2992	8027	Java	sfrenot	1	http://commons.apache.org/launcher/	406
Apache Commons Launcher	2992	8027	Java	thomasm	1	http://commons.apache.org/launcher/	406
Apache Commons Launcher	2992	8027	Java	tomwhite	1	http://commons.apache.org/launcher/	406
Apache Commons Launcher	2992	8027	Java	trustin	1	http://commons.apache.org/launcher/	406
Apache Commons Launcher	2992	8027	Java	twgoetz	1	http://commons.apache.org/launcher/	406
Apache Commons Launcher	2992	8027	Java	upayavira	1	http://commons.apache.org/launcher/	406
Apache Commons Launcher	2992	8027	Java	vanto	1	http://commons.apache.org/launcher/	406
Apache Commons Launcher	2992	8027	Java	vgritsenko	1	http://commons.apache.org/launcher/	406
Apache Commons Launcher	2992	8027	Java	yhemanth	1	http://commons.apache.org/launcher/	406
Apache Commons Launcher	2992	8027	Java	zshao	1	http://commons.apache.org/launcher/	406
Apache Commons Launcher	2992	8027	Java	aaf	2	http://commons.apache.org/launcher/	406
Apache Commons Launcher	2992	8027	Java	adelmelle	2	http://commons.apache.org/launcher/	406
Apache Commons Launcher	2992	8027	Java	cbrisson	2	http://commons.apache.org/launcher/	406
Apache Commons Launcher	2992	8027	Java	chrisg	2	http://commons.apache.org/launcher/	406
Apache Commons Launcher	2992	8027	Java	chunrong	2	http://commons.apache.org/launcher/	406
Apache Commons Launcher	2992	8027	Java	ehatcher	2	http://commons.apache.org/launcher/	406
Apache Commons Launcher	2992	8027	Java	fpj	2	http://commons.apache.org/launcher/	406
Apache Commons Launcher	2992	8027	Java	gmazza	2	http://commons.apache.org/launcher/	406
Apache Commons Launcher	2992	8027	Java	grimsell	2	http://commons.apache.org/launcher/	406
Apache Commons Launcher	2992	8027	Java	jaz	2	http://commons.apache.org/launcher/	406
Apache Commons Launcher	2992	8027	Java	jdcryans	2	http://commons.apache.org/launcher/	406
Apache Commons Launcher	2992	8027	Java	jerenkrantz	2	http://commons.apache.org/launcher/	406
Apache Commons Launcher	2992	8027	Java	jkaputin	2	http://commons.apache.org/launcher/	406
Apache Commons Launcher	2992	8027	Java	joern	2	http://commons.apache.org/launcher/	406
Apache Commons Launcher	2992	8027	Java	jreijn	2	http://commons.apache.org/launcher/	406
Apache Commons Launcher	2992	8027	Java	kalle	2	http://commons.apache.org/launcher/	406
Apache Commons Launcher	2992	8027	Java	koji	2	http://commons.apache.org/launcher/	406
Apache Commons Launcher	2992	8027	Java	kpvdr	2	http://commons.apache.org/launcher/	406
Apache Commons Launcher	2992	8027	Java	leif	2	http://commons.apache.org/launcher/	406
Apache Commons Launcher	2992	8027	Java	lhein	2	http://commons.apache.org/launcher/	406
Apache Commons Launcher	2992	8027	Java	manugeorge	2	http://commons.apache.org/launcher/	406
Apache Commons Launcher	2992	8027	Java	mfreedman	2	http://commons.apache.org/launcher/	406
Apache Commons Launcher	2992	8027	Java	mmartinec	2	http://commons.apache.org/launcher/	406
Apache Commons Launcher	2992	8027	Java	mullan	2	http://commons.apache.org/launcher/	406
Apache Commons Launcher	2992	8027	Java	pauls	2	http://commons.apache.org/launcher/	406
Apache Commons Launcher	2992	8027	Java	pcl	2	http://commons.apache.org/launcher/	406
Apache Commons Launcher	2992	8027	Java	psteitz	2	http://commons.apache.org/launcher/	406
Apache Commons Launcher	2992	8027	Java	rajith	2	http://commons.apache.org/launcher/	406
Apache Commons Launcher	2992	8027	Java	rgardler	2	http://commons.apache.org/launcher/	406
Apache Commons Launcher	2992	8027	Java	rwinston	2	http://commons.apache.org/launcher/	406
Apache Commons Launcher	2992	8027	Java	shivahr	2	http://commons.apache.org/launcher/	406
Apache Commons Launcher	2992	8027	Java	shv	2	http://commons.apache.org/launcher/	406
Apache Commons Launcher	2992	8027	Java	sidney	2	http://commons.apache.org/launcher/	406
Apache Commons Launcher	2992	8027	Java	spepping	2	http://commons.apache.org/launcher/	406
Apache Commons Launcher	2992	8027	Java	stefan	2	http://commons.apache.org/launcher/	406
Apache Commons Launcher	2992	8027	Java	stoddard	2	http://commons.apache.org/launcher/	406
Apache Commons Launcher	2992	8027	Java	takashi	2	http://commons.apache.org/launcher/	406
Apache Commons Launcher	2992	8027	Java	torsten	2	http://commons.apache.org/launcher/	406
Apache Commons Launcher	2992	8027	Java	tv	2	http://commons.apache.org/launcher/	406
Apache Commons Launcher	2992	8027	Java	akornev	3	http://commons.apache.org/launcher/	406
Apache Commons Launcher	2992	8027	Java	andyj	3	http://commons.apache.org/launcher/	406
Apache Commons Launcher	2992	8027	Java	asmuts	3	http://commons.apache.org/launcher/	406
Apache Commons Launcher	2992	8027	Java	awhite	3	http://commons.apache.org/launcher/	406
Apache Commons Launcher	2992	8027	Java	berndf	3	http://commons.apache.org/launcher/	406
Apache Commons Launcher	2992	8027	Java	cam	3	http://commons.apache.org/launcher/	406
Apache Commons Launcher	2992	8027	Java	dag	3	http://commons.apache.org/launcher/	406
Apache Commons Launcher	2992	8027	Java	dezzio	3	http://commons.apache.org/launcher/	406
Apache Commons Launcher	2992	8027	Java	dinesh	3	http://commons.apache.org/launcher/	406
Apache Commons Launcher	2992	8027	Java	eranga	3	http://commons.apache.org/launcher/	406
Apache Commons Launcher	2992	8027	Java	hazems	3	http://commons.apache.org/launcher/	406
Apache Commons Launcher	2992	8027	Java	jan	3	http://commons.apache.org/launcher/	406
Apache Commons Launcher	2992	8027	Java	kmalhi	3	http://commons.apache.org/launcher/	406
Apache Commons Launcher	2992	8027	Java	mcombellack	3	http://commons.apache.org/launcher/	406
Apache Commons Launcher	2992	8027	Java	nd	3	http://commons.apache.org/launcher/	406
Apache Commons Launcher	2992	8027	Java	nicolas	3	http://commons.apache.org/launcher/	406
Apache Commons Launcher	2992	8027	Java	nigel	3	http://commons.apache.org/launcher/	406
Apache Commons Launcher	2992	8027	Java	odeakin	3	http://commons.apache.org/launcher/	406
Apache Commons Launcher	2992	8027	Java	psmith	3	http://commons.apache.org/launcher/	406
Apache Commons Launcher	2992	8027	Java	qiuxx	3	http://commons.apache.org/launcher/	406
Apache Commons Launcher	2992	8027	Java	rott	3	http://commons.apache.org/launcher/	406
Apache Commons Launcher	2992	8027	Java	yoavs	3	http://commons.apache.org/launcher/	406
Apache Commons Launcher	2992	8027	Java	ate	4	http://commons.apache.org/launcher/	406
Apache Commons Launcher	2992	8027	Java	christian	4	http://commons.apache.org/launcher/	406
Apache Commons Launcher	2992	8027	Java	damrhei	4	http://commons.apache.org/launcher/	406
Apache Commons Launcher	2992	8027	Java	dantran	4	http://commons.apache.org/launcher/	406
Apache Commons Launcher	2992	8027	Java	doronc	4	http://commons.apache.org/launcher/	406
Apache Commons Launcher	2992	8027	Java	drobiazko	4	http://commons.apache.org/launcher/	406
Apache Commons Launcher	2992	8027	Java	duncf	4	http://commons.apache.org/launcher/	406
Apache Commons Launcher	2992	8027	Java	elemings	4	http://commons.apache.org/launcher/	406
Apache Commons Launcher	2992	8027	Java	faridz	4	http://commons.apache.org/launcher/	406
Apache Commons Launcher	2992	8027	Java	funkman	4	http://commons.apache.org/launcher/	406
Apache Commons Launcher	2992	8027	Java	indika	4	http://commons.apache.org/launcher/	406
Apache Commons Launcher	2992	8027	Java	jfaath	4	http://commons.apache.org/launcher/	406
Apache Commons Launcher	2992	8027	Java	jgbutler	4	http://commons.apache.org/launcher/	406
Apache Commons Launcher	2992	8027	Java	lofwyr	4	http://commons.apache.org/launcher/	406
Apache Commons Launcher	2992	8027	Java	niclas	4	http://commons.apache.org/launcher/	406
Apache Commons Launcher	2992	8027	Java	oglueck	4	http://commons.apache.org/launcher/	406
Apache Commons Launcher	2992	8027	Java	rickmcguire	4	http://commons.apache.org/launcher/	406
Apache Commons Launcher	2992	8027	Java	scottkurz	4	http://commons.apache.org/launcher/	406
Apache Commons Launcher	2992	8027	Java	sichen	4	http://commons.apache.org/launcher/	406
Apache Commons Launcher	2992	8027	Java	snicoll	4	http://commons.apache.org/launcher/	406
Apache Commons Launcher	2992	8027	Java	tabish	4	http://commons.apache.org/launcher/	406
Apache Commons Launcher	2992	8027	Java	tripod	4	http://commons.apache.org/launcher/	406
Apache Commons Launcher	2992	8027	Java	ulhasbhole	4	http://commons.apache.org/launcher/	406
Apache Commons Launcher	2992	8027	Java	andreas	5	http://commons.apache.org/launcher/	406
Apache Commons Launcher	2992	8027	Java	arobinson74	5	http://commons.apache.org/launcher/	406
Apache Commons Launcher	2992	8027	Java	brushed	5	http://commons.apache.org/launcher/	406
Apache Commons Launcher	2992	8027	Java	cutting	5	http://commons.apache.org/launcher/	406
Apache Commons Launcher	2992	8027	Java	dain	5	http://commons.apache.org/launcher/	406
Apache Commons Launcher	2992	8027	Java	hughesj	5	http://commons.apache.org/launcher/	406
Apache Commons Launcher	2992	8027	Java	jawarner	5	http://commons.apache.org/launcher/	406
Apache Commons Launcher	2992	8027	Java	jglick	5	http://commons.apache.org/launcher/	406
Apache Commons Launcher	2992	8027	Java	johan	5	http://commons.apache.org/launcher/	406
Apache Commons Launcher	2992	8027	Java	kahatlen	5	http://commons.apache.org/launcher/	406
Apache Commons Launcher	2992	8027	Java	kclark	5	http://commons.apache.org/launcher/	406
Apache Commons Launcher	2992	8027	Java	mikemccand	5	http://commons.apache.org/launcher/	406
Apache Commons Launcher	2992	8027	Java	nandika	5	http://commons.apache.org/launcher/	406
Apache Commons Launcher	2992	8027	Java	otis	5	http://commons.apache.org/launcher/	406
Apache Commons Launcher	2992	8027	Java	pisong	5	http://commons.apache.org/launcher/	406
Apache Commons Launcher	2992	8027	Java	remm	5	http://commons.apache.org/launcher/	406
Apache Commons Launcher	2992	8027	Java	tellison	5	http://commons.apache.org/launcher/	406
Apache Commons Launcher	2992	8027	Java	yegor	5	http://commons.apache.org/launcher/	406
Apache Commons Launcher	2992	8027	Java	adc	6	http://commons.apache.org/launcher/	406
Apache Commons Launcher	2992	8027	Java	arnaudsimon	6	http://commons.apache.org/launcher/	406
Apache Commons Launcher	2992	8027	Java	bayard	6	http://commons.apache.org/launcher/	406
Apache Commons Launcher	2992	8027	Java	brianf	6	http://commons.apache.org/launcher/	406
Apache Commons Launcher	2992	8027	Java	fhanik	6	http://commons.apache.org/launcher/	406
Apache Commons Launcher	2992	8027	Java	jalkanen	6	http://commons.apache.org/launcher/	406
Apache Commons Launcher	2992	8027	Java	jlaskowski	6	http://commons.apache.org/launcher/	406
Apache Commons Launcher	2992	8027	Java	joes	6	http://commons.apache.org/launcher/	406
Apache Commons Launcher	2992	8027	Java	kmenard	6	http://commons.apache.org/launcher/	406
Apache Commons Launcher	2992	8027	Java	kwsutter	6	http://commons.apache.org/launcher/	406
Apache Commons Launcher	2992	8027	Java	rangadi	6	http://commons.apache.org/launcher/	406
Apache Commons Launcher	2992	8027	Java	ruwan	6	http://commons.apache.org/launcher/	406
Apache Commons Launcher	2992	8027	Java	sjanuary	6	http://commons.apache.org/launcher/	406
Apache Commons Launcher	2992	8027	Java	taylor	6	http://commons.apache.org/launcher/	406
Apache Commons Launcher	2992	8027	Java	tdonovan	6	http://commons.apache.org/launcher/	406
Apache Commons Launcher	2992	8027	Java	amassari	7	http://commons.apache.org/launcher/	406
Apache Commons Launcher	2992	8027	Java	dashorst	7	http://commons.apache.org/launcher/	406
Apache Commons Launcher	2992	8027	Java	johnh	7	http://commons.apache.org/launcher/	406
Apache Commons Launcher	2992	8027	Java	jonesde	7	http://commons.apache.org/launcher/	406
Apache Commons Launcher	2992	8027	Java	mckierna	7	http://commons.apache.org/launcher/	406
Apache Commons Launcher	2992	8027	Java	phunt	7	http://commons.apache.org/launcher/	406
Apache Commons Launcher	2992	8027	Java	rfrovarp	7	http://commons.apache.org/launcher/	406
Apache Commons Launcher	2992	8027	Java	sobryan	7	http://commons.apache.org/launcher/	406
Apache Commons Launcher	2992	8027	Java	ssegu	7	http://commons.apache.org/launcher/	406
Apache Commons Launcher	2992	8027	Java	aadamchik	8	http://commons.apache.org/launcher/	406
Apache Commons Launcher	2992	8027	Java	amaniatis	8	http://commons.apache.org/launcher/	406
Apache Commons Launcher	2992	8027	Java	bibryam	8	http://commons.apache.org/launcher/	406
Apache Commons Launcher	2992	8027	Java	covener	8	http://commons.apache.org/launcher/	406
Apache Commons Launcher	2992	8027	Java	dhruba	8	http://commons.apache.org/launcher/	406
Apache Commons Launcher	2992	8027	Java	fancy	8	http://commons.apache.org/launcher/	406
Apache Commons Launcher	2992	8027	Java	gdaniels	8	http://commons.apache.org/launcher/	406
Apache Commons Launcher	2992	8027	Java	hairong	8	http://commons.apache.org/launcher/	406
Apache Commons Launcher	2992	8027	Java	hiranya	8	http://commons.apache.org/launcher/	406
Apache Commons Launcher	2992	8027	Java	jorton	8	http://commons.apache.org/launcher/	406
Apache Commons Launcher	2992	8027	Java	kstam	8	http://commons.apache.org/launcher/	406
Apache Commons Launcher	2992	8027	Java	pradine	8	http://commons.apache.org/launcher/	406
Apache Commons Launcher	2992	8027	Java	bimargulies	9	http://commons.apache.org/launcher/	406
Apache Commons Launcher	2992	8027	Java	borisk	9	http://commons.apache.org/launcher/	406
Apache Commons Launcher	2992	8027	Java	carlos	9	http://commons.apache.org/launcher/	406
Apache Commons Launcher	2992	8027	Java	chaase3	9	http://commons.apache.org/launcher/	406
Apache Commons Launcher	2992	8027	Java	gscokart	9	http://commons.apache.org/launcher/	406
Apache Commons Launcher	2992	8027	Java	hindessm	9	http://commons.apache.org/launcher/	406
Apache Commons Launcher	2992	8027	Java	jdumay	9	http://commons.apache.org/launcher/	406
Apache Commons Launcher	2992	8027	Java	jgallimore	9	http://commons.apache.org/launcher/	406
Apache Commons Launcher	2992	8027	Java	kelvingoodson	9	http://commons.apache.org/launcher/	406
Apache Commons Launcher	2992	8027	Java	mcaisse	9	http://commons.apache.org/launcher/	406
Apache Commons Launcher	2992	8027	Java	midon	9	http://commons.apache.org/launcher/	406
Apache Commons Launcher	2992	8027	Java	trawick	9	http://commons.apache.org/launcher/	406
Apache Commons Launcher	2992	8027	Java	vhennebert	9	http://commons.apache.org/launcher/	406
Apache Commons Launcher	2992	8027	Java	wjaniszewski	9	http://commons.apache.org/launcher/	406
Apache Commons Launcher	2992	8027	Java	beaton	10	http://commons.apache.org/launcher/	406
Apache Commons Launcher	2992	8027	Java	cdoremus	10	http://commons.apache.org/launcher/	406
Apache Commons Launcher	2992	8027	Java	kristwaa	10	http://commons.apache.org/launcher/	406
Apache Commons Launcher	2992	8027	Java	lindner	10	http://commons.apache.org/launcher/	406
Apache Commons Launcher	2992	8027	Java	lryan	10	http://commons.apache.org/launcher/	406
Apache Commons Launcher	2992	8027	Java	mahadev	10	http://commons.apache.org/launcher/	406
Apache Commons Launcher	2992	8027	Java	mturk	10	http://commons.apache.org/launcher/	406
Apache Commons Launcher	2992	8027	Java	seanoc	10	http://commons.apache.org/launcher/	406
Apache Commons Launcher	2992	8027	Java	tomdz	10	http://commons.apache.org/launcher/	406
Apache Commons Launcher	2992	8027	Java	vamsic007	10	http://commons.apache.org/launcher/	406
Apache Commons Launcher	2992	8027	Java	amilas	11	http://commons.apache.org/launcher/	406
Apache Commons Launcher	2992	8027	Java	cctrieloff	11	http://commons.apache.org/launcher/	406
Apache Commons Launcher	2992	8027	Java	ddas	11	http://commons.apache.org/launcher/	406
Apache Commons Launcher	2992	8027	Java	dfabulich	11	http://commons.apache.org/launcher/	406
Apache Commons Launcher	2992	8027	Java	gmcdonald	11	http://commons.apache.org/launcher/	406
Apache Commons Launcher	2992	8027	Java	hossman	11	http://commons.apache.org/launcher/	406
Apache Commons Launcher	2992	8027	Java	lektran	11	http://commons.apache.org/launcher/	406
Apache Commons Launcher	2992	8027	Java	maartenc	11	http://commons.apache.org/launcher/	406
Apache Commons Launcher	2992	8027	Java	schor	11	http://commons.apache.org/launcher/	406
Apache Commons Launcher	2992	8027	Java	sjlee	11	http://commons.apache.org/launcher/	406
Apache Commons Launcher	2992	8027	Java	tkirby	11	http://commons.apache.org/launcher/	406
Apache Commons Launcher	2992	8027	Java	tross	11	http://commons.apache.org/launcher/	406
Apache Commons Launcher	2992	8027	Java	apetrelli	12	http://commons.apache.org/launcher/	406
Apache Commons Launcher	2992	8027	Java	furfari	12	http://commons.apache.org/launcher/	406
Apache Commons Launcher	2992	8027	Java	metskem	12	http://commons.apache.org/launcher/	406
Apache Commons Launcher	2992	8027	Java	musachy	12	http://commons.apache.org/launcher/	406
Apache Commons Launcher	2992	8027	Java	seelmann	12	http://commons.apache.org/launcher/	406
Apache Commons Launcher	2992	8027	Java	supun	12	http://commons.apache.org/launcher/	406
Apache Commons Launcher	2992	8027	Java	yunfengma	12	http://commons.apache.org/launcher/	406
Apache Commons Launcher	2992	8027	Java	ashish	13	http://commons.apache.org/launcher/	406
Apache Commons Launcher	2992	8027	Java	calavera	13	http://commons.apache.org/launcher/	406
Apache Commons Launcher	2992	8027	Java	dreiss	13	http://commons.apache.org/launcher/	406
Apache Commons Launcher	2992	8027	Java	evenisse	13	http://commons.apache.org/launcher/	406
Apache Commons Launcher	2992	8027	Java	felixk	13	http://commons.apache.org/launcher/	406
Apache Commons Launcher	2992	8027	Java	hadrian	13	http://commons.apache.org/launcher/	406
Apache Commons Launcher	2992	8027	Java	keithc	13	http://commons.apache.org/launcher/	406
Apache Commons Launcher	2992	8027	Java	rbowen	13	http://commons.apache.org/launcher/	406
Apache Commons Launcher	2992	8027	Java	rhillegas	13	http://commons.apache.org/launcher/	406
Apache Commons Launcher	2992	8027	Java	shankar	13	http://commons.apache.org/launcher/	406
Apache Commons Launcher	2992	8027	Java	aconway	14	http://commons.apache.org/launcher/	406
Apache Commons Launcher	2992	8027	Java	cmlenz	14	http://commons.apache.org/launcher/	406
Apache Commons Launcher	2992	8027	Java	jim	14	http://commons.apache.org/launcher/	406
Apache Commons Launcher	2992	8027	Java	kayyagari	14	http://commons.apache.org/launcher/	406
Apache Commons Launcher	2992	8027	Java	luc	14	http://commons.apache.org/launcher/	406
Apache Commons Launcher	2992	8027	Java	mrdon	14	http://commons.apache.org/launcher/	406
Apache Commons Launcher	2992	8027	Java	oheger	14	http://commons.apache.org/launcher/	406
Apache Commons Launcher	2992	8027	Java	allee8285	15	http://commons.apache.org/launcher/	406
Apache Commons Launcher	2992	8027	Java	damien	15	http://commons.apache.org/launcher/	406
Apache Commons Launcher	2992	8027	Java	dbertoni	15	http://commons.apache.org/launcher/	406
Apache Commons Launcher	2992	8027	Java	jvermillard	15	http://commons.apache.org/launcher/	406
Apache Commons Launcher	2992	8027	Java	mbenson	15	http://commons.apache.org/launcher/	406
Apache Commons Launcher	2992	8027	Java	rajdavies	15	http://commons.apache.org/launcher/	406
Apache Commons Launcher	2992	8027	Java	crossley	16	http://commons.apache.org/launcher/	406
Apache Commons Launcher	2992	8027	Java	gates	16	http://commons.apache.org/launcher/	406
Apache Commons Launcher	2992	8027	Java	jochen	16	http://commons.apache.org/launcher/	406
Apache Commons Launcher	2992	8027	Java	mrglavas	16	http://commons.apache.org/launcher/	406
Apache Commons Launcher	2992	8027	Java	myrnavl	16	http://commons.apache.org/launcher/	406
Apache Commons Launcher	2992	8027	Java	olegk	16	http://commons.apache.org/launcher/	406
Apache Commons Launcher	2992	8027	Java	pctony	16	http://commons.apache.org/launcher/	406
Apache Commons Launcher	2992	8027	Java	rahul	16	http://commons.apache.org/launcher/	406
Apache Commons Launcher	2992	8027	Java	xavier	16	http://commons.apache.org/launcher/	406
Apache Commons Launcher	2992	8027	Java	acmurthy	17	http://commons.apache.org/launcher/	406
Apache Commons Launcher	2992	8027	Java	boisvert	17	http://commons.apache.org/launcher/	406
Apache Commons Launcher	2992	8027	Java	edeoliveira	17	http://commons.apache.org/launcher/	406
Apache Commons Launcher	2992	8027	Java	jdillon	17	http://commons.apache.org/launcher/	406
Apache Commons Launcher	2992	8027	Java	mreutegg	17	http://commons.apache.org/launcher/	406
Apache Commons Launcher	2992	8027	Java	nadiramra	17	http://commons.apache.org/launcher/	406
Apache Commons Launcher	2992	8027	Java	aroush	18	http://commons.apache.org/launcher/	406
Apache Commons Launcher	2992	8027	Java	bdelacretaz	18	http://commons.apache.org/launcher/	406
Apache Commons Launcher	2992	8027	Java	clr	18	http://commons.apache.org/launcher/	406
Apache Commons Launcher	2992	8027	Java	ieb	18	http://commons.apache.org/launcher/	406
Apache Commons Launcher	2992	8027	Java	nash	18	http://commons.apache.org/launcher/	406
Apache Commons Launcher	2992	8027	Java	rickhall	18	http://commons.apache.org/launcher/	406
Apache Commons Launcher	2992	8027	Java	aidan	19	http://commons.apache.org/launcher/	406
Apache Commons Launcher	2992	8027	Java	astitcher	19	http://commons.apache.org/launcher/	406
Apache Commons Launcher	2992	8027	Java	ltheussl	19	http://commons.apache.org/launcher/	406
Apache Commons Launcher	2992	8027	Java	manjula	19	http://commons.apache.org/launcher/	406
Apache Commons Launcher	2992	8027	Java	srowen	19	http://commons.apache.org/launcher/	406
Apache Commons Launcher	2992	8027	Java	thorsten	19	http://commons.apache.org/launcher/	406
Apache Commons Launcher	2992	8027	Java	bodewig	20	http://commons.apache.org/launcher/	406
Apache Commons Launcher	2992	8027	Java	cdouglas	20	http://commons.apache.org/launcher/	406
Apache Commons Launcher	2992	8027	Java	jimk	20	http://commons.apache.org/launcher/	406
Apache Commons Launcher	2992	8027	Java	oching	20	http://commons.apache.org/launcher/	406
Apache Commons Launcher	2992	8027	Java	olga	20	http://commons.apache.org/launcher/	406
Apache Commons Launcher	2992	8027	Java	djencks	21	http://commons.apache.org/launcher/	406
Apache Commons Launcher	2992	8027	Java	ritchiem	21	http://commons.apache.org/launcher/	406
Apache Commons Launcher	2992	8027	Java	wrowe	21	http://commons.apache.org/launcher/	406
Apache Commons Launcher	2992	8027	Java	clement	22	http://commons.apache.org/launcher/	406
Apache Commons Launcher	2992	8027	Java	eae	22	http://commons.apache.org/launcher/	406
Apache Commons Launcher	2992	8027	Java	edalquist	22	http://commons.apache.org/launcher/	406
Apache Commons Launcher	2992	8027	Java	kmarsden	22	http://commons.apache.org/launcher/	406
Apache Commons Launcher	2992	8027	Java	sebb	22	http://commons.apache.org/launcher/	406
Apache Commons Launcher	2992	8027	Java	sebor	22	http://commons.apache.org/launcher/	406
Apache Commons Launcher	2992	8027	Java	linsun	23	http://commons.apache.org/launcher/	406
Apache Commons Launcher	2992	8027	Java	mcculls	23	http://commons.apache.org/launcher/	406
Apache Commons Launcher	2992	8027	Java	yonik	23	http://commons.apache.org/launcher/	406
Apache Commons Launcher	2992	8027	Java	doebele	24	http://commons.apache.org/launcher/	406
Apache Commons Launcher	2992	8027	Java	doll	24	http://commons.apache.org/launcher/	406
Apache Commons Launcher	2992	8027	Java	gpetracek	24	http://commons.apache.org/launcher/	406
Apache Commons Launcher	2992	8027	Java	mcconne	24	http://commons.apache.org/launcher/	406
Apache Commons Launcher	2992	8027	Java	scheu	24	http://commons.apache.org/launcher/	406
Apache Commons Launcher	2992	8027	Java	cmchen	25	http://commons.apache.org/launcher/	406
Apache Commons Launcher	2992	8027	Java	dwoods	25	http://commons.apache.org/launcher/	406
Apache Commons Launcher	2992	8027	Java	bojan	26	http://commons.apache.org/launcher/	406
Apache Commons Launcher	2992	8027	Java	ivaynberg	26	http://commons.apache.org/launcher/	406
Apache Commons Launcher	2992	8027	Java	nslater	26	http://commons.apache.org/launcher/	406
Apache Commons Launcher	2992	8027	Java	ryan	26	http://commons.apache.org/launcher/	406
Apache Commons Launcher	2992	8027	Java	acumiskey	27	http://commons.apache.org/launcher/	406
Apache Commons Launcher	2992	8027	Java	gkossakowski	27	http://commons.apache.org/launcher/	406
Apache Commons Launcher	2992	8027	Java	janb	27	http://commons.apache.org/launcher/	406
Apache Commons Launcher	2992	8027	Java	vitek	27	http://commons.apache.org/launcher/	406
Apache Commons Launcher	2992	8027	Java	dos	28	http://commons.apache.org/launcher/	406
Apache Commons Launcher	2992	8027	Java	hibou	28	http://commons.apache.org/launcher/	406
Apache Commons Launcher	2992	8027	Java	rpluem	28	http://commons.apache.org/launcher/	406
Apache Commons Launcher	2992	8027	Java	sgoeschl	28	http://commons.apache.org/launcher/	406
Apache Commons Launcher	2992	8027	Java	wsmoak	28	http://commons.apache.org/launcher/	406
Apache Commons Launcher	2992	8027	Java	bommel	29	http://commons.apache.org/launcher/	406
Apache Commons Launcher	2992	8027	Java	fmeschbe	29	http://commons.apache.org/launcher/	406
Apache Commons Launcher	2992	8027	Java	nandana	29	http://commons.apache.org/launcher/	406
Apache Commons Launcher	2992	8027	Java	chabotc	30	http://commons.apache.org/launcher/	406
Apache Commons Launcher	2992	8027	Java	mriou	30	http://commons.apache.org/launcher/	406
Apache Commons Launcher	2992	8027	Java	reiher	30	http://commons.apache.org/launcher/	406
Apache Commons Launcher	2992	8027	Java	josh	31	http://commons.apache.org/launcher/	406
Apache Commons Launcher	2992	8027	Java	jsdelfino	31	http://commons.apache.org/launcher/	406
Apache Commons Launcher	2992	8027	Java	nilgun	31	http://commons.apache.org/launcher/	406
Apache Commons Launcher	2992	8027	Java	rhs	31	http://commons.apache.org/launcher/	406
Apache Commons Launcher	2992	8027	Java	adrianc	32	http://commons.apache.org/launcher/	406
Apache Commons Launcher	2992	8027	Java	carnold	32	http://commons.apache.org/launcher/	406
Apache Commons Launcher	2992	8027	Java	cbegin	32	http://commons.apache.org/launcher/	406
Apache Commons Launcher	2992	8027	Java	pamarcelot	32	http://commons.apache.org/launcher/	406
Apache Commons Launcher	2992	8027	Java	jukka	33	http://commons.apache.org/launcher/	406
Apache Commons Launcher	2992	8027	Java	damitha	34	http://commons.apache.org/launcher/	406
Apache Commons Launcher	2992	8027	Java	gsingers	34	http://commons.apache.org/launcher/	406
Apache Commons Launcher	2992	8027	Java	veithen	34	http://commons.apache.org/launcher/	406
Apache Commons Launcher	2992	8027	Java	mikedd	35	http://commons.apache.org/launcher/	406
Apache Commons Launcher	2992	8027	Java	slaws	35	http://commons.apache.org/launcher/	406
Apache Commons Launcher	2992	8027	Java	dblevins	36	http://commons.apache.org/launcher/	406
Apache Commons Launcher	2992	8027	Java	jacopoc	36	http://commons.apache.org/launcher/	406
Apache Commons Launcher	2992	8027	Java	jgomes	36	http://commons.apache.org/launcher/	406
Apache Commons Launcher	2992	8027	Java	gsim	37	http://commons.apache.org/launcher/	406
Apache Commons Launcher	2992	8027	Java	mor	37	http://commons.apache.org/launcher/	406
Apache Commons Launcher	2992	8027	Java	jbohn	38	http://commons.apache.org/launcher/	406
Apache Commons Launcher	2992	8027	Java	jstrachan	38	http://commons.apache.org/launcher/	406
Apache Commons Launcher	2992	8027	Java	ebourg	40	http://commons.apache.org/launcher/	406
Apache Commons Launcher	2992	8027	Java	chirino	41	http://commons.apache.org/launcher/	406
Apache Commons Launcher	2992	8027	Java	cziegeler	41	http://commons.apache.org/launcher/	406
Apache Commons Launcher	2992	8027	Java	hboutemy	43	http://commons.apache.org/launcher/	406
Apache Commons Launcher	2992	8027	Java	ngn	44	http://commons.apache.org/launcher/	406
Apache Commons Launcher	2992	8027	Java	ppoddar	44	http://commons.apache.org/launcher/	406
Apache Commons Launcher	2992	8027	Java	lresende	46	http://commons.apache.org/launcher/	406
Apache Commons Launcher	2992	8027	Java	rdonkin	46	http://commons.apache.org/launcher/	406
Apache Commons Launcher	2992	8027	Java	omalley	47	http://commons.apache.org/launcher/	406
Apache Commons Launcher	2992	8027	Java	sisbell	47	http://commons.apache.org/launcher/	406
Apache Commons Launcher	2992	8027	Java	skitching	47	http://commons.apache.org/launcher/	406
Apache Commons Launcher	2992	8027	Java	doogie	53	http://commons.apache.org/launcher/	406
Apache Commons Launcher	2992	8027	Java	assaf	54	http://commons.apache.org/launcher/	406
Apache Commons Launcher	2992	8027	Java	shalin	54	http://commons.apache.org/launcher/	406
Apache Commons Launcher	2992	8027	Java	gertv	55	http://commons.apache.org/launcher/	406
Apache Commons Launcher	2992	8027	Java	nbubna	55	http://commons.apache.org/launcher/	406
Apache Commons Launcher	2992	8027	Java	niallp	55	http://commons.apache.org/launcher/	406
Apache Commons Launcher	2992	8027	Java	ffang	57	http://commons.apache.org/launcher/	406
Apache Commons Launcher	2992	8027	Java	elecharny	59	http://commons.apache.org/launcher/	406
Apache Commons Launcher	2992	8027	Java	hlship	59	http://commons.apache.org/launcher/	406
Apache Commons Launcher	2992	8027	Java	gawor	62	http://commons.apache.org/launcher/	406
Apache Commons Launcher	2992	8027	Java	ningjiang	63	http://commons.apache.org/launcher/	406
Apache Commons Launcher	2992	8027	Java	rfeng	64	http://commons.apache.org/launcher/	406
Apache Commons Launcher	2992	8027	Java	ajaquith	68	http://commons.apache.org/launcher/	406
Apache Commons Launcher	2992	8027	Java	edwardyoon	69	http://commons.apache.org/launcher/	406
Apache Commons Launcher	2992	8027	Java	hansbak	69	http://commons.apache.org/launcher/	406
Apache Commons Launcher	2992	8027	Java	stack	69	http://commons.apache.org/launcher/	406
Apache Commons Launcher	2992	8027	Java	jvanzyl	71	http://commons.apache.org/launcher/	406
Apache Commons Launcher	2992	8027	Java	davsclaus	73	http://commons.apache.org/launcher/	406
Apache Commons Launcher	2992	8027	Java	jleroux	76	http://commons.apache.org/launcher/	406
Apache Commons Launcher	2992	8027	Java	aheritier	86	http://commons.apache.org/launcher/	406
Apache Commons Launcher	2992	8027	Java	nick	91	http://commons.apache.org/launcher/	406
Apache Commons Launcher	2992	8027	Java	jeremias	97	http://commons.apache.org/launcher/	406
Apache Commons Launcher	2992	8027	Java	akarasulu	99	http://commons.apache.org/launcher/	406
Apache Commons Launcher	2992	8027	Java	gnodet	99	http://commons.apache.org/launcher/	406
Apache Commons Launcher	2992	8027	Java	matzew	101	http://commons.apache.org/launcher/	406
Apache Commons Launcher	2992	8027	Java	ogusakov	104	http://commons.apache.org/launcher/	406
Apache Commons Launcher	2992	8027	Java	dennisl	105	http://commons.apache.org/launcher/	406
Apache Commons Launcher	2992	8027	Java	jdcasey	105	http://commons.apache.org/launcher/	406
Apache Commons Launcher	2992	8027	Java	dkulp	106	http://commons.apache.org/launcher/	406
Apache Commons Launcher	2992	8027	Java	markt	107	http://commons.apache.org/launcher/	406
Apache Commons Launcher	2992	8027	Java	antelder	115	http://commons.apache.org/launcher/	406
Apache Commons Launcher	2992	8027	Java	brett	116	http://commons.apache.org/launcher/	406
Apache Commons Launcher	2992	8027	Java	lu4242	130	http://commons.apache.org/launcher/	406
Apache Commons Launcher	2992	8027	Java	jm	136	http://commons.apache.org/launcher/	406
Apache Commons Launcher	2992	8027	Java	reinhard	153	http://commons.apache.org/launcher/	406
Apache Commons Launcher	2992	8027	Java	olamy	156	http://commons.apache.org/launcher/	406
Apache Commons Launcher	2992	8027	Java	bentmann	216	http://commons.apache.org/launcher/	406
Apache Commons Launcher	2992	8027	Java	vsiveton	228	http://commons.apache.org/launcher/	406
Apache Commons Launcher	2992	8027	Java	bago	291	http://commons.apache.org/launcher/	406
Apache Commons Logging	9613	879	Java	baliuka	1	http://commons.apache.org/proper/commons-logging/	29
Apache Commons Logging	9613	879	Java	donaldp	1	http://commons.apache.org/proper/commons-logging/	29
Apache Commons Logging	9613	879	Java	jstrachan	1	http://commons.apache.org/proper/commons-logging/	29
Apache Commons Logging	9613	879	Java	mbenson	1	http://commons.apache.org/proper/commons-logging/	29
Apache Commons Logging	9613	879	Java	olamy	1	http://commons.apache.org/proper/commons-logging/	29
Apache Commons Logging	9613	879	Java	proyal	1	http://commons.apache.org/proper/commons-logging/	29
Apache Commons Logging	9613	879	Java	psteitz	1	http://commons.apache.org/proper/commons-logging/	29
Apache Commons Logging	9613	879	Java	tobrien	1	http://commons.apache.org/proper/commons-logging/	29
Apache Commons Logging	9613	879	Java	brett	2	http://commons.apache.org/proper/commons-logging/	29
Apache Commons Logging	9613	879	Java	rahul	2	http://commons.apache.org/proper/commons-logging/	29
Apache Commons Logging	9613	879	Java	dirkv	4	http://commons.apache.org/proper/commons-logging/	29
Apache Commons Logging	9613	879	Java	jvanzyl	4	http://commons.apache.org/proper/commons-logging/	29
Apache Commons Logging	9613	879	Java	morgand	4	http://commons.apache.org/proper/commons-logging/	29
Apache Commons Logging	9613	879	Java	rwaldhoff	4	http://commons.apache.org/proper/commons-logging/	29
Apache Commons Logging	9613	879	Java	sullis	4	http://commons.apache.org/proper/commons-logging/	29
Apache Commons Logging	9613	879	Java	dion	6	http://commons.apache.org/proper/commons-logging/	29
Apache Commons Logging	9613	879	Java	mdiggory	6	http://commons.apache.org/proper/commons-logging/	29
Apache Commons Logging	9613	879	Java	ggregory	11	http://commons.apache.org/proper/commons-logging/	29
Apache Commons Logging	9613	879	Java	sanders	12	http://commons.apache.org/proper/commons-logging/	29
Apache Commons Logging	9613	879	Java	costin	18	http://commons.apache.org/proper/commons-logging/	29
Apache Commons Logging	9613	879	Java	bayard	19	http://commons.apache.org/proper/commons-logging/	29
Apache Commons Logging	9613	879	Java	niallp	28	http://commons.apache.org/proper/commons-logging/	29
Apache Commons Logging	9613	879	Java	rsitze	33	http://commons.apache.org/proper/commons-logging/	29
Apache Commons Logging	9613	879	Java	sebb	44	http://commons.apache.org/proper/commons-logging/	29
Apache Commons Logging	9613	879	Java	craigmcc	67	http://commons.apache.org/proper/commons-logging/	29
Apache Commons Logging	9613	879	Java	tn	69	http://commons.apache.org/proper/commons-logging/	29
Apache Commons Logging	9613	879	Java	dennisl	101	http://commons.apache.org/proper/commons-logging/	29
Apache Commons Logging	9613	879	Java	rdonkin	211	http://commons.apache.org/proper/commons-logging/	29
Apache Commons Logging	9613	879	Java	skitching	222	http://commons.apache.org/proper/commons-logging/	29
Apache Commons Math	199205	5253	Java	brett	1	http://commons.apache.org/math/	28
Apache Commons Math	199205	5253	Java	mbenson	1	http://commons.apache.org/math/	28
Apache Commons Math	199205	5253	Java	scolebourne	1	http://commons.apache.org/math/	28
Apache Commons Math	199205	5253	Java	danielsh	2	http://commons.apache.org/math/	28
Apache Commons Math	199205	5253	Java	dion	2	http://commons.apache.org/math/	28
Apache Commons Math	199205	5253	Java	evanward	2	http://commons.apache.org/math/	28
Apache Commons Math	199205	5253	Java	dbrosius	3	http://commons.apache.org/math/	28
Apache Commons Math	199205	5253	Java	ggregory	4	http://commons.apache.org/math/	28
Apache Commons Math	199205	5253	Java	olamy	5	http://commons.apache.org/math/	28
Apache Commons Math	199205	5253	Java	rahul	6	http://commons.apache.org/math/	28
Apache Commons Math	199205	5253	Java	dimpbx	9	http://commons.apache.org/math/	28
Apache Commons Math	199205	5253	Java	rdonkin	9	http://commons.apache.org/math/	28
Apache Commons Math	199205	5253	Java	pietsch	10	http://commons.apache.org/math/	28
Apache Commons Math	199205	5253	Java	gregs	11	http://commons.apache.org/math/	28
Apache Commons Math	199205	5253	Java	dirkv	16	http://commons.apache.org/math/	28
Apache Commons Math	199205	5253	Java	mikl	28	http://commons.apache.org/math/	28
Apache Commons Math	199205	5253	Java	niallp	30	http://commons.apache.org/math/	28
Apache Commons Math	199205	5253	Java	bayard	31	http://commons.apache.org/math/	28
Apache Commons Math	199205	5253	Java	billbarker	59	http://commons.apache.org/math/	28
Apache Commons Math	199205	5253	Java	tobrien	72	http://commons.apache.org/math/	28
Apache Commons Math	199205	5253	Java	brentworden	74	http://commons.apache.org/math/	28
Apache Commons Math	199205	5253	Java	mdiggory	182	http://commons.apache.org/math/	28
[truncated: 8,073 more rows]
